# Supplementary material
Source: PubMed Central journal article supplement (PMC3077061)
Supplement: NIHMS265571-supplement-2.pdf [file NIHMS265571-supplement-2.pdf]

| <b>chromosome</b> | <b>total #</b> | <b># up</b> | <b># down</b> |
|-------------------|----------------|-------------|---------------|
| 1                 | 36             | 21          | 15            |
| 2                 | 37             | 19          | 18            |
| 3                 | 33             | 16          | 17            |
| 4                 | 17             | 11          | 6             |
| 5                 | 32             | 20          | 12            |
| 6                 | 30             | 17          | 13            |
| 7                 | 28             | 17          | 11            |
| 8                 | 24             | 11          | 13            |
| 9                 | 13             | 6           | 7             |
| 10                | 14             | 7           | 7             |
| 11                | 22             | 10          | 12            |
| 12                | 32             | 18          | 14            |
| 13                | 9              | 5           | 4             |
| 14                | 14             | 8           | 6             |
| 15                | 16             | 12          | 4             |
| 16                | 9              | 4           | 5             |
| 17                | 26             | 10          | 16            |
| 18                | 10             | 6           | 4             |
| 19                | 17             | 6           | 11            |
| 20                | 7              | 1           | 6             |
| 21                | 10             | 9           | 1             |
| 22                | 7              | 4           | 3             |
| X                 | 9              | 3           | 6             |
