# Supplementary material
Source: PubMed Central journal article supplement (PMC3077061)
Supplement: NIHMS265571-supplement-3.pdf [file NIHMS265571-supplement-3.pdf]

---

| <b>Type of prostate tissue</b> | <b>Number of cases</b> |
|--------------------------------|------------------------|
| Normal prostate                | 29                     |
| PCa Gleason score 6            | 40                     |
| PCa Gleason score 7            | 74                     |
| PCa Gleason score 8            | 9                      |
| PCa Gleason score 9            | 7                      |
| Metastatic PCa                 | 19                     |

---
