# Supplementary material
Source: PubMed Central journal article supplement (PMC3077061)
Supplement: NIHMS265571-supplement-4.pdf [file NIHMS265571-supplement-4.pdf]

---

| Gene symbol | parametric p-value | FDR   | permutation p-value | hazards ratio |
|-------------|--------------------|-------|---------------------|---------------|
| TNRC6A      | 0.001660           | 0.202 | < 1e-07             | 0.135         |
| RPL13       | 0.002913           | 0.202 | 0.005               | 0.150         |
| NPIPL3      | 0.008794           | 0.307 | 0.009               | 0.190         |
| ANKRD50     | 0.010858           | 0.307 | 0.015               | 0.375         |
| GRHL1       | 0.012903           | 0.307 | 0.011               | 0.293         |
| ENTPD4      | 0.014215           | 0.307 | 0.023               | 0.222         |
| TTYH2       | 0.015468           | 0.307 | 0.013               | 12.601        |
| HMGCS2      | 0.021933           | 0.310 | 0.023               | 0.543         |
| AHNAK       | 0.024634           | 0.310 | 0.013               | 0.083         |
| IL10RB      | 0.030052           | 0.310 | 0.024               | 0.256         |
| CNNM2       | 0.031078           | 0.310 | 0.031               | 12.668        |
| DGKB        | 0.031314           | 0.310 | 0.029               | 5.870         |
| C1orf226    | 0.033464           | 0.310 | 0.031               | 7.390         |
| MAP2K4      | 0.033824           | 0.310 | 0.035               | 0.341         |
| FAM105A     | 0.034988           | 0.310 | 0.035               | 3.471         |
| LOC144481   | 0.035639           | 0.310 | 0.039               | 0.414         |
| DGAT2       | 0.042059           | 0.344 | 0.033               | 4.079         |
| RCAN1       | 0.045748           | 0.353 | 0.061               | 0.271         |

---
