# Supplementary material
Source: PubMed Central journal article supplement (PMC3077061)
Supplement: NIHMS265571-supplement-9.pdf [file NIHMS265571-supplement-9.pdf]

| target gene | primer pair | target sequence       |
|-------------|-------------|-----------------------|
| CCL8        | 5'          | gacttgctcagccagattca  |
|             | 3'          | cacagcttccttgggacatt  |
| CDC25A      | 5'          | cccaaaggaaccattgagaa  |
|             | 3'          | cctgatgttcccagcaact   |
| DGAT2       | 5'          | gtacactggcaggcaactt   |
|             | 3'          | cattgccactcccattcttt  |
| IER5        | 5'          | gttcaagctggaggctcatc  |
|             | 3'          | gcgagaccaggagggttetta |
| IL17RD      | 5'          | ctgtctctgccactgatgga  |
|             | 3'          | ccagaagagaggagcttgga  |
| PLEKHH1     | 5'          | gtttccctgggtctttctc   |
|             | 3'          | ctcgtccataaaggcatgt   |
| SLITRK6     | 5'          | ctccaagatgccagctcat   |
|             | 3'          | gtgggctccaggataatgtg  |
| SSR3        | 5'          | ctgttctggctcgtggcat   |
|             | 3'          | cgatgagtcctgatgaagca  |
| TMEM134     | 5'          | gattccagccgaactccat   |
|             | 3'          | cggttcttctggatcaaagg  |
| B3GAT3      | 5'          | ccacctggagagcagcttc   |
|             | 3'          | gctcctctgcttcatcttg   |
| TIPRL       | 5'          | gccatctctccctgaaatga  |
|             | 3'          | gcacaggccactttaagcat  |
| KTN1        | 5'          | gaatgctgagcaagcagcta  |
|             | 3'          | tgtccgctgttctcttct    |
| NXT1        | 5'          | ggtagactgccagcctgttc  |
|             | 3'          | ctggttgaagtcccgttgtt  |
| RAP2C       | 5'          | gagctctggctcaagaatgg  |
|             | 3'          | ctccggcagggatgaatagt  |
