# Supplementary material
Source: PubMed Central journal article supplement (PMC3077061)
Supplement: NIHMS265571-supplement-10.pdf [file NIHMS265571-supplement-10.pdf]

| Differential Expression Analysis for Dr. Heemers.                                                                                                  |         |            |           |                                       |                                          |                                                     |             |            |                  |                                        |  |
|----------------------------------------------------------------------------------------------------------------------------------------------------|---------|------------|-----------|---------------------------------------|------------------------------------------|-----------------------------------------------------|-------------|------------|------------------|----------------------------------------|--|
| These 131 Affymetrix HG-U133Plus2.0 probesets are the result of selecting only probesets that met the following two criteria:                      |         |            |           |                                       |                                          |                                                     |             |            |                  |                                        |  |
| 1) LUC treated with R1881 had statistically higher expression values with at least a 2 fold-change compared to each of the other three groups.     |         |            |           |                                       |                                          |                                                     |             |            |                  |                                        |  |
| 2) Of the remaining three groups none of the 3 pairwise tests showed significant difference.                                                       |         |            |           |                                       |                                          |                                                     |             |            |                  |                                        |  |
| Table results (log2 Fold Change, t, adjusted p-value, etc.) are from the comparison of the LUC Samples R1881 treated (n=3) vs. EtOH treated (n=3). |         |            |           |                                       |                                          |                                                     |             |            |                  |                                        |  |
| Rank Order                                                                                                                                         | Symbol  | GenBank ID | LocusLink | Affymetrix HG-U133Plus2.0 Probeset ID | log2 Fold Change from LUC R1881 vs. EtOH | Average Expression from all Experimental Conditions | t Statistic | p-value    | adjusted p-value | B: Log odds of Differential Expression |  |
| 1                                                                                                                                                  | CRIM1   | BG546884   | 51232     | 202551_s_at                           | 3.013                                    | 4.053                                               | 38.347      | 1.90E-11   | 2.29E-09         | 17.849                                 |  |
| 2                                                                                                                                                  | SLC26A3 | NM_000111  | 1811      | 206143_at                             | 3.314                                    | 3.491                                               | 35.723      | 3.62E-11   | 2.29E-09         | 17.377                                 |  |
| 3                                                                                                                                                  | SDK1    | AL042166   | 221935    | 229912_at                             | 2.915                                    | 3.232                                               | 33.334      | 6.81E-11   | 2.29E-09         | 16.897                                 |  |
| 4                                                                                                                                                  | ACTA2   | NM_001613  | 59        | 200974_at                             | 2.658                                    | 6.189                                               | 32.879      | 7.72E-11   | 2.29E-09         | 16.799                                 |  |
| 5                                                                                                                                                  | NA      | AW014022   | NA        | 230577_at                             | 4.287                                    | 3.918                                               | 32.429      | 8.75E-11   | 2.29E-09         | 16.7                                   |  |
| 6                                                                                                                                                  | ERN1    | AW194689   | 2081      | 239045_at                             | 1.821                                    | 2.998                                               | 30.652      | 1.46E-10   | 3.19E-09         | 16.288                                 |  |
| 7                                                                                                                                                  | CRIM1   | AW243081   | 51232     | 228496_s_at                           | 2.618                                    | 4.060                                               | 29.057      | 2.38E-10   | 4.45E-09         | 15.886                                 |  |
| 8                                                                                                                                                  | ADAM32  | NM_145004  | 203102    | 1552266_at                            | 2.417                                    | 3.989                                               | 27.941      | 3.39E-10   | 5.55E-09         | 15.585                                 |  |
| 9                                                                                                                                                  | FMO5    | NM_001461  | 2330      | 205776_at                             | 2.671                                    | 3.176                                               | 27.225      | 4.29E-10   | 6.25E-09         | 15.383                                 |  |
| 10                                                                                                                                                 | NA      | BU632652   | NA        | 1561542_at                            | 2.435                                    | 2.557                                               | 24.242      | 1.23E-09   | 1.61E-08         | 14.453                                 |  |
| 11                                                                                                                                                 | GBP3    | AW014593   | 2635      | 231577_s_at                           | 3.234                                    | 4.209                                               | 21.540      | 3.58E-09   | 4.26E-08         | 13.469                                 |  |
| 12                                                                                                                                                 | NA      | AI090874   | NA        | 240110_at                             | 2.537                                    | 4.463                                               | 20.640      | 5.25E-09   | 5.73E-08         | 13.106                                 |  |
| 13                                                                                                                                                 | NA      | BF507344   | NA        | 229370_at                             | 1.546                                    | 3.777                                               | 20.428      | 5.77E-09   | 5.81E-08         | 13.017                                 |  |
| 14                                                                                                                                                 | SLITRK6 | AI680986   | 84189     | 235976_at                             | 2.338                                    | 4.290                                               | 17.548      | 2.25E-08   | 2.11E-07         | 11.694                                 |  |
| 15                                                                                                                                                 | CNN2    | NM_004368  | 1265      | 201605_x_at                           | 1.146                                    | 6.696                                               | 16.762      | 3.39E-08   | 2.96E-07         | 11.288                                 |  |
| 16                                                                                                                                                 | NHP2L1  | AI288202   | 4809      | 230443_at                             | 2.033                                    | 3.026                                               | 16.575      | 3.75E-08   | 3.07E-07         | 11.188                                 |  |
| 17                                                                                                                                                 | CITED2  | AF109161   | 10370     | 209357_at                             | 1.137                                    | 9.763                                               | 16.132      | 4.77E-08   | 3.68E-07         | 10.946                                 |  |
| 18                                                                                                                                                 | LAMA1   | AI990816   | 284217    | 227048_at                             | 2.524                                    | 2.765                                               | 15.869      | 5.52E-08   | 3.82E-07         | 10.799                                 |  |
| 19                                                                                                                                                 | DNAH7   | AB023161   | 56171     | 214222_at                             | 2.195                                    | 3.788                                               | 15.865      | 5.54E-08   | 3.82E-07         | 10.797                                 |  |
| 20                                                                                                                                                 | WFS1    | NM_006005  | 7466      | 202908_at                             | 1.390                                    | 7.798                                               | 15.421      | 7.12E-08   | 4.66E-07         | 10.543                                 |  |
| 21                                                                                                                                                 | WWTR1   | NM_015472  | 25937     | 202134_s_at                           | 2.447                                    | 3.210                                               | 15.171      | 8.23E-08   | 5.13E-07         | 10.396                                 |  |
| 22                                                                                                                                                 | AHNAK   | NM_024060  | 79026     | 220016_at                             | 2.024                                    | 4.035                                               | 15.077      | 8.70E-08   | 5.18E-07         | 10.341                                 |  |
| 23                                                                                                                                                 | GBP1    | BC002666   | 2633      | 202269_x_at                           | 2.485                                    | 4.019                                               | 14.947      | 9.39E-08   | 5.31E-07         | 10.263                                 |  |
| 24                                                                                                                                                 | CNTNAP2 | AC005378   | 26047     | 215145_s_at                           | 1.769                                    | 3.238                                               | 14.888      | 9.72E-08   | 5.31E-07         | 10.228                                 |  |
| 25                                                                                                                                                 | CYR61   | NM_001554  | 3491      | 201289_at                             | 1.585                                    | 6.660                                               | 14.533      | 1.20E-07   | 6.13E-07         | 10.01                                  |  |
| 26                                                                                                                                                 | ITGAV   | AU144005   | 3685      | 232797_at                             | 1.962                                    | 4.062                                               | 14.516      | 1.22E-07   | 6.13E-07         | 10                                     |  |
| 27                                                                                                                                                 | F5      | AI740541   | 2153      | 231029_at                             | 2.401                                    | 3.201                                               | 14.290      | 1.40E-07   | 6.78E-07         | 9.859                                  |  |
| 28                                                                                                                                                 | UBE2J1  | NM_016021  | 51465     | 217826_s_at                           | 1.619                                    | 9.414                                               | 14.083      | 1.5885E-07 | 7.43188E-07      | 9.727                                  |  |
| 29                                                                                                                                                 | LMO7    | AA100793   | 4008      | 242722_at                             | 2.66                                     | 3.851                                               | 13.519      | 2.2761E-07 | 1.01495E-06      | 9.357                                  |  |
| 30                                                                                                                                                 | SLITRK6 | R70320     | 84189     | 232176_at                             | 2.939                                    | 3.967                                               | 13.468      | 2.3519E-07 | 1.01495E-06      | 9.324                                  |  |

| Rank Order | Symbol   | GenBank ID | LocusLink | Affymetrix HG-U133Plus2.0 Probeset ID | log2 Fold Change from LUC R1881 vs. EtOH | Average Expression from all Experimental Conditions | t Statistic | p-value    | adjusted p-value | B: Log odds of Differential Expression |
|------------|----------|------------|-----------|---------------------------------------|------------------------------------------|-----------------------------------------------------|-------------|------------|------------------|----------------------------------------|
| 31         | NA       | AI194016   | NA        | 244116_at                             | 1.708                                    | 3.251                                               | 13.436      | 2.4018E-07 | 1.01495E-06      | 9.302                                  |
| 32         | SLC22A5  | AI768445   | 6584      | 239615_at                             | 1.437                                    | 4.457                                               | 13.193      | 2.8193E-07 | 1.15414E-06      | 9.137                                  |
| 33         | FLJ13137 | AA129774   | 400793    | 227019_at                             | 2.276                                    | 3.955                                               | 13.026      | 3.1505E-07 | 1.25066E-06      | 9.022                                  |
| 34         | WDFY2    | T87542     | 115825    | 227490_at                             | 1.568                                    | 3.812                                               | 12.625      | 4.1411E-07 | 1.59552E-06      | 8.739                                  |
| 35         | CNNM2    | BC021222   | 54805     | 1554522_at                            | 1.858                                    | 4.615                                               | 12.289      | 5.2372E-07 | 1.96022E-06      | 8.495                                  |
| 36         | OTUD7B   | NM_020205  | 56957     | 220031_at                             | 1.276                                    | 3.068                                               | 12.197      | 5.5919E-07 | 2.03483E-06      | 8.427                                  |
| 37         | NA       | AW967747   | NA        | 235360_at                             | 1.798                                    | 5.76                                                | 12.031      | 6.2989E-07 | 2.23016E-06      | 8.303                                  |
| 38         | CCDC4    | AA833830   | 389206    | 230896_at                             | 2.77                                     | 5.274                                               | 11.854      | 7.1639E-07 | 2.46965E-06      | 8.169                                  |
| 39         | DGKB     | AB018261   | 1607      | 216307_at                             | 1.24                                     | 6.839                                               | 11.787      | 7.5226E-07 | 2.47391E-06      | 8.118                                  |
| 40         | NA       | H19488     | NA        | 238573_at                             | 1.601                                    | 6.542                                               | 11.782      | 7.5539E-07 | 2.47391E-06      | 8.113                                  |
| 41         | GBP1     | NM_002053  | 2633      | 202270_at                             | 2.074                                    | 3.373                                               | 11.637      | 8.4054E-07 | 2.68564E-06      | 8.002                                  |
| 42         | ARL4A    | NM_005738  | 10124     | 205020_s_at                           | 1.274                                    | 3.894                                               | 11.563      | 8.8821E-07 | 2.77037E-06      | 7.944                                  |
| 43         | SLC39A3  | AA535975   | 29985     | 229677_at                             | 1.054                                    | 5.021                                               | 11.497      | 9.3356E-07 | 2.84411E-06      | 7.892                                  |
| 44         | GOLGA2   | NM_004486  | 2801      | 204384_at                             | 1.334                                    | 6.93                                                | 11.203      | 1.1667E-06 | 3.47365E-06      | 7.659                                  |
| 45         | NNMT     | NM_006169  | 4837      | 202238_s_at                           | 1.388                                    | 3.574                                               | 10.991      | 1.3756E-06 | 4.0045E-06       | 7.486                                  |
| 46         | LIN7A    | T82147     | 8825      | 241652_x_at                           | 1.147                                    | 4.795                                               | 10.884      | 1.4955E-06 | 4.25896E-06      | 7.398                                  |
| 47         | TTC12    | BC032355   | 54970     | 1554531_at                            | 1.368                                    | 2.772                                               | 10.778      | 1.6267E-06 | 4.53387E-06      | 7.31                                   |
| 48         | TM4SF18  | AI721164   | 116441    | 228489_at                             | 1.034                                    | 2.347                                               | 10.625      | 1.8381E-06 | 5.01644E-06      | 7.181                                  |
| 49         | IL10RB   | AI202642   | 3588      | 230631_s_at                           | 2.265                                    | 3.015                                               | 10.581      | 1.9049E-06 | 5.09267E-06      | 7.144                                  |
| 50         | NA       | H95280     | NA        | 239642_at                             | 2.072                                    | 3.302                                               | 10.488      | 2.0548E-06 | 5.38357E-06      | 7.064                                  |
| 51         | CCDC15   | BG413368   | 80071     | 241360_at                             | 2.34                                     | 5.174                                               | 10.31       | 2.3765E-06 | 6.10441E-06      | 6.91                                   |
| 52         | CALU     | U67280     | 813       | 200756_x_at                           | 1.335                                    | 8.157                                               | 10.175      | 2.6591E-06 | 6.58949E-06      | 6.792                                  |
| 53         | NA       | AW979182   | NA        | 243724_at                             | 1.299                                    | 5.678                                               | 10.172      | 2.666E-06  | 6.58949E-06      | 6.789                                  |
| 54         | RAB3IP   | AI436813   | 117177    | 238853_at                             | 1.521                                    | 4.101                                               | 9.778       | 3.7265E-06 | 9.04023E-06      | 6.435                                  |
| 55         | DIDO1    | BE222450   | 11083     | 238920_at                             | 1.198                                    | 2.838                                               | 9.618       | 4.28E-06   | 1.01943E-05      | 6.289                                  |
| 56         | SDK1     | AF131799   | 221935    | 229407_at                             | 1.624                                    | 2.723                                               | 9.435       | 5.0328E-06 | 1.17635E-05      | 6.117                                  |
| 57         | RAB3IP   | BE671491   | 117177    | 231399_at                             | 1.576                                    | 4.015                                               | 9.413       | 5.132E-06  | 1.17635E-05      | 6.097                                  |
| 58         | CCL8     | AI984980   | 6355      | 214038_at                             | 2.567                                    | 3.411                                               | 9.396       | 5.2108E-06 | 1.17635E-05      | 6.08                                   |
| 59         | DGKZ     | AI567554   | 8525      | 239342_at                             | 1.02                                     | 2.327                                               | 9.377       | 5.2981E-06 | 1.17635E-05      | 6.063                                  |
| 60         | C6orf125 | AI686131   | 84300     | 229443_at                             | 1.211                                    | 4.448                                               | 9.331       | 5.525E-06  | 1.20628E-05      | 6.018                                  |
| 61         | ELMO2    | NM_022086  | 63916     | 220363_s_at                           | 1.783                                    | 7.408                                               | 9.281       | 5.7779E-06 | 1.24084E-05      | 5.971                                  |
| 62         | VPS26B   | AA514326   | 112936    | 230306_at                             | 1.291                                    | 7.55                                                | 9.21        | 6.1621E-06 | 1.29835E-05      | 5.903                                  |
| 63         | CITED2   | NM_006079  | 10370     | 207980_s_at                           | 1.161                                    | 9.758                                               | 9.195       | 6.244E-06  | 1.29835E-05      | 5.889                                  |
| 64         | LOC73005 | AW014345   | 730051    | 236229_at                             | 1.065                                    | 6.336                                               | 9.143       | 6.5502E-06 | 1.34074E-05      | 5.838                                  |
| 65         | ZNF432   | AF086256   | 9668      | 1556678_a_at                          | 1.3                                      | 3.909                                               | 9.095       | 6.8446E-06 | 1.37945E-05      | 5.791                                  |
| 66         | WFS1     | BC030130   | 7466      | 1555270_a_at                          | 1.399                                    | 6.8                                                 | 9.009       | 7.4076E-06 | 1.47029E-05      | 5.707                                  |
| 67         | ATP7B    | NM_000053  | 540       | 204624_at                             | 1.707                                    | 5.973                                               | 8.973       | 7.6566E-06 | 1.49105E-05      | 5.672                                  |

| Rank Order | Symbol   | GenBank ID | LocusLink | Affymetrix HG-U133Plus2.0 Probeset ID | log2 Fold Change from LUC R1881 vs. EtOH | Average Expression from all Experimental Conditions | t Statistic | p-value    | adjusted p-value | B: Log odds of Differential Expression |
|------------|----------|------------|-----------|---------------------------------------|------------------------------------------|-----------------------------------------------------|-------------|------------|------------------|----------------------------------------|
| 68         | NA       | AI281932   | NA        | 230762_at                             | 1.238                                    | 3.892                                               | 8.961       | 7.7398E-06 | 1.49105E-05      | 5.661                                  |
| 69         | GRHL1    | NM_014552  | 29841     | 1552685_a_at                          | 1.557                                    | 6.142                                               | 8.572       | 1.118E-05  | 2.09716E-05      | 5.27                                   |
| 70         | MMP10    | NM_002425  | 4319      | 205680_at                             | 2.431                                    | 3.398                                               | 8.57        | 1.1206E-05 | 2.09716E-05      | 5.267                                  |
| 71         | MGC13017 | BC018086   | 91368     | 1554348_s_at                          | 1.135                                    | 3.203                                               | 8.325       | 1.423E-05  | 2.62559E-05      | 5.013                                  |
| 72         | CALU     | AF257659   | 813       | 214845_s_at                           | 1.47                                     | 8.123                                               | 8.109       | 1.7639E-05 | 3.20923E-05      | 4.784                                  |
| 73         | MAP2K4   | AA810268   | 6416      | 203265_s_at                           | 1.133                                    | 8.539                                               | 8.042       | 1.8864E-05 | 3.35525E-05      | 4.713                                  |
| 74         | C6orf201 | AA121544   | 404220    | 242739_at                             | 1.125                                    | 3.405                                               | 8.038       | 1.8953E-05 | 3.35525E-05      | 4.708                                  |
| 75         | ANK1     | M28880     | 286       | 205391_x_at                           | 1.98                                     | 4.163                                               | 7.987       | 1.9948E-05 | 3.48426E-05      | 4.653                                  |
| 76         | LOC14448 | AK054607   | 144481    | 1559315_s_at                          | 1.225                                    | 3.155                                               | 7.853       | 2.2888E-05 | 3.94521E-05      | 4.507                                  |
| 77         | CDC25A   | AI343459   | 993       | 204695_at                             | 1.662                                    | 6.256                                               | 7.796       | 2.4268E-05 | 4.12877E-05      | 4.444                                  |
| 78         | KIAA1622 | AB046842   | 57718     | 233002_at                             | 1.183                                    | 3.125                                               | 7.724       | 2.6159E-05 | 4.3934E-05       | 4.364                                  |
| 79         | SH3BP4   | BF224439   | 23677     | 231468_at                             | 1.022                                    | 3.053                                               | 7.573       | 3.0656E-05 | 5.08342E-05      | 4.195                                  |
| 80         | NA       | T94585     | NA        | 1560071_a_at                          | 1.077                                    | 2.783                                               | 7.538       | 3.1814E-05 | 5.12977E-05      | 4.156                                  |
| 81         | FGD4     | AA296351   | 121512    | 242445_at                             | 2.072                                    | 3.579                                               | 7.535       | 3.1948E-05 | 5.12977E-05      | 4.151                                  |
| 82         | DHRS2    | NM_005794  | 10202     | 206463_s_at                           | 1.829                                    | 3.606                                               | 7.53        | 3.211E-05  | 5.12977E-05      | 4.146                                  |
| 83         | EPS15L1  | AK023744   | 58513     | 231926_at                             | 1.35                                     | 3.308                                               | 7.444       | 3.5206E-05 | 5.51814E-05      | 4.047                                  |
| 84         | CNTNAP2  | AU144598   | 26047     | 219301_s_at                           | 1.85                                     | 4.179                                               | 7.439       | 3.5383E-05 | 5.51814E-05      | 4.042                                  |
| 85         | NA       | AF052146   | 651803    | 214947_at                             | 1.788                                    | 2.917                                               | 7.375       | 3.7902E-05 | 5.8413E-05       | 3.969                                  |
| 86         | CYR61    | AF003114   | 3491      | 210764_s_at                           | 1.214                                    | 5.995                                               | 7.198       | 4.5997E-05 | 7.00651E-05      | 3.762                                  |
| 87         | NA       | BF438330   | NA        | 227010_at                             | 1.064                                    | 3.966                                               | 7.136       | 4.923E-05  | 7.41272E-05      | 3.69                                   |
| 88         | NA       | AW972855   | NA        | 222315_at                             | 1.082                                    | 2.778                                               | 7.02        | 5.6E-05    | 8.33634E-05      | 3.552                                  |
| 89         | GNA12    | AK024696   | 2768      | 221737_at                             | 1.305                                    | 6.823                                               | 6.959       | 6.0003E-05 | 8.83194E-05      | 3.478                                  |
| 90         | LARP2    | AI339785   | 55132     | 231011_at                             | 1.516                                    | 3.529                                               | 6.941       | 6.1228E-05 | 8.91203E-05      | 3.457                                  |
| 91         | COG3     | AI732206   | 83548     | 238228_at                             | 1.636                                    | 4.701                                               | 6.925       | 6.2349E-05 | 8.95363E-05      | 3.437                                  |
| 92         | NA       | AC004522   | NA        | 217013_at                             | 1.76                                     | 3.433                                               | 6.917       | 6.288E-05  | 8.95363E-05      | 3.428                                  |
| 93         | CLEC11A  | NM_002975  | 6320      | 205131_x_at                           | 1.154                                    | 3.925                                               | 6.773       | 7.4155E-05 | 0.000104455      | 3.252                                  |
| 94         | ANK1     | NM_020479  | 286       | 208352_x_at                           | 1.573                                    | 5.691                                               | 6.624       | 8.8143E-05 | 0.000122838      | 3.068                                  |
| 95         | FLJ43663 | AL569506   | 378805    | 228702_at                             | 2.075                                    | 4.218                                               | 6.544       | 9.6717E-05 | 0.000133368      | 2.969                                  |
| 96         | OR7E47P  | AW514038   | 26628     | 222304_x_at                           | 1.403                                    | 2.849                                               | 6.441       | 0.00010932 | 0.000149179      | 2.838                                  |
| 97         | RBP2     | AA398901   | 5948      | 230334_at                             | 1.044                                    | 3.032                                               | 6.324       | 0.00012566 | 0.000169709      | 2.689                                  |
| 98         | LRIG1    | AI356774   | 26018     | 238339_x_at                           | 1.044                                    | 4.349                                               | 6.29        | 0.00013104 | 0.000175167      | 2.644                                  |
| 99         | LOC15774 | AI499833   | 157740    | 239877_at                             | 1.582                                    | 2.874                                               | 6.229       | 0.00014107 | 0.000184858      | 2.566                                  |
| 100        | HIST1H4H | NM_003543  | 8365      | 208181_at                             | 1.937                                    | 4.759                                               | 6.229       | 0.00014111 | 0.000184858      | 2.565                                  |
| 101        | SSR3     | AW150923   | 6747      | 222412_s_at                           | 1.459                                    | 8.759                                               | 6.177       | 0.00015031 | 0.00019495       | 2.498                                  |
| 102        | FBXL8    | NM_018378  | 55336     | 220080_at                             | 1.451                                    | 4.027                                               | 6.088       | 0.00016756 | 0.000214609      | 2.382                                  |
| 103        | CDC25A   | NM_001789  | 993       | 204696_s_at                           | 1.273                                    | 3.801                                               | 6.083       | 0.00016874 | 0.000214609      | 2.375                                  |
| 104        | SLAIN2   | AV723459   | 57606     | 233230_s_at                           | 1.133                                    | 6.082                                               | 6.047       | 0.00017642 | 0.000222218      | 2.327                                  |

| Rank Order | Symbol   | GenBank ID | LocusLink | Affymetrix HG-U133Plus2.0 Probeset ID | log2 Fold Change from LUC R1881 vs. EtOH | Average Expression from all Experimental Conditions | t Statistic | p-value    | adjusted p-value | B: Log odds of Differential Expression |
|------------|----------|------------|-----------|---------------------------------------|------------------------------------------|-----------------------------------------------------|-------------|------------|------------------|----------------------------------------|
| 105        | DSCR1    | AL049369   | 1827      | 215253_s_at                           | 1.639                                    | 5.828                                               | 5.976       | 0.00019272 | 0.000240445      | 2.233                                  |
| 106        | FAM73A   | AI078279   | 374986    | 235125_x_at                           | 1.053                                    | 8.307                                               | 5.926       | 0.00020508 | 0.000253449      | 2.167                                  |
| 107        | WWTR1    | AA081084   | 25937     | 202132_at                             | 1.715                                    | 3.679                                               | 5.918       | 0.00020709 | 0.000253544      | 2.156                                  |
| 108        | RAB3IP   | AL119897   | 117177    | 238526_at                             | 1.165                                    | 4.862                                               | 5.891       | 0.00021431 | 0.000259952      | 2.12                                   |
| 109        | C18orf8  | AU158529   | 29919     | 232345_at                             | 1.091                                    | 4.233                                               | 5.851       | 0.00022549 | 0.000271         | 2.065                                  |
| 110        | RASSF1   | AI939548   | 11186     | 240278_at                             | 1.06                                     | 3.235                                               | 5.711       | 0.00026964 | 0.000321119      | 1.875                                  |
| 111        | ENTPD4   | NM_004901  | 9583      | 204077_x_at                           | 1.168                                    | 4.195                                               | 5.492       | 0.00035806 | 0.000422578      | 1.573                                  |
| 112        | LOC44090 | AA977481   | 440900    | 228603_at                             | 1.412                                    | 5.055                                               | 5.36        | 0.0004268  | 0.000499201      | 1.386                                  |
| 113        | FAM111B  | AA960844   | 374393    | 1557129_a_at                          | 1.03                                     | 4.774                                               | 5.315       | 0.00045295 | 0.000525098      | 1.322                                  |
| 114        | MBNL1    | AA093668   | 4154      | 235173_at                             | 1.319                                    | 3.912                                               | 5.236       | 0.00050399 | 0.00057915       | 1.209                                  |
| 115        | NA       | AI807887   | NA        | 239242_at                             | 1.156                                    | 4.303                                               | 5.211       | 0.00052158 | 0.000594144      | 1.172                                  |
| 116        | ARID5B   | AL832681   | 84159     | 1563469_at                            | 1.097                                    | 3.756                                               | 5.148       | 0.00056774 | 0.000641153      | 1.082                                  |
| 117        | NA       | BF109773   | NA        | 243063_at                             | 1.258                                    | 4.516                                               | 4.728       | 0.00102067 | 0.001142799      | 0.46                                   |
| 118        | EXOC4    | AI857698   | 60412     | 235974_at                             | 1.048                                    | 3.735                                               | 4.705       | 0.00105344 | 0.001169499      | 0.426                                  |
| 119        | ARID5B   | AI289774   | 84159     | 241837_at                             | 1.385                                    | 3.65                                                | 4.637       | 0.00116222 | 0.001279423      | 0.322                                  |
| 120        | NA       | AK023629   | NA        | 233063_s_at                           | 1.085                                    | 5.607                                               | 4.584       | 0.00125361 | 0.001368522      | 0.242                                  |
| 121        | FLJ43663 | AA417078   | 378805    | 238619_at                             | 1.461                                    | 3.47                                                | 4.546       | 0.00132432 | 0.001433767      | 0.184                                  |
| 122        | CAMKK2   | AF140507   | 10645     | 210787_s_at                           | 1.086                                    | 6.625                                               | 4.507       | 0.00140136 | 0.001504737      | 0.125                                  |
| 123        | NA       | BC042816   | NA        | 1561595_x_at                          | 1.195                                    | 4.098                                               | 4.466       | 0.00148822 | 0.001585016      | 0.061                                  |
| 124        | RC3H2    | BF972355   | 54542     | 230133_at                             | 1.445                                    | 5.233                                               | 4.444       | 0.00153708 | 0.001623854      | 0.027                                  |
| 125        | RIT2     | NM_002930  | 6014      | 206984_s_at                           | 1.154                                    | 3.651                                               | 4.427       | 0.00157524 | 0.001650854      | 0.001                                  |
| 126        | CRIM1    | NM_016441  | 51232     | 202552_s_at                           | 1.107                                    | 3.732                                               | 4.31        | 0.00187405 | 0.001944312      | -0.182                                 |
| 127        | SC5DL    | AK027246   | 6309      | 215064_at                             | 1.49                                     | 4.664                                               | 4.306       | 0.00188494 | 0.001944312      | -0.188                                 |
| 128        | PTGER4   | AI675173   | 5734      | 204896_s_at                           | 1.375                                    | 2.327                                               | 3.997       | 0.00300111 | 0.003071447      | -0.677                                 |
| 129        | LMAN1    | U09716     | 3998      | 203294_s_at                           | 1.156                                    | 8.628                                               | 3.759       | 0.00433287 | 0.004400049      | -1.061                                 |
| 130        | C18orf8  | AK024370   | 29919     | 232348_at                             | 1.262                                    | 4.624                                               | 3.703       | 0.00473378 | 0.004770197      | -1.153                                 |
| 131        | CTH      | NM_001902  | 1491      | 206085_s_at                           | 1.045                                    | 4.827                                               | 3.342       | 0.00839341 | 0.008393406      | -1.747                                 |
