# Supplementary material
Source: PubMed Central journal article supplement (PMC3077061)
Supplement: NIHMS265571-supplement-11.pdf [file NIHMS265571-supplement-11.pdf]

| Differential Expression Analysis for Dr. Heemers.                                                                                                  |           |            |           |                                       |                                          |                                                     |             |            |                  |                                        |  |  |
|----------------------------------------------------------------------------------------------------------------------------------------------------|-----------|------------|-----------|---------------------------------------|------------------------------------------|-----------------------------------------------------|-------------|------------|------------------|----------------------------------------|--|--|
| These 47 Affymetrix HG-U133Plus2.0 probesets are the result of selecting only probesets that met the following two criteria:                       |           |            |           |                                       |                                          |                                                     |             |            |                  |                                        |  |  |
| 1) LUC treated with R1881 had statistically lower expression values with more than -2 fold-change compared to each of the other three groups.      |           |            |           |                                       |                                          |                                                     |             |            |                  |                                        |  |  |
| 2) Of the remaining three groups none of the 3 pairwise tests showed significant difference.                                                       |           |            |           |                                       |                                          |                                                     |             |            |                  |                                        |  |  |
| Table results (log2 Fold Change, t, adjusted p-value, etc.) are from the comparison of the LUC Samples R1881 treated (n=3) vs. EtOH treated (n=3). |           |            |           |                                       |                                          |                                                     |             |            |                  |                                        |  |  |
| Rank Order                                                                                                                                         | Symbol    | GenBank ID | LocusLink | Affymetrix HG-U133Plus2.0 Probeset ID | log2 Fold Change from LUC R1881 vs. EtOH | Average Expression from all Experimental Conditions | t Statistic | p-value    | adjusted p-value | B: Log odds of Differential Expression |  |  |
| 1                                                                                                                                                  | LOC23117  | AC002045   | 23117     | 214870_x_at                           | -1.078                                   | 10.229                                              | -14.564     | 1.18E-07   | 2.36E-06         | 10.03                                  |  |  |
| 2                                                                                                                                                  | C11orf58  | BE748802   | 10944     | 235526_at                             | -1.015                                   | 6.086                                               | -14.295     | 1.39E-07   | 2.36E-06         | 9.861                                  |  |  |
| 3                                                                                                                                                  | FLJ41484  | AI479082   | 650669    | 238127_at                             | -1.755                                   | 6.997                                               | -13.777     | 1.93E-07   | 2.36E-06         | 9.529                                  |  |  |
| 4                                                                                                                                                  | DGAT2     | AW469523   | 84649     | 226064_s_at                           | -2.416                                   | 7.558                                               | -13.558     | 2.22E-07   | 2.36E-06         | 9.384                                  |  |  |
| 5                                                                                                                                                  | ALDH3B2   | NM_000695  | 222       | 204942_s_at                           | -1.049                                   | 8.324                                               | -13.368     | 2.51E-07   | 2.36E-06         | 9.256                                  |  |  |
| 6                                                                                                                                                  | TTYH2     | BC004233   | 94015     | 223741_s_at                           | -1.465                                   | 5.366                                               | -12.979     | 3.25E-07   | 2.55E-06         | 8.989                                  |  |  |
| 7                                                                                                                                                  | DGAT2     | AB048286   | 84649     | 224327_s_at                           | -1.680                                   | 7.102                                               | -12.585     | 4.26E-07   | 2.86E-06         | 8.71                                   |  |  |
| 8                                                                                                                                                  | LAMP2     | AI150000   | 3920      | 226671_at                             | -1.108                                   | 6.753                                               | -11.925     | 6.80E-07   | 4.00E-06         | 8.223                                  |  |  |
| 9                                                                                                                                                  | COL6A2    | AY029208   | 1292      | 209156_s_at                           | -1.655                                   | 6.277                                               | -11.455     | 9.63E-07   | 5.03E-06         | 7.859                                  |  |  |
| 10                                                                                                                                                 | C20orf199 | AI625235   | 441951    | 229899_s_at                           | -1.424                                   | 6.493                                               | -11.226     | 1.15E-06   | 5.39E-06         | 7.677                                  |  |  |
| 11                                                                                                                                                 | RCL1      | BC001025   | 10171     | 222666_s_at                           | -1.111                                   | 7.588                                               | -10.541     | 1.97E-06   | 8.40E-06         | 7.11                                   |  |  |
| 12                                                                                                                                                 | PLEKHH1   | AB033026   | 57475     | 225726_s_at                           | -1.277                                   | 7.725                                               | -10.284     | 2.43E-06   | 9.51E-06         | 6.888                                  |  |  |
| 13                                                                                                                                                 | RPL13     | AI369389   | 6137      | 229590_at                             | -1.003                                   | 8.327                                               | -9.616      | 4.29E-06   | 1.55E-05         | 6.287                                  |  |  |
| 14                                                                                                                                                 | SNHG4     | AJ224167   | 724102    | 1564907_s_at                          | -1.907                                   | 6.162                                               | -9.323      | 5.56E-06   | 1.87E-05         | 6.011                                  |  |  |
| 15                                                                                                                                                 | RPL37A    | AU155515   | 6168      | 213459_at                             | -1.537                                   | 6.442                                               | -8.907      | 8.14E-06   | 2.55E-05         | 5.607                                  |  |  |
| 16                                                                                                                                                 | IER5      | NM_016545  | 51278     | 218611_at                             | -1.784                                   | 6.625                                               | -8.834      | 8.72E-06   | 2.56E-05         | 5.534                                  |  |  |
| 17                                                                                                                                                 | PLEKHH1   | AB033026   | 57475     | 225727_at                             | -1.510                                   | 7.234                                               | -8.676      | 1.01E-05   | 2.75E-05         | 5.376                                  |  |  |
| 18                                                                                                                                                 | RPS6      | AW205632   | 6194      | 238156_at                             | -1.108                                   | 7.002                                               | -8.634      | 1.05E-05   | 2.75E-05         | 5.333                                  |  |  |
| 19                                                                                                                                                 | ANKRD50   | BF196876   | 57182     | 225731_at                             | -1.023                                   | 5.805                                               | -7.938      | 2.10E-05   | 5.19E-05         | 4.6                                    |  |  |
| 20                                                                                                                                                 | KCNS3     | NM_002252  | 3790      | 205968_at                             | -1.354                                   | 5.633                                               | -7.838      | 2.32E-05   | 5.46E-05         | 4.491                                  |  |  |
| 21                                                                                                                                                 | FSTL1     | BC000055   | 11167     | 208782_at                             | -1.426                                   | 7.049                                               | -7.786      | 2.45E-05   | 5.49E-05         | 4.433                                  |  |  |
| 22                                                                                                                                                 | RPL17     | AA522618   | 6139      | 214291_at                             | -1.258                                   | 4.874                                               | -7.390      | 3.73E-05   | 7.93E-05         | 3.985                                  |  |  |
| 23                                                                                                                                                 | GEMIN4    | AF258545   | 50628     | 217099_s_at                           | -1.205                                   | 6.571                                               | -7.333      | 3.97E-05   | 7.93E-05         | 3.921                                  |  |  |
| 24                                                                                                                                                 | TNRC6A    | NM_020847  | 27327     | 1553346_a_at                          | -1.285                                   | 7.057                                               | -7.314      | 4.05E-05   | 7.93E-05         | 3.898                                  |  |  |
| 25                                                                                                                                                 | RORC      | AI218580   | 6097      | 228806_at                             | -1.142                                   | 5.237                                               | -6.999      | 5.74E-05   | 1.08E-04         | 3.527                                  |  |  |
| 26                                                                                                                                                 | PTP4A3    | NM_007079  | 11156     | 206574_s_at                           | -1.445                                   | 4.357                                               | -6.958      | 6.01E-05   | 1.09E-04         | 3.477                                  |  |  |
| 27                                                                                                                                                 | THG1L     | NM_017872  | 54974     | 219122_s_at                           | -1.715                                   | 4.381                                               | -6.810      | 7.10E-05   | 1.24E-04         | 3.298                                  |  |  |
| 28                                                                                                                                                 | IL17RD    | AW007080   | 54756     | 227997_at                             | -2.018                                   | 4.833                                               | -6.433      | 0.00011034 | 0.000185211      | 2.828                                  |  |  |
| 29                                                                                                                                                 | SCAMP1    | AL049223   | 9522      | 212425_at                             | -1.646                                   | 4.545                                               | -6.372      | 0.00011874 | 0.000190424      | 2.75                                   |  |  |
| 30                                                                                                                                                 | NR2C2     | AI571166   | 7182      | 226848_at                             | -1.595                                   | 6.236                                               | -6.352      | 0.00012155 | 0.000190424      | 2.725                                  |  |  |

| Rank Order | Symbol   | GenBank ID | LocusLink | Affymetrix HG-U133Plus2.0 Probeset ID | log2 Fold Change from LUC R1881 vs. EtOH | Average Expression from all Experimental Conditions | t Statistic | p-value    | adjusted p-value | B: Log odds of Differential Expression |
|------------|----------|------------|-----------|---------------------------------------|------------------------------------------|-----------------------------------------------------|-------------|------------|------------------|----------------------------------------|
| 31         | DIAPH2   | NM_006729  | 1730      | 205726_at                             | -1.145                                   | 6.139                                               | -6.189      | 0.00014801 | 0.000224406      | 2.514                                  |
| 32         | NA       | AI857788   | NA        | 227126_at                             | -1.133                                   | 6.36                                                | -6.047      | 0.00017644 | 0.000259147      | 2.327                                  |
| 33         | LHPP     | NM_022126  | 64077     | 218523_at                             | -1.076                                   | 5.769                                               | -6.018      | 0.00018293 | 0.000260534      | 2.288                                  |
| 34         | GSTA4    | N79662     | 2941      | 235405_at                             | -1.18                                    | 6.258                                               | -5.961      | 0.00019628 | 0.000271332      | 2.213                                  |
| 35         | HNRPA1   | AW450929   | 3178      | 221919_at                             | -1.021                                   | 5.977                                               | -5.867      | 0.00022107 | 0.000296861      | 2.086                                  |
| 36         | NACA     | AI992187   | 4666      | 222018_at                             | -1.139                                   | 5.877                                               | -5.768      | 0.00025048 | 0.000327018      | 1.953                                  |
| 37         | ZNF133   | AL049646   | 7692      | 216960_s_at                           | -1.375                                   | 5.266                                               | -5.718      | 0.00026721 | 0.000339268      | 1.884                                  |
| 38         | NA       | AA031404   | 286334    | 226592_at                             | -1.844                                   | 5.339                                               | -5.697      | 0.0002743  | 0.000339268      | 1.856                                  |
| 39         | ALKBH2   | AI865555   | 121642    | 225625_at                             | -1.028                                   | 6.169                                               | -5.37       | 0.00042081 | 0.000507127      | 1.401                                  |
| 40         | ZNF276   | AI983201   | 92822     | 213778_x_at                           | -1.102                                   | 5.166                                               | -5.265      | 0.00048436 | 0.000569128      | 1.251                                  |
| 41         | EGFL7    | NM_016215  | 51162     | 218825_at                             | -1.623                                   | 5.542                                               | -5.166      | 0.00055425 | 0.000635365      | 1.108                                  |
| 42         | PRR3     | NM_025263  | 80742     | 204795_at                             | -1.217                                   | 5.947                                               | -5.121      | 0.00058947 | 0.000659648      | 1.042                                  |
| 43         | FAM89A   | AI130705   | 375061    | 226448_at                             | -1.168                                   | 4.442                                               | -4.576      | 0.00126926 | 0.001387326      | 0.229                                  |
| 44         | C11orf61 | NM_024631  | 79684     | 221208_s_at                           | -1.006                                   | 5.744                                               | -4.519      | 0.00137863 | 0.001472625      | 0.142                                  |
| 45         | SNHG10   | AW972850   | 283596    | 244786_at                             | -1.457                                   | 4.8                                                 | -4.173      | 0.00230011 | 0.002402338      | -0.398                                 |
| 46         | MXRA8    | AW888223   | 54587     | 213422_s_at                           | -1.252                                   | 5.369                                               | -4.067      | 0.00269704 | 0.002755673      | -0.565                                 |
| 47         | MAGED4   | NM_030801  | 81557     | 221261_x_at                           | -1.033                                   | 4.658                                               | -3.693      | 0.00480415 | 0.00480415       | -1.169                                 |
