# Supplementary material
Source: PubMed Central journal article supplement (PMC3077061)
Supplement: NIHMS265571-supplement-12.pdf [file NIHMS265571-supplement-12.pdf]

Cancer (PIN, GP3-5, Met) vs. Noncancer(BPH and Normal)

| Probe set          | Probe_set   | p-value           | bonferroni(p-value) | qvalue(p-value)    | t               |
|--------------------|-------------|-------------------|---------------------|--------------------|-----------------|
| 230577_at          | 230577_at   | 8.01E-16          | 1.44E-13            | 2.91E-14           | 9.64046         |
| 204942_s_at        | 204942_s_at | 9.61E-13          | 1.73E-10            | 2.32E-11           | -8.20941        |
| 232176_at          | 204942_s_at | 4.82E-12          | 8.68E-10            | 8.74E-11           | 7.88005         |
| 202908_at          | 204942_s_at | 2.04E-10          | 3.68E-08            | 2.69E-09           | 7.10332         |
| 235976_at          | 204942_s_at | 2.23E-10          | 4.01E-08            | 2.69E-09           | 7.08522         |
| 222666_s_at        | 204942_s_at | 3.36E-10          | 6.05E-08            | 3.15E-09           | -6.99853        |
| 229912_at          | 204942_s_at | 3.47E-10          | 6.25E-08            | 3.15E-09           | -6.99159        |
| 206574_s_at        | 204942_s_at | 8.89E-10          | 1.60E-07            | 7.16E-09           | -6.79246        |
| 233063_s_at        | 204942_s_at | 1.96E-09          | 3.53E-07            | 1.42E-08           | -6.6234         |
| 238156_at          | 204942_s_at | 7.25E-09          | 1.31E-06            | 4.78E-08           | -6.34049        |
| 1559315_s_at       | 204942_s_at | 1.22E-08          | 2.19E-06            | 7.36E-08           | 6.22712         |
| 213459_at          | 204942_s_at | 3.14E-08          | 5.66E-06            | 1.75E-07           | -6.01771        |
| 201605_x_at        | 204942_s_at | 3.86E-08          | 6.95E-06            | 2.00E-07           | 5.97162         |
| 225625_at          | 204942_s_at | 6.03E-08          | 1.09E-05            | 2.91E-07           | -5.87191        |
| 229899_s_at        | 204942_s_at | 8.33E-08          | 1.50E-05            | 3.77E-07           | -5.79919        |
| 227490_at          | 204942_s_at | 1.90E-07          | 3.42E-05            | 8.11E-07           | 5.61136         |
| 1555270_a_at       | 204942_s_at | 2.44E-07          | 4.39E-05            | 9.81E-07           | 5.55428         |
| 222018_at          | 204942_s_at | 7.29E-07          | 0.000131308         | 2.78E-06           | -5.29883        |
| 226671_at          | 204942_s_at | 1.28E-06          | 0.000230969         | 4.65E-06           | 5.16494         |
| 229407_at          | 204942_s_at | 1.76E-06          | 0.000316747         | 6.08E-06           | -5.08929        |
| 1557129_a_at       | 204942_s_at | 6.08E-06          | 0.001094007         | 1.94E-05           | -4.7865         |
| 230334_at          | 204942_s_at | 6.15E-06          | 0.001107897         | 1.94E-05           | -4.78336        |
| 226448_at          | 204942_s_at | 1.64E-05          | 0.002948667         | 4.95E-05           | 4.53657         |
| 202270_at          | 204942_s_at | 2.58E-05          | 0.004645457         | 7.48E-05           | 4.41936         |
| 1564907_s_at       | 204942_s_at | 5.07E-05          | 0.00912843          | 0.000141413        | -4.24173        |
| 202269_x_at        | 204942_s_at | 5.45E-05          | 0.009817746         | 0.000146458        | 4.22232         |
| 231577_s_at        | 204942_s_at | 6.94E-05          | 0.012495086         | 0.000179741        | 4.15764         |
| 230306_at          | 204942_s_at | 9.83E-05          | 0.017698792         | 0.000245817        | -4.06317        |
| 212425_at          | 204942_s_at | 0.000126919       | 0.022845341         | 0.00030672         | 3.99305         |
| 205968_at          | 204942_s_at | 0.000169282       | 0.030470809         | 0.000395902        | -3.91299        |
| 218611_at          | 204942_s_at | 0.000318964       | 0.057413433         | 0.000722652        | 3.73314         |
| 210787_s_at        | 204942_s_at | 0.000355523       | 0.063994181         | 0.000781074        | -3.70178        |
| 200974_at          | 204942_s_at | 0.000366606       | 0.065989136         | 0.000781734        | 3.69288         |
| 209156_s_at        | 204942_s_at | 0.000389193       | 0.070054763         | 0.000806186        | 3.6755          |
| 231029_at          | 204942_s_at | 0.000453328       | 0.081599022         | 0.000912952        | -3.63092        |
| 230896_at          | 204942_s_at | 0.000520426       | 0.0936766           | 0.001019753        | -3.59027        |
| 219122_s_at        | 204942_s_at | 0.000620874       | 0.111757319         | 0.001184562        | -3.53785        |
| 213778_x_at        | 204942_s_at | 0.000781638       | 0.140694844         | 0.001453045        | -3.46869        |
| 205680_at          | 204942_s_at | 0.000911421       | 0.164055869         | 0.001651951        | -3.42204        |
| 202132_at          | 204942_s_at | 0.00100496        | 0.180892828         | 0.001777064        | 3.39215         |
| 223741_s_at        | 204942_s_at | 0.00113688        | 0.204639011         | 0.001962477        | 3.35417         |
| 205726_at          | 204942_s_at | 0.00123659        | 0.222586929         | 0.002084955        | -3.32811        |
| 221261_x_at        | 204942_s_at | 0.00134404        | 0.241927416         | 0.002214613        | 3.30215         |
| 238127_at          | 204942_s_at | 0.0022215         | 0.399869587         | 0.00357908         | -3.14259        |
| 238619_at          | 204942_s_at | 0.00232609        | 0.418695929         | 0.003666118        | 3.12771         |
| <b>238339_x_at</b> | 204942_s_at | <b>0.00264035</b> | <b>0.475262166</b>  | <b>0.004072873</b> | <b>-3.08647</b> |
| 227010_at          | 204942_s_at | 0.00278841        | 0.501914481         | 0.004183293        | -3.0686         |
| 242445_at          | 204942_s_at | 0.00282733        | 0.508919237         | 0.004183293        | 3.06405         |
| 230762_at          | 204942_s_at | 0.0045972         | 0.827496685         | 0.006665946        | 2.9014          |
| 221919_at          | 204942_s_at | 0.00481556        | 0.8668001           | 0.006845643        | -2.88554        |

|              |             |            |            |             |          |
|--------------|-------------|------------|------------|-------------|----------|
| 204695_at    | 204942_s_at | 0.00548477 | 0.98725928 | 0.00764704  | -2.84077 |
| 200756_x_at  | 204942_s_at | 0.0063946  | 1          | 0.00863232  | -2.78734 |
| 221208_s_at  | 204942_s_at | 0.00642959 | 1          | 0.00863232  | 2.78542  |
| 236229_at    | 204942_s_at | 0.00659372 | 1          | 0.008691724 | 2.77658  |
| 202551_s_at  | 204942_s_at | 0.00683055 | 1          | 0.008843116 | 2.76416  |
| 218523_at    | 204942_s_at | 0.00857204 | 1          | 0.010903039 | 2.6833   |
| 204624_at    | 204942_s_at | 0.00963929 | 1          | 0.012049109 | -2.64085 |
| 205776_at    | 204942_s_at | 0.0106328  | 1          | 0.013065713 | -2.60501 |
| 227997_at    | 204942_s_at | 0.0108732  | 1          | 0.013138474 | 2.59679  |
| 240278_at    | 204942_s_at | 0.0129038  | 1          | 0.015198108 | -2.53326 |
| 239242_at    | 204942_s_at | 0.012997   | 1          | 0.015198108 | -2.53056 |
| 214291_at    | 204942_s_at | 0.0138966  | 1          | 0.01599216  | -2.50541 |
| 243724_at    | 204942_s_at | 0.0148563  | 1          | 0.016829353 | 2.48014  |
| 219301_s_at  | 204942_s_at | 0.0156092  | 1          | 0.017410291 | 2.46132  |
| 228489_at    | 204942_s_at | 0.0168849  | 1          | 0.018547855 | -2.4312  |
| 214038_at    | 204942_s_at | 0.0186459  | 1          | 0.020176507 | -2.3928  |
| 243063_at    | 204942_s_at | 0.0193128  | 1          | 0.02059088  | -2.3791  |
| 217099_s_at  | 204942_s_at | 0.0207164  | 1          | 0.021767221 | -2.35157 |
| 204384_at    | 204942_s_at | 0.0242665  | 1          | 0.025133195 | -2.2887  |
| 244116_at    | 204942_s_at | 0.0247806  | 1          | 0.025304173 | -2.28027 |
| 202552_s_at  | 204942_s_at | 0.0290222  | 1          | 0.029223773 | 2.2161   |
| 224327_s_at  | 204942_s_at | 0.0310332  | 1          | 0.030661658 | 2.18851  |
| 202238_s_at  | 204942_s_at | 0.031296   | 1          | 0.030661658 | -2.18501 |
| 238526_at    | 204942_s_at | 0.0337488  | 1          | 0.032623795 | -2.15362 |
| 206143_at    | 204942_s_at | 0.0357737  | 1          | 0.034126225 | 2.12915  |
| 1554348_s_at | 204942_s_at | 0.0379664  | 1          | 0.035747592 | -2.10398 |
| 241360_at    | 204942_s_at | 0.0492413  | 1          | 0.045110648 | -1.99147 |
| 240110_at    | 204942_s_at | 0.0499523  | 1          | 0.045110648 | 1.98514  |
| 229370_at    | 204942_s_at | 0.0501724  | 1          | 0.045110648 | -1.9832  |
| 235974_at    | 204942_s_at | 0.0505908  | 1          | 0.045110648 | -1.97953 |
| 214845_s_at  | 204942_s_at | 0.0510217  | 1          | 0.045110648 | -1.97577 |
| 208181_at    | 204942_s_at | 0.0574837  | 1          | 0.050211684 | -1.92244 |
| 231468_at    | 204942_s_at | 0.058506   | 1          | 0.050496267 | 1.91448  |
| 230631_s_at  | 204942_s_at | 0.0656153  | 1          | 0.055966007 | 1.86211  |
| 203294_s_at  | 204942_s_at | 0.0712061  | 1          | 0.060028386 | -1.82416 |
| 228496_s_at  | 204942_s_at | 0.0733113  | 1          | 0.061092731 | 1.81052  |
| 1561542_at   | 204942_s_at | 0.0796532  | 1          | 0.065623359 | -1.77129 |
| 238920_at    | 204942_s_at | 0.0827164  | 1          | 0.067093927 | -1.75326 |
| 239615_at    | 204942_s_at | 0.083289   | 1          | 0.067093927 | 1.74995  |
| 241652_x_at  | 204942_s_at | 0.0884187  | 1          | 0.070443493 | -1.72111 |
| 204696_s_at  | 204942_s_at | 0.102011   | 1          | 0.080388988 | -1.65081 |
| 1552266_at   | 204942_s_at | 0.109598   | 1          | 0.085439182 | -1.61482 |
| 226592_at    | 204942_s_at | 0.110782   | 1          | 0.085443838 | -1.60938 |
| 201289_at    | 204942_s_at | 0.121403   | 1          | 0.09264992  | 1.5626   |
| 231011_at    | 204942_s_at | 0.125231   | 1          | 0.094575201 | -1.54654 |
| 206984_s_at  | 204942_s_at | 0.129804   | 1          | 0.09553919  | -1.52785 |
| 206085_s_at  | 204942_s_at | 0.130121   | 1          | 0.09553919  | -1.52657 |
| 215253_s_at  | 204942_s_at | 0.13046    | 1          | 0.09553919  | -1.52521 |
| 222315_at    | 204942_s_at | 0.132446   | 1          | 0.096023516 | -1.51729 |
| 229590_at    | 204942_s_at | 0.133788   | 1          | 0.096036072 | -1.51199 |
| 210764_s_at  | 204942_s_at | 0.135865   | 1          | 0.096570903 | 1.50386  |
| 217013_at    | 204942_s_at | 0.161016   | 1          | 0.112393761 | 1.41246  |

|              |             |          |   |             |           |
|--------------|-------------|----------|---|-------------|-----------|
| 235405_at    | 204942_s_at | 0.162392 | 1 | 0.112393761 | 1.40778   |
| 221737_at    | 204942_s_at | 0.162777 | 1 | 0.112393761 | -1.40648  |
| 227048_at    | 204942_s_at | 0.165484 | 1 | 0.113184748 | -1.39739  |
| 218825_at    | 204942_s_at | 0.170095 | 1 | 0.11514829  | -1.38217  |
| 227019_at    | 204942_s_at | 0.171531 | 1 | 0.11514829  | 1.37749   |
| 227126_at    | 204942_s_at | 0.181899 | 1 | 0.120987835 | 1.34457   |
| 244786_at    | 204942_s_at | 0.189098 | 1 | 0.124632449 | -1.32254  |
| 222304_x_at  | 204942_s_at | 0.193997 | 1 | 0.126709837 | 1.3079    |
| 204795_at    | 204942_s_at | 0.204528 | 1 | 0.131234465 | 1.27735   |
| 238573_at    | 204942_s_at | 0.204545 | 1 | 0.131234465 | -1.2773   |
| 239342_at    | 204942_s_at | 0.211015 | 1 | 0.134197947 | -1.2591   |
| 235173_at    | 204942_s_at | 0.214108 | 1 | 0.134981115 | 1.25055   |
| 231926_at    | 204942_s_at | 0.221708 | 1 | 0.138567472 | -1.2299   |
| 228603_at    | 204942_s_at | 0.242077 | 1 | 0.150005104 | 1.177     |
| 230133_at    | 204942_s_at | 0.28934  | 1 | 0.176278819 | -1.0654   |
| 203265_s_at  | 204942_s_at | 0.296984 | 1 | 0.179428114 | 1.04856   |
| 208352_x_at  | 204942_s_at | 0.303603 | 1 | 0.181910635 | -1.03422  |
| 214870_x_at  | 204942_s_at | 0.313436 | 1 | 0.186263446 | -1.0133   |
| 239877_at    | 204942_s_at | 0.32617  | 1 | 0.192254392 | -0.986854 |
| 233230_s_at  | 204942_s_at | 0.333018 | 1 | 0.194707899 | 0.972911  |
| 216960_s_at  | 204942_s_at | 0.337346 | 1 | 0.195660655 | 0.964195  |
| 239642_at    | 204942_s_at | 0.359904 | 1 | 0.20546044  | -0.919905 |
| 1553346_a_at | 204942_s_at | 0.35991  | 1 | 0.20546044  | 0.919894  |
| 208782_at    | 204942_s_at | 0.371571 | 1 | 0.210460392 | 0.897694  |
| 1560071_a_at | 204942_s_at | 0.374934 | 1 | 0.210718999 | -0.891374 |
| 206463_s_at  | 204942_s_at | 0.390556 | 1 | 0.217810347 | -0.86247  |
| 220080_at    | 204942_s_at | 0.412512 | 1 | 0.228298463 | -0.823027 |
| 225727_at    | 204942_s_at | 0.426399 | 1 | 0.234196351 | -0.798729 |
| 229443_at    | 204942_s_at | 0.440377 | 1 | 0.237480453 | -0.774741 |
| 232345_at    | 204942_s_at | 0.441191 | 1 | 0.237480453 | -0.773358 |
| 204896_s_at  | 204942_s_at | 0.442205 | 1 | 0.237480453 | -0.771637 |
| 205020_s_at  | 204942_s_at | 0.468745 | 1 | 0.249882457 | 0.72738   |
| 1563469_at   | 204942_s_at | 0.47231  | 1 | 0.249944887 | 0.721545  |
| 242722_at    | 204942_s_at | 0.482593 | 1 | 0.253536224 | 0.704849  |
| 241837_at    | 204942_s_at | 0.491424 | 1 | 0.255727275 | 0.690667  |
| 228806_at    | 204942_s_at | 0.498942 | 1 | 0.255727275 | -0.678704 |
| 220031_at    | 204942_s_at | 0.500745 | 1 | 0.255727275 | -0.675849 |
| 202134_s_at  | 204942_s_at | 0.500873 | 1 | 0.255727275 | 0.675646  |
| 226064_s_at  | 204942_s_at | 0.514565 | 1 | 0.260880641 | -0.654148 |
| 1554531_at   | 204942_s_at | 0.54868  | 1 | 0.275858015 | 0.601847  |
| 213422_s_at  | 204942_s_at | 0.551716 | 1 | 0.275858015 | -0.597274 |
| 216307_at    | 204942_s_at | 0.573963 | 1 | 0.285016044 | -0.564136 |
| 225726_s_at  | 204942_s_at | 0.580902 | 1 | 0.286499188 | -0.55393  |
| 233002_at    | 204942_s_at | 0.590707 | 1 | 0.287262491 | -0.539604 |
| 220016_at    | 204942_s_at | 0.592943 | 1 | 0.287262491 | 0.536352  |
| 228702_at    | 204942_s_at | 0.598255 | 1 | 0.287262491 | 0.528651  |
| 220363_s_at  | 204942_s_at | 0.598298 | 1 | 0.287262491 | 0.528588  |
| 232797_at    | 204942_s_at | 0.604046 | 1 | 0.288114097 | -0.520291 |
| 214222_at    | 204942_s_at | 0.612752 | 1 | 0.290356237 | 0.507792  |
| 214947_at    | 204942_s_at | 0.623651 | 1 | 0.293601748 | 0.492256  |
| 232348_at    | 204942_s_at | 0.642777 | 1 | 0.300653965 | -0.465275 |
| 225731_at    | 204942_s_at | 0.665204 | 1 | 0.307247483 | 0.434067  |

|              |             |          |   |             |           |
|--------------|-------------|----------|---|-------------|-----------|
| 215145_s_at  | 204942_s_at | 0.66535  | 1 | 0.307247483 | 0.433865  |
| 235526_at    | 204942_s_at | 0.679541 | 1 | 0.311814696 | 0.414339  |
| 231399_at    | 204942_s_at | 0.775632 | 1 | 0.350588279 | -0.285812 |
| 230443_at    | 204942_s_at | 0.776512 | 1 | 0.350588279 | -0.28466  |
| 1552685_a_at | 204942_s_at | 0.778548 | 1 | 0.350588279 | 0.281995  |
| 204077_x_at  | 204942_s_at | 0.789255 | 1 | 0.352183965 | -0.268017 |
| 238228_at    | 204942_s_at | 0.795824 | 1 | 0.352183965 | 0.259468  |
| 1554522_at   | 204942_s_at | 0.796664 | 1 | 0.352183965 | -0.258376 |
| 205131_x_at  | 204942_s_at | 0.821843 | 1 | 0.361112636 | 0.225786  |
| 238853_at    | 204942_s_at | 0.832839 | 1 | 0.363739826 | -0.211631 |
| 215064_at    | 204942_s_at | 0.851729 | 1 | 0.369762398 | 0.187413  |
| 235360_at    | 204942_s_at | 0.863898 | 1 | 0.370636629 | 0.171869  |
| 207980_s_at  | 204942_s_at | 0.863967 | 1 | 0.370636629 | -0.171782 |
| 235125_x_at  | 204942_s_at | 0.884635 | 1 | 0.377270746 | 0.145479  |
| 226848_at    | 204942_s_at | 0.895422 | 1 | 0.379637798 | -0.131792 |
| 1561595_x_at | 204942_s_at | 0.904086 | 1 | 0.379892516 | 0.120817  |
| 222412_s_at  | 204942_s_at | 0.912842 | 1 | 0.379892516 | -0.109741 |
| 229677_at    | 204942_s_at | 0.913435 | 1 | 0.379892516 | 0.108991  |
| 217826_s_at  | 204942_s_at | 0.916982 | 1 | 0.379892516 | 0.104508  |
| 239045_at    | 204942_s_at | 0.922434 | 1 | 0.379979756 | 0.097622  |
| 209357_at    | 204942_s_at | 0.93139  | 1 | 0.381501475 | 0.08632   |
| 242739_at    | 204942_s_at | 0.937408 | 1 | 0.38180928  | 0.078732  |
| 1556678_a_at | 204942_s_at | 0.955441 | 1 | 0.386980437 | 0.05602   |
| 205391_x_at  | 204942_s_at | 0.994622 | 1 | 0.400611492 | -0.006758 |

red text probe sets with absent call on all samples

| Mean(N-nc) | Mean(Y-ca) | MeanRatio(N/Y) | MeanDiff(N-Y) | MeanDiff(Y-N) | FoldDiff(Y/N) | FoldDiff(Y/Nsigned) |
|------------|------------|----------------|---------------|---------------|---------------|---------------------|
| 8.85407    | 4.29417    | 2.06188        | 4.55991       | -4.5599       | 0.042396824   | -23.58667252        |
| 3.92593    | 6.61917    | 0.593115       | -2.69324      | 2.69324       | 6.467642788   | 6.467642788         |
| 4.92222    | 2.80306    | 1.75602        | 2.11917       | -2.11916      | 0.230180895   | -4.344409209        |
| 6.66296    | 5.61694    | 1.18623        | 1.04602       | -1.04602      | 0.484302381   | -2.064825695        |
| 4.52556    | 2.67417    | 1.69232        | 1.85139       | -1.85139      | 0.277125236   | -3.608476852        |
| 2.02296    | 2.87806    | 0.702892       | -0.855093     | 0.8551        | 1.808884133   | 1.808884133         |
| 2.69889    | 4.705      | 0.573621       | -2.00611      | 2.00611       | 4.01697644    | 4.01697644          |
| 2.67037    | 4.46236    | 0.598421       | -1.79199      | 1.79199       | 3.462922259   | 3.462922259         |
| 3.61889    | 4.54347    | 0.796503       | -0.924583     | 0.92458       | 1.898131574   | 1.898131574         |
| 7.37296    | 8.10444    | 0.909743       | -0.731482     | 0.73148       | 1.660341493   | 1.660341493         |
| 5.36407    | 3.62056    | 1.48156        | 1.74352       | -1.74351      | 0.298642211   | -3.348488469        |
| 6.66148    | 7.51917    | 0.885933       | -0.857685     | 0.85769       | 1.812134451   | 1.812134451         |
| 5.53667    | 4.87514    | 1.13569        | 0.661528      | -0.66153      | 0.632207476   | -1.581759214        |
| 4.61852    | 5.33514    | 0.865679       | -0.71662      | 0.71662       | 1.643327472   | 1.643327472         |
| 4.46296    | 5.80014    | 0.769458       | -1.33718      | 1.33718       | 2.526569735   | 2.526569735         |
| 3.70185    | 3.24806    | 1.13971        | 0.453796      | -0.45379      | 0.730122275   | -1.3696336          |
| 3.23481    | 2.70264    | 1.19691        | 0.532176      | -0.53217      | 0.691513825   | -1.446102686        |
| 6.95185    | 7.71889    | 0.900629       | -0.767037     | 0.76704       | 1.701774642   | 1.701774642         |
| 8.8837     | 7.83347    | 1.13407        | 1.05023       | -1.05023      | 0.482891174   | -2.070859966        |
| 2.67704    | 4.22875    | 0.633056       | -1.55171      | 1.55171       | 2.931644157   | 2.931644157         |
| 1.92222    | 2.59583    | 0.740503       | -0.673611     | 0.67361       | 1.595059233   | 1.595059233         |
| 3.22741    | 3.63042    | 0.888991       | -0.403009     | 0.40301       | 1.32226377    | 1.32226377          |
| 2.58741    | 2.21278    | 1.1693         | 0.37463       | -0.37463      | 0.771303199   | -1.296507004        |
| 8.18593    | 6.74444    | 1.21373        | 1.44148       | -1.44149      | 0.368186848   | -2.716012275        |
| 2.91259    | 3.30694    | 0.88075        | -0.394352     | 0.39435       | 1.314350452   | 1.314350452         |
| 8.18815    | 6.73375    | 1.21599        | 1.4544        | -1.4544       | 0.364906815   | -2.740425662        |
| 8.36185    | 6.94375    | 1.20423        | 1.4181        | -1.4181       | 0.374204808   | -2.672333382        |
| 6.24889    | 6.74944    | 0.925838       | -0.500556     | 0.50055       | 1.414752807   | 1.414752807         |
| 3.81667    | 3.33625    | 1.144          | 0.480417      | -0.48042      | 0.716768927   | -1.395149766        |
| 5.66481    | 6.79306    | 0.833913       | -1.12824      | 1.12825       | 2.185934239   | 2.185934239         |
| 5.92704    | 5.20014    | 1.13978        | 0.726898      | -0.7269       | 0.6042008     | -1.655078907        |
| 2.94222    | 3.72389    | 0.790094       | -0.781667     | 0.78167       | 1.719119699   | 1.719119699         |
| 12.6074    | 11.9118    | 1.0584         | 0.695602      | -0.6956       | 0.617452474   | -1.619557848        |
| 7.19778    | 6.11694    | 1.17669        | 1.08083       | -1.08084      | 0.472753486   | -2.115267324        |
| 2.4063     | 3.97528    | 0.605315       | -1.56898      | 1.56898       | 2.966948737   | 2.966948737         |
| 7.83778    | 8.87292    | 0.883337       | -1.03514      | 1.03514       | 2.049312503   | 2.049312503         |
| 5.50593    | 6.01333    | 0.91562        | -0.507407     | 0.5074        | 1.421486108   | 1.421486108         |
| 2.78111    | 3.12917    | 0.888771       | -0.348056     | 0.34806       | 1.27284787    | 1.27284787          |
| 2.3963     | 3.78333    | 0.633382       | -1.38704      | 1.38703       | 2.615397082   | 2.615397082         |
| 7.65815    | 7.11417    | 1.07646        | 0.543981      | -0.54398      | 0.685876152   | -1.457989167        |
| 5.96222    | 5.34333    | 1.11582        | 0.618889      | -0.61889      | 0.651171742   | -1.535693174        |
| 7.62296    | 8.17611    | 0.932346       | -0.553148     | 0.55315       | 1.467285893   | 1.467285893         |
| 7.66444    | 6.11903    | 1.25256        | 1.54542       | -1.54541      | 0.342598324   | -2.918870085        |
| 3.12444    | 3.88056    | 0.805154       | -0.756111     | 0.75612       | 1.688942251   | 1.688942251         |
| 4.68815    | 4.15458    | 1.12843        | 0.533565      | -0.53357      | 0.690843101   | -1.447506674        |
| 1.90444    | 2.045      | 0.931269       | -0.140556     | 0.14056       | 1.102332917   | 1.102332917         |
| 1.72111    | 1.88556    | 0.912787       | -0.164444     | 0.16445       | 1.120738736   | 1.120738736         |
| 1.8763     | 1.74472    | 1.07541        | 0.131574      | -0.13158      | 0.912831195   | -1.095492798        |
| 3.79222    | 3.38458    | 1.12044        | 0.407639      | -0.40764      | 0.753855543   | -1.32651409         |
| 5.03667    | 5.33792    | 0.943564       | -0.30125      | 0.30125       | 1.232211581   | 1.232211581         |

|         |         |          |            |          |             |              |
|---------|---------|----------|------------|----------|-------------|--------------|
| 3.96852 | 4.34639 | 0.913061 | -0.37787   | 0.37787  | 1.299421967 | 1.299421967  |
| 3.89815 | 4.18542 | 0.931364 | -0.287268  | 0.28727  | 1.220328873 | 1.220328873  |
| 6.75963 | 6.29792 | 1.07331  | 0.461713   | -0.46171 | 0.726125086 | -1.377173189 |
| 6.86037 | 6.31944 | 1.0856   | 0.540926   | -0.54093 | 0.687327696 | -1.454910089 |
| 7.84444 | 7.44847 | 1.05316  | 0.395972   | -0.39597 | 0.759978231 | -1.315827163 |
| 3.24222 | 3.09931 | 1.04611  | 0.142917   | -0.14291 | 0.905690481 | -1.104129966 |
| 4.3537  | 4.88208 | 0.891772 | -0.52838   | 0.52838  | 1.44230872  | 1.44230872   |
| 3.13778 | 4.24722 | 0.738784 | -1.10944   | 1.10944  | 2.157618804 | 2.157618804  |
| 6.62333 | 5.78764 | 1.14439  | 0.835694   | -0.83569 | 0.560314992 | -1.784710411 |
| 2.05963 | 2.25125 | 0.914883 | -0.19162   | 0.19162  | 1.142045397 | 1.142045397  |
| 2.18111 | 2.53903 | 0.859034 | -0.357917  | 0.35792  | 1.281576856 | 1.281576856  |
| 4.25889 | 4.76139 | 0.894464 | -0.5025    | 0.5025   | 1.416666332 | 1.416666332  |
| 4.45889 | 4.30819 | 1.03498  | 0.150694   | -0.1507  | 0.900813279 | -1.110107969 |
| 9.56185 | 8.94069 | 1.06948  | 0.621157   | -0.62116 | 0.650147966 | -1.538111404 |
| 2.10481 | 2.80403 | 0.75064  | -0.699213  | 0.69922  | 1.623626734 | 1.623626734  |
| 2.55519 | 3.04514 | 0.839103 | -0.489954  | 0.48995  | 1.404396202 | 1.404396202  |
| 3.39222 | 3.96375 | 0.855811 | -0.571528  | 0.57153  | 1.486098766 | 1.486098766  |
| 4.0463  | 4.52319 | 0.894566 | -0.476898  | 0.47689  | 1.391740273 | 1.391740273  |
| 6.20778 | 6.60431 | 0.939959 | -0.396528  | 0.39653  | 1.316338017 | 1.316338017  |
| 5.42889 | 6.20181 | 0.875372 | -0.772917  | 0.77292  | 1.708724727 | 1.708724727  |
| 8.15259 | 7.85653 | 1.03768  | 0.296065   | -0.29606 | 0.814473689 | -1.227786745 |
| 2.71889 | 2.54597 | 1.06792  | 0.172917   | -0.17292 | 0.887045492 | -1.127337898 |
| 4.18444 | 4.70639 | 0.889099 | -0.521944  | 0.52195  | 1.435894745 | 1.435894745  |
| 7.12778 | 7.37514 | 0.96646  | -0.247361  | 0.24736  | 1.187032965 | 1.187032965  |
| 4.01148 | 2.95292 | 1.35848  | 1.05856    | -1.05856 | 0.480111035 | -2.082851523 |
| 1.97185 | 2.22042 | 0.888055 | -0.248565  | 0.24857  | 1.188028956 | 1.188028956  |
| 2.58815 | 2.94167 | 0.879824 | -0.353519  | 0.35352  | 1.277674197 | 1.277674197  |
| 3.12704 | 2.77681 | 1.12613  | 0.350231   | -0.35023 | 0.784459026 | -1.274763839 |
| 3.29556 | 3.54319 | 0.930109 | -0.247639  | 0.24763  | 1.187255138 | 1.187255138  |
| 2.48222 | 2.75389 | 0.901352 | -0.271667  | 0.27167  | 1.207204426 | 1.207204426  |
| 3.8837  | 4.26236 | 0.911163 | -0.378657  | 0.37866  | 1.300133708 | 1.300133708  |
| 1.94593 | 2.03958 | 0.95408  | -0.0936574 | 0.09365  | 1.067066435 | 1.067066435  |
| 3.34667 | 2.99931 | 1.11581  | 0.347361   | -0.34736 | 0.786021129 | -1.272230431 |
| 3.01037 | 2.76194 | 1.08995  | 0.248426   | -0.24843 | 0.841812011 | -1.187913675 |
| 2.29444 | 2.36625 | 0.969654 | -0.0718056 | 0.07181  | 1.051034481 | 1.051034481  |
| 9.22593 | 8.98931 | 1.02632  | 0.23662    | -0.23662 | 0.848731425 | -1.178229026 |
| 3.52222 | 3.97819 | 0.885382 | -0.455972  | 0.45597  | 1.371704764 | 1.371704764  |
| 2.82556 | 3.04181 | 0.928907 | -0.21625   | 0.21625  | 1.161710023 | 1.161710023  |
| 3.0837  | 2.89306 | 1.0659   | 0.190648   | -0.19064 | 0.876216933 | -1.141269887 |
| 1.93778 | 2.07486 | 0.933931 | -0.137083  | 0.13708  | 1.099677127 | 1.099677127  |
| 1.95481 | 2.03764 | 0.959353 | -0.0828241 | 0.08283  | 1.059093529 | 1.059093529  |
| 2.37481 | 2.60764 | 0.910715 | -0.232824  | 0.23283  | 1.175137848 | 1.175137848  |
| 3.65815 | 3.97514 | 0.920257 | -0.316991  | 0.31699  | 1.245728781 | 1.245728781  |
| 10.1474 | 9.80569 | 1.03485  | 0.341713   | -0.34171 | 0.789105445 | -1.267257762 |
| 2.69407 | 2.84556 | 0.946766 | -0.151482  | 0.15149  | 1.110716016 | 1.110716016  |
| 1.51148 | 1.58597 | 0.953031 | -0.0744907 | 0.07449  | 1.052988733 | 1.052988733  |
| 1.66074 | 1.72    | 0.965547 | -0.0592593 | 0.05926  | 1.041931187 | 1.041931187  |
| 2.03481 | 2.11667 | 0.96133  | -0.0818519 | 0.08186  | 1.058381684 | 1.058381684  |
| 3.47259 | 3.74889 | 0.926299 | -0.276296  | 0.2763   | 1.211084896 | 1.211084896  |
| 7.37037 | 7.65944 | 0.962259 | -0.289074  | 0.28907  | 1.221852385 | 1.221852385  |
| 6.26444 | 5.86556 | 1.06801  | 0.398889   | -0.39888 | 0.758446856 | -1.318483942 |
| 2.74815 | 2.62569 | 1.04664  | 0.122454   | -0.12246 | 0.918619937 | -1.088589481 |

|                |                |                 |                   |                 |                    |                     |
|----------------|----------------|-----------------|-------------------|-----------------|--------------------|---------------------|
| 7.63963        | 7.25056        | 1.05366         | 0.389074          | -0.38907        | 0.763621697        | -1.309548961        |
| 6.91111        | 7.03569        | 0.982293        | -0.124583         | 0.12458         | 1.090190308        | 1.090190308         |
| 1.50185        | 1.65292        | 0.908607        | -0.151065         | 0.15107         | 1.110392709        | 1.110392709         |
| 3.31519        | 3.44681        | 0.961814        | -0.13162          | 0.13162         | 1.095523172        | 1.095523172         |
| 3.1537         | 2.99931        | 1.05148         | 0.154398          | -0.15439        | 0.898512201        | -1.112950941        |
| 2.83333        | 2.58556        | 1.09583         | 0.247778          | -0.24777        | 0.842197209        | -1.187370356        |
| 4.50037        | 4.76444        | 0.944574        | -0.264074         | 0.26407         | 1.200861692        | 1.200861692         |
| 6.30481        | 5.91639        | 1.06565         | 0.388426          | -0.38842        | 0.763965821        | -1.308959083        |
| 2.30519        | 2.22111        | 1.03785         | 0.0840741         | -0.08408        | 0.943385937        | -1.060011561        |
| 4.28           | 4.51           | 0.949002        | -0.23             | 0.23            | 1.172834949        | 1.172834949         |
| 1.74741        | 1.78444        | 0.979245        | -0.037037         | 0.03703         | 1.02599948         | 1.02599948          |
| 5.62481        | 5.41583        | 1.03859         | 0.208981          | -0.20898        | 0.865148684        | -1.155870683        |
| 2.10556        | 2.19347        | 0.959919        | -0.0879167        | 0.08791         | 1.06282937         | 1.06282937          |
| 6.04778        | 5.84264        | 1.03511         | 0.205139          | -0.20514        | 0.867454505        | -1.15279821         |
| 2.23111        | 2.30319        | 0.968703        | -0.0720833        | 0.07208         | 1.0512312          | 1.0512312           |
| 3.87556        | 3.73556        | 1.03748         | 0.14              | -0.14           | 0.907519155        | -1.101905116        |
| 2.57778        | 2.67556        | 0.963455        | -0.0977778        | 0.09778         | 1.0701255          | 1.0701255           |
| 9.67111        | 9.76514        | 0.990371        | -0.0940278        | 0.09403         | 1.067347533        | 1.067347533         |
| 1.6863         | 1.71111        | 0.985498        | -0.0248148        | 0.02481         | 1.017345701        | 1.017345701         |
| 2.06926        | 1.97931        | 1.04545         | 0.0899537         | -0.08995        | 0.939555311        | -1.064333295        |
| 6.88593        | 6.78389        | 1.01504         | 0.102037          | -0.10204        | 0.931714596        | -1.073290044        |
| 1.99889        | 2.05486        | 0.972761        | -0.0559722        | 0.05597         | 1.039557818        | 1.039557818         |
| 1.56778        | 1.53819        | 1.01923         | 0.0295833         | -0.02959        | 0.979698679        | -1.020722005        |
| 11.8126        | 11.6965        | 1.00992         | 0.116065          | -0.1161         | 0.922678535        | -1.083801088        |
| 1.77926        | 1.85292        | 0.960248        | -0.0736574        | 0.07366         | 1.05238311         | 1.05238311          |
| <b>2.23667</b> | <b>2.28375</b> | <b>0.979383</b> | <b>-0.0470833</b> | <b>0.04708</b>  | <b>1.033171677</b> | <b>1.033171677</b>  |
| 1.84963        | 1.91569        | 0.965514        | -0.0660648        | 0.06606         | 1.046853818        | 1.046853818         |
| 7.27704        | 7.4425         | 0.977768        | -0.165463         | 0.16546         | 1.121523616        | 1.121523616         |
| 2.28407        | 2.36708        | 0.964932        | -0.0830092        | 0.08301         | 1.059225677        | 1.059225677         |
| <b>2.14037</b> | <b>2.17167</b> | <b>0.985589</b> | <b>-0.0312963</b> | <b>0.0313</b>   | <b>1.021932566</b> | <b>1.021932566</b>  |
| <b>1.59111</b> | <b>1.61403</b> | <b>0.985802</b> | <b>-0.0229167</b> | <b>0.02292</b>  | <b>1.016013802</b> | <b>1.016013802</b>  |
| 7.40333        | 7.26222        | 1.01943         | 0.141111          | -0.14111        | 0.906821185        | -1.102753241        |
| 2.90519        | 2.795          | 1.03942         | 0.110185          | -0.11019        | 0.92646604         | -1.079370378        |
| 7.82519        | 7.66069        | 1.02147         | 0.164491          | -0.1645         | 0.892237692        | -1.120777579        |
| 5.57333        | 5.3875         | 1.03449         | 0.185833          | -0.18583        | 0.879143149        | -1.137471186        |
| 7.15556        | 7.28222        | 0.982606        | -0.126667         | 0.12666         | 1.09176322         | 1.09176322          |
| <b>1.79259</b> | <b>1.81111</b> | <b>0.989775</b> | <b>-0.0185185</b> | <b>0.01852</b>  | <b>1.012919835</b> | <b>1.012919835</b>  |
| <b>2.4137</b>  | <b>2.36639</b> | <b>1.01999</b>  | <b>0.0473148</b>  | <b>-0.04731</b> | <b>0.967739061</b> | <b>-1.033336403</b> |
| 2.53185        | 2.62875        | 0.963139        | -0.0968981        | 0.0969          | 1.069472955        | 1.069472955         |
| 2.23889        | 2.19889        | 1.01819         | 0.04              | -0.04           | 0.972654947        | -1.028113827        |
| 4.83185        | 4.93486        | 0.979126        | -0.103009         | 0.10301         | 1.074011916        | 1.074011916         |
| 1.60259        | 1.62014        | 0.98917         | -0.0175463        | 0.01755         | 1.012239024        | 1.012239024         |
| 9.30259        | 9.39486        | 0.990179        | -0.0922684        | 0.09227         | 1.066046228        | 1.066046228         |
| 1.72593        | 1.76917        | 0.975559        | -0.0432407        | 0.04324         | 1.030425356        | 1.030425356         |
| 2.94296        | 2.88069        | 1.02162         | 0.0622685         | -0.06227        | 0.957755958        | -1.044107314        |
| 7.25148        | 7.15222        | 1.01388         | 0.0992592         | -0.09926        | 0.933511694        | -1.07122386         |
| 2.14704        | 2.11319        | 1.01601         | 0.0338426         | -0.03385        | 0.976810085        | -1.023740454        |
| 2.82148        | 2.90431        | 0.971482        | -0.0828241        | 0.08283         | 1.059093529        | 1.059093529         |
| 3.40852        | 3.31597        | 1.02791         | 0.0925463         | -0.09255        | 0.937863586        | -1.066253147        |
| 2.0063         | 1.92639        | 1.04148         | 0.0799074         | -0.07991        | 0.946116667        | -1.056952102        |
| 1.96444        | 1.98264        | 0.990823        | -0.0181944        | 0.0182          | 1.012695187        | 1.012695187         |
| 8.43           | 8.36306        | 1.008           | 0.0669445         | -0.06694        | 0.954660717        | -1.047492562        |

|         |         |          |              |          |             |              |
|---------|---------|----------|--------------|----------|-------------|--------------|
| 3.59148 | 3.47597 | 1.03323  | 0.115509     | -0.11551 | 0.923055948 | -1.08335795  |
| 4.87704 | 4.81181 | 1.01356  | 0.0652314    | -0.06523 | 0.955792929 | -1.046251724 |
| 4.39926 | 4.47361 | 0.98338  | -0.0743518   | 0.07435  | 1.052886556 | 1.052886556  |
| 2.39481 | 2.41875 | 0.990104 | -0.0239352   | 0.02394  | 1.016732388 | 1.016732388  |
| 1.69185 | 1.68292 | 1.00531  | 0.00893518   | -0.00893 | 0.993829313 | -1.006209001 |
| 4.2537  | 4.27847 | 0.994211 | -0.0247685   | 0.02477  | 1.017317495 | 1.017317495  |
| 5.96815 | 5.92194 | 1.0078   | 0.0462037    | -0.04621 | 0.968477207 | -1.032548823 |
| 1.96556 | 1.98222 | 0.991592 | -0.0166667   | 0.01666  | 1.011614766 | 1.011614766  |
| 2.73963 | 2.72056 | 1.00701  | 0.0190741    | -0.01907 | 0.986868662 | -1.013306065 |
| 5.25519 | 5.30819 | 0.990014 | -0.0530093   | 0.053    | 1.037419937 | 1.037419937  |
| 1.74185 | 1.73458 | 1.00419  | 0.0072685    | -0.00727 | 0.994973495 | -1.005051898 |
| 5.57185 | 5.53667 | 1.00635  | 0.0351852    | -0.03518 | 0.975909992 | -1.024684661 |
| 4.54037 | 4.59361 | 0.98841  | -0.0532408   | 0.05324  | 1.037592531 | 1.037592531  |
| 8.9337  | 8.91597 | 1.00199  | 0.0177315    | -0.01773 | 0.987785708 | -1.012365326 |
| 6.92037 | 6.94431 | 0.996553 | -0.0239352   | 0.02394  | 1.016732388 | 1.016732388  |
| 2.39926 | 2.39278 | 1.00271  | 0.00648149   | -0.00648 | 0.995518478 | -1.004501696 |
| 8.0937  | 8.11458 | 0.997427 | -0.0208796   | 0.02088  | 1.014578153 | 1.014578153  |
| 3.29556 | 3.29    | 1.00169  | 0.00555556   | -0.00556 | 0.996153518 | -1.003861334 |
| 8.68519 | 8.66875 | 1.0019   | 0.0164353    | -0.01644 | 0.988669341 | -1.011460514 |
| 2.17741 | 2.16944 | 1.00367  | 0.00796296   | -0.00797 | 0.994490848 | -1.005539671 |
| 7.72333 | 7.70833 | 1.00195  | 0.015        | -0.015   | 0.989656656 | -1.010451446 |
| 2.13889 | 2.12861 | 1.00483  | 0.0102778    | -0.01028 | 0.992899774 | -1.007151    |
| 4.94556 | 4.93681 | 1.00177  | 0.00874998   | -0.00875 | 0.993953317 | -1.006083467 |
| 2.59259 | 2.59319 | 0.999768 | -0.000601869 | 0.0006   | 1.000415975 | 1.000415975  |



| NegLOG10(p-v)  | Representative_Pul | UniGene_ID       | Gene_Title                                         | Gene_Symbol  |
|----------------|--------------------|------------------|----------------------------------------------------|--------------|
| 15.09613       | AW014022           | Hs.170953        | Transcribed locus                                  | ---          |
| 12.01713       | NM_000695          | Hs.87539         | aldehyde dehydrogenase 3B2                         | ALDH3B2      |
| 11.31681       | R70320             | Hs.525105        | SLIT and NTRK-like family member 6                 | SLITRK6      |
| 9.68962        | NM_006005          | Hs.518602        | Wolfram syndrome 1                                 | WFS1         |
| 9.65222        | AI680986           | Hs.525105        | SLIT and NTRK-like family member 6                 | SLITRK6      |
| 9.47344        | BC001025           | Hs.194121        | RNA terminal phosphatase 1                         | RCL1         |
| 9.45915        | AL042166           | Hs.655699        | sidekick homolog 1, Src family tyrosine kinase 4A3 | SDK1         |
| 9.05112        | NM_007079          | Hs.43666         | protein tyrosine phosphatase 4A3                   | PTP4A3       |
| 8.70765        | AK023629           | Hs.188825        | CDNA FLJ33709 from clone F11001                    | ---          |
| 8.13955        | AW205632           | Hs.663159        | Transcribed locus                                  | ---          |
| 7.91446        | AK054607           | Hs.602278        | hypothetical protein LOC144481                     | ---          |
| 7.50283        | AU155515           | Hs.433701        | ribosomal protein L37A                             | RPL37A       |
| 7.41301        | NM_004368          | Hs.651923        | calponin 2                                         | CNN2         |
| 7.21966        | AI865555           | Hs.374458        | alkB, alkylation repressor                         | ALKBH2       |
| 7.07952        | AI625235           | Hs.356766        | chromosome 20 open reading frame 199               | C20orf199    |
| 6.72112        | T87542             | Hs.208550        | WD repeat and FYVE domain containing 2             | WDFY2        |
| 6.61327        | BC030130           | Hs.518602        | Wolfram syndrome 1                                 | WFS1         |
| 6.13698        | AI992187           | Hs.505735        | nascent polypeptide-associated protein 3           | NACA3        |
| 5.89172        | AI150000           | Hs.496684        | Lysosomal-associated membrane protein 2            | LAMP2        |
| 5.75456        | AF131799           | Hs.655699        | sidekick homolog 1, Src family tyrosine kinase 4A3 | SDK1         |
| 5.21625        | AA960844           | Hs.186579        | family with sequence similarity 111B               | FAM111B      |
| 5.21077        | AA398901           | Hs.97661         | CDNA clone IMAGE4675                               | ---          |
| 4.78565        | AI130705           | Hs.38516         | family with sequence similarity 89A                | FAM89A       |
| 4.58824        | NM_002053          | Hs.62661         | guanylate binding protein 1                        | GBP1         |
| 4.29488        | AJ224167           | Hs.268939        | matrin 3, small nuclear GTP-binding protein 3      | MATR3        |
| 4.26326        | BC002666           | Hs.62661         | guanylate binding protein 1                        | GBP1         |
| 4.15853        | AW014593           | Hs.62661         | guanylate binding protein 1                        | GBP1         |
| 4.00733        | AA514326           | Hs.334684        | vacuolar protein sorting 26B                       | VPS26B       |
| 3.89647        | AL049223           | Hs.482587        | secretory carrier membrane protein 1               | SCAMP1       |
| 3.77139        | NM_002252          | Hs.414489        | potassium voltage-gated channel subunit 3          | KCNK3        |
| 3.49626        | NM_016545          | Hs.15725         | immediate early response 5                         | IER5         |
| 3.44913        | AF140507           | Hs.297343        | calcium/calmodulin-dependent kinase 2              | CAMKK2       |
| 3.43580        | NM_001613          | Hs.500483        | actin, alpha 2, smooth muscle                      | ACTA2        |
| 3.40983        | AY029208           | Hs.420269        | collagen, type VI, alpha 1                         | COL6A2       |
| 3.34359        | AI740541           | Hs.30054         | coagulation factor V                               | F5           |
| 3.28364        | AA833830           | Hs.120591        | coiled-coil domain containing 4                    | CCDC4        |
| 3.20700        | NM_017872          | Hs.353090        | tRNA-histidine                                     | THG1L        |
| 3.10699        | AI983201           | Hs.290154        | zinc finger protein 2                              | ZNF276       |
| 3.04028        | NM_002425          | Hs.2258          | matrix metalloproteinase 10                        | MMP10        |
| 2.99785        | AA081084           | Hs.699296        | WW domain containing 1                             | WWTR1        |
| 2.94429        | BC004233           | Hs.27935         | tweety homolog 2 (ITTYH2)                          | ---          |
| 2.90777        | NM_006729          | Hs.696382        | diaphanous homolog 2                               | DIAPH2       |
| 2.87159        | NM_030801          | Hs.571729        | melanoma antigen 1                                 | MAGED4       |
| 2.65335        | AI479082           | Hs.369201        | hypothetical LOC65                                 | FLJ41484     |
| 2.63337        | AA417078           | Hs.662069        | CDNA FLJ26188 from clone F11001                    | ---          |
| <b>2.57834</b> | <b>AI356774</b>    | <b>Hs.518055</b> | <b>leucine-rich repeats</b>                        | <b>LRIG1</b> |
| 2.55464        | BF438330           | Hs.12798         | CDNA clone IMAGE4675                               | ---          |
| 2.54862        | AA296351           | Hs.117835        | FYVE, RhoGEF and FGD4 domain containing 4          | FGD4         |
| 2.33751        | AI281932           | Hs.556090        | Full-length cDNA clone                             | ---          |
| 2.31735        | AW450929           | Hs.656277        | heterogeneous nuclear ribonucleoprotein A1         | HNRNPA1      |

|                   |           |                                              |
|-------------------|-----------|----------------------------------------------|
| 2.26084 AI343459  | Hs.437705 | cell division cycle 2; CDC25A                |
| 2.19419 U67280    | Hs.702061 | calumenin CALU                               |
| 2.19182 NM_024631 | Hs.146079 | chromosome 11 open reading frame 61          |
| 2.18087 AW014345  | Hs.661286 | Transcribed locus ---                        |
| 2.16554 BG546884  | Hs.699247 | cysteine rich transmembrane protein 1        |
| 2.06692 NM_022126 | Hs.527748 | phospholysine phosphatase LHP                |
| 2.01595 NM_000053 | Hs.492280 | ATPase, Cu <sup>++</sup> translocating ATP7B |
| 1.97335 NM_001461 | Hs.642706 | flavin containing monooxygenase FMO5         |
| 1.96364 AW007080  | Hs.150725 | interleukin 17 receptor IL17RD               |
| 1.88928 AI939548  | Hs.476270 | Ras association (Ras) domain containing 1    |
| 1.88616 AI807887  | Hs.632282 | CDNA FLJ34775 from human chromosome 11       |
| 1.85709 AA522618  | Hs.647189 | ribosomal protein L16 hCG_200459             |
| 1.82809 AW979182  | Hs.554251 | Transcribed locus ---                        |
| 1.80662 AU144598  | Hs.655684 | contactin associated protein 2 CNTNAP2       |
| 1.77250 AI721164  | Hs.22026  | transmembrane protein 4 like 1 TM4SF18       |
| 1.72942 AI984980  | Hs.699804 | chemokine (C-C motif) receptor 8 CCL8        |
| 1.71415 BF109773  | Hs.199685 | Transcribed locus ---                        |
| 1.68369 AF258545  | Hs.499620 | gem (nuclear organelle) protein GEMIN4       |
| 1.61499 NM_004486 | Hs.155827 | golgi autoantigen, glycosylated GOLGA2       |
| 1.60589 AI194016  | Hs.223837 | Transcribed locus ---                        |
| 1.53727 NM_016441 | Hs.699247 | cysteine rich transmembrane protein 1        |
| 1.50817 AB048286  | Hs.334305 | diacylglycerol O-acyltransferase 2 DGAT2     |
| 1.50451 NM_006169 | Hs.503911 | nicotinamide N-methyltransferase NNMT        |
| 1.47174 AL119897  | Hs.258209 | RAB3A interacting protein 3 RAB3IP           |
| 1.44644 NM_000111 | Hs.1650   | solute carrier family 26 member 3 SLC26A3    |
| 1.42060 BC018086  | Hs.156506 | CDKN2A interacting protein 1 CDKN2AIPNL      |
| 1.30767 BG413368  | Hs.287555 | coiled-coil domain containing 15 CCDC15      |
| 1.30144 AI090874  | Hs.59889  | 3-hydroxy-3-methylglutaryl-CoA synthase 2    |
| 1.29954 BF507344  | Hs.535041 | Transcribed locus ---                        |
| 1.29593 AI857698  | Hs.321273 | exocyst complex component 4 EXOC4            |
| 1.29225 AF257659  | Hs.702061 | calumenin CALU                               |
| 1.24046 NM_003543 | Hs.591790 | histone cluster 1, H1 HIST1H4H               |
| 1.23280 BF224439  | ---       | ---                                          |
| 1.18299 AI202642  | Hs.512211 | Full-length cDNA clone of human histone H1   |
| 1.14748 U09716    | Hs.465295 | lectin, mannan-binding LMAN1                 |
| 1.13483 AW243081  | Hs.699247 | Cysteine rich transmembrane protein 1        |
| 1.09880 BU632652  | ---       | ---                                          |
| 1.08241 BE222450  | ---       | ---                                          |
| 1.07941 AI768445  | ---       | ---                                          |
| 1.05346 T82147    | Hs.624171 | Transcribed locus ---                        |
| 0.99135 NM_001789 | Hs.437705 | cell division cycle 2; CDC25A                |
| 0.96020 NM_145004 | Hs.521545 | ADAM metalloproteinase 32 ADAM32             |
| 0.95553 AA031404  | Hs.349208 | zinc finger protein 61 ZNF618                |
| 0.91577 NM_001554 | Hs.8867   | cysteine-rich, angiogenic inducer 61 CYR61   |
| 0.90229 AI339785  | Hs.657067 | La ribonucleoprotein 2 LARP2                 |
| 0.88671 NM_002930 | Hs.464985 | Ras-like GTPase domain containing 2          |
| 0.88565 NM_001902 | Hs.19904  | cystathionase (cystathionase) CTH            |
| 0.88452 AL049369  | Hs.282326 | regulator of calcineurin 1 RCAN1             |
| 0.87796 AW972855  | Hs.575983 | Transcribed locus ---                        |
| 0.87358 AI369389  | Hs.410817 | Ribosomal protein L13 RPL13                  |
| 0.86689 AF003114  | Hs.8867   | cysteine-rich, angiogenic inducer 61 CYR61   |
| 0.79313 AC004522  | Hs.568109 | similar to alpha-2-glycoprotein 1 LOC646282  |

|                          |                  |                            |               |
|--------------------------|------------------|----------------------------|---------------|
| 0.78944 N79662           | Hs.485557        | glutathione S-transf       | GSTA4         |
| 0.78841 AK024696         | Hs.487341        | guanine nucleotide         | GNA12         |
| 0.78124 AI990816         | Hs.270364        | laminin, alpha 1           | LAMA1         |
| 0.76931 NM_016215        | Hs.91481         | EGF-like-domain, r         | EGFL7         |
| 0.76566 AA129774         | Hs.447011        | hypothetical gene s        | FLJ13137      |
| 0.74017 AI857788         | Hs.594755        | Transcribed locus          | ---           |
| 0.72331 AW972850         | Hs.448753        | small nucleolar RN/        | SNHG10        |
| 0.71220 AW514038         | Hs.524431        | olfactory receptor, f      | OR7E47P       |
| 0.68925 NM_025263        | Hs.118354        | proline rich 3             | PRR3          |
| 0.68921 H19488           | Hs.194081        | Transcribed locus          | ---           |
| 0.67569 AI567554         | Hs.502461        | diacylglycerol kinas       | DGKZ          |
| 0.66937 AA093668         | ---              | hCG1806964                 | hCG_180696    |
| 0.65422 AK023744         | Hs.654639        | epidermal growth fa        | EPS15L1       |
| 0.61605 AA977481         | Hs.595349        | Transcribed locus          | ---           |
| 0.53859 BF972355         | Hs.533499        | ring finger and CCC        | RC3H2         |
| 0.52727 AA810268         | Hs.514681        | mitogen-activated p        | MAP2K4        |
| 0.51769 NM_020479        | Hs.654438        | ankyrin 1, erythrocy       | ANK1          |
| 0.50385 AC002045         | Hs.694739        | nuclear pore compl         | LOC339047     |
| 0.48656 AI499833         | ---              | hypothetical protein       | LOC157740     |
| 0.47753 AV723459         | Hs.479677        | SLAIN motif family,        | SLAIN2        |
| 0.47192 AL049646         | Hs.472221        | zinc finger protein 1      | ZNF133        |
| 0.44381 H95280           | Hs.593807        | Full-length cDNA cl        | ---           |
| 0.44381 NM_020847        | Hs.655057        | trinucleotide repeat       | TNRC6A        |
| 0.42996 BC000055         | Hs.269512        | follistatin-like 1         | FSTL1         |
| 0.42605 T94585           | ---              | ---                        | ---           |
| <b>0.40832 NM_005794</b> | <b>Hs.272499</b> | <b>dehydrogenase/red</b>   | <b>DHRS2</b>  |
| 0.38456 NM_018378        | ---              | F-box and leucine-r        | FBXL8         |
| 0.37018 AB033026         | Hs.594236        | pleckstrin homology        | PLEKHH1       |
| 0.35618 AI686131         | Hs.93235         | Chromosome 6 ope           | C6orf125      |
| <b>0.35537 AU158529</b>  | <b>Hs.529006</b> | <b>Niemann-Pick dise</b>   | <b>NPC1</b>   |
| <b>0.35438 AI675173</b>  | <b>Hs.199248</b> | <b>prostaglandin E rec</b> | <b>PTGER4</b> |
| 0.32906 NM_005738        | Hs.245540        | ADP-ribosylation fa        | ARL4A         |
| 0.32577 AL832681         | Hs.684023        | MRNA; cDNA DKF             | ---           |
| 0.31642 AA100793         | Hs.207631        | LIM domain 7               | LMO7          |
| 0.30854 AI289774         | ---              | ---                        | ---           |
| 0.30195 AI218580         | Hs.256022        | RAR-related orphar         | RORC          |
| <b>0.30038 NM_020205</b> | <b>Hs.98322</b>  | <b>OTU domain contai</b>   | <b>OTUD7B</b> |
| <b>0.30027 NM_015472</b> | <b>Hs.699296</b> | <b>WW domain contair</b>   | <b>WWTR1</b>  |
| 0.28856 AW469523         | Hs.334305        | diacylglycerol O-acy       | DGAT2         |
| 0.26068 BC032355         | Hs.288772        | tetratricopeptide re       | TTC12         |
| 0.25828 AW888223         | Hs.515687        | matrix-remodelling         | :LOC727882    |
| 0.24112 AB018261         | Hs.567255        | diacylglycerol kinas       | DGKB          |
| 0.23590 AB033026         | Hs.594236        | pleckstrin homology        | PLEKHH1       |
| 0.22863 AB046842         | Hs.259599        | KIAA1622                   | KIAA1622      |
| 0.22699 NM_024060        | Hs.502756        | AHNAK nucleoprote          | AHNAK         |
| 0.22311 AL569506         | Hs.150556        | hypothetical protein       | FLJ43663      |
| 0.22308 NM_022086        | Hs.210469        | engulfment and cell        | ELMO2         |
| 0.21893 AU144005         | Hs.656287        | CDNA FLJ11397 fi           | ---           |
| 0.21272 AB023161         | Hs.97403         | dynein, axonemal, f        | DNAH7         |
| 0.20506 AF052146         | Hs.155085        | CDNA FLJ43660 fi           | ---           |
| 0.19194 AK024370         | Hs.529006        | Niemann-Pick dise          | NPC1          |
| 0.17705 BF196876         | Hs.480694        | ankyrin repeat dom         | ANKRD50       |

|                         |                  |                                                              |
|-------------------------|------------------|--------------------------------------------------------------|
| 0.17695 AC005378        | Hs.655684        | contactin associated protein 2 (CNTNAP2)                     |
| 0.16778 BE748802        | Hs.368226        | SRY (sex determining region Y) protein SOX6                  |
| 0.11034 BE671491        | Hs.258209        | RAB3A interacting protein 1 (RAB3IP)                         |
| 0.10985 AI288202        | Hs.182255        | NHP2 non-histone chromatin protein NHP2L1                    |
| 0.10871 NM_014552       | Hs.418493        | grainyhead-like 1 (GRHL1)                                    |
| 0.10278 NM_004901       | Hs.444389        | cytosolic 5'-nucleoside triphosphate 3'-transferase (ENTPD4) |
| 0.09918 AI732206        | ---              | ---                                                          |
| 0.09872 BC021222        | Hs.696431        | cyclin M2 (CNNM2)                                            |
| 0.08521 NM_002975       | Hs.512680        | C-type lectin domain family 11A (CLEC11A)                    |
| 0.07944 AI436813        | Hs.258209        | RAB3A interacting protein 1 (RAB3IP)                         |
| 0.06970 AK027246        | Hs.287749        | sterol-C5-desaturase (SC5DL)                                 |
| 0.06354 AW967747        | Hs.159188        | CDNA clone IMAGE159188                                       |
| 0.06350 NM_006079       | Hs.82071         | Cbp/p300-interacting protein 2 (CITED2)                      |
| 0.05324 AI078279        | Hs.632419        | family with sequence similarity 73A (FAM73A)                 |
| 0.04797 AI571166        | Hs.657764        | CDNA FLJ39306 from clone FLJ39306                            |
| <b>0.04379 BC042816</b> | <b>Hs.324978</b> | <b>Full length insert cDNA</b>                               |
| 0.03960 AW150923        | Hs.518346        | signal sequence repeat domain 3 (SSR3)                       |
| 0.03932 AA535975        | Hs.515046        | solute carrier family 39A3 (SLC39A3)                         |
| 0.03764 NM_016021       | Hs.163776        | ubiquitin-conjugating enzyme E2J1 (UBE2J1)                   |
| 0.03506 AW194689        | Hs.657858        | Transcribed locus                                            |
| 0.03087 AF109161        | Hs.82071         | Cbp/p300-interacting protein 2 (CITED2)                      |
| 0.02807 AA121544        | Hs.519855        | Chromosome 6 open reading frame 201 (C6orf201)               |
| 0.01980 AF086256        | Hs.660152        | Full length insert cDNA                                      |
| <b>0.00234 M28880</b>   | <b>Hs.654438</b> | <b>ankyrin 1, erythrocyte (ANK1)</b>                         |

| Chromosomal_Loc | Entrez_Gene | SwissProt | RefSeq_Protein_ID        | RefSeq_Transcript  |
|-----------------|-------------|-----------|--------------------------|--------------------|
| ---             | ---         | ---       | ---                      | ---                |
| chr11q13        | 222         | P48448    | /// Q53Y98 NP_000686.2   | /// NFNM_000695    |
| chr13q31.1      | 84189       | A8K9S8    | /// Q9H5Y7 NP_115605.2   | NM_032229          |
| chr4p16         | 7466        | O76024    | NP_005996.1              | NM_006005          |
| chr13q31.1      | 84189       | A8K9S8    | /// Q9H5Y7 NP_115605.2   | NM_032229          |
| chr9p24.1-p23   | 10171       | Q5VYW8    | /// Q5VZL NP_005763.3    | NM_005772          |
| chr7p22.2       | 221935      | A8MRT8    | /// Q7Z5N NP_001073121.1 | /// NFNM_001079653 |
| chr8q24.3       | 11156       | O75365    | /// Q6ZRAE NP_009010.2   | /// NFNM_007079    |
| ---             | ---         | ---       | ---                      | ---                |
| ---             | ---         | ---       | ---                      | ---                |
| chr12q22        | 144481      | ---       | XP_001128090.1           | /// XM_001128090   |
| chr2q35         | 6168        | P61513    | /// Q6FGF5 NP_000989.1   | NM_000998          |
| chr19p13.3      | 1265        | A5D8U8    | /// Q53GK NP_004359.1    | /// NFNM_004368    |
| chr12q24.11     | 121642      | A4PET2    | /// Q6NS3 NP_001001655.1 | NM_001001655       |
| chr20q13.13     | 441951      | Q5QHF1    | /// Q8N5E XP_934843.1    | /// XPNR_003604    |
| chr13q14.3      | 115825      | Q5W0C0    | /// Q96LK NP_443182.1    | NM_052950          |
| chr4p16         | 7466        | O76024    | NP_005996.1              | NM_006005          |
| chr12q23-q24.1  | 389240      | A6NNW5    | /// A8MT NP_001106672.1  | /// NFNM_001113201 |
| chrXq24         | 3920        | A8K4X5    | /// P13473 NP_002285.1   | /// NFNM_002294    |
| chr7p22.2       | 221935      | A8MRT8    | /// Q7Z5N NP_001073121.1 | /// NFNM_001079653 |
| chr11q12.1      | 374393      | Q6SJ93    | NP_945185.1              | NM_198947          |
| ---             | ---         | ---       | ---                      | ---                |
| chr1q42.2       | 375061      | Q96GI7    | NP_940954.1              | /// XFNM_198552    |
| chr1p22.2       | 2633        | P32455    | /// Q59H47 NP_002044.1   | NM_002053          |
| chr5q31.2       | 724102      | A8MXP9    | /// P43243 NP_061322.2   | /// NFNM_018834    |
| chr1p22.2       | 2633        | P32455    | /// Q59H47 NP_002044.1   | NM_002053          |
| chr1p22.2       | 2633        | P32455    | /// Q59H47 NP_002044.1   | NM_002053          |
| chr11q25        | 112936      | Q4G0F5    | NP_443107.1              | NM_052875          |
| chr5q13.3-q14.1 | 9522        | A8K2G0    | /// O15126 NP_004857.4   | /// NFNM_004866    |
| chr2p24         | 3790        | Q4ZFY1    | /// Q9BQ3 NP_002243.3    | NM_002252          |
| chr1q25.3       | 51278       | Q32P56    | /// Q5VY0 NP_057629.2    | NM_016545          |
| chr12q24.2      | 10645       | A8K7Q7    | /// Q8IZW1 NP_006540.3   | /// NFNM_006549    |
| chr10q23.3      | 59          | P62736    | /// Q13707 NP_001604.1   | NM_001613          |
| chr21q22.3      | 1292        | P12110    | /// Q6FHW NP_001840.3    | /// NFNM_001849    |
| chr1q23         | 2153        | A8K6E8    | /// P12259 NP_000121.2   | NM_000130          |
| chr4p13         | 389206      | A1A5D6    | /// A1A5D7 NP_997289.2   | /// XFNM_207406    |
| chr5q33.3       | 54974       | Q9H8R6    | /// Q9NW NP_060342.2     | NM_017872          |
| chr16q24.3      | 92822       | A8K186    | /// Q3KR18 NP_689500.2   | NM_152287          |
| chr11q22.3      | 4319        | P09238    | /// Q53HH9 NP_002416.1   | NM_002425          |
| chr3q23-q24     | 25937       | Q6ZS93    | /// Q9GZV NP_056287.1    | NM_015472          |
| chr17q25.1      | 94015       | Q8N3U8    | /// Q9BSA NP_116035.5    | /// NFNM_032646    |
| chrXq22         | 1730        | A6NG19    | /// A6NML NP_006720.1    | /// NFNM_006729    |
| chrXp11.22      | 728239      | A8K093    | /// Q5HYN NP_001092270.1 | /// NFNM_001098800 |
| chr13q34        | 650669      | Q6ZW81    | NP_001034888.1           | NM_001039799       |
| ---             | ---         | ---       | ---                      | ---                |
| chr3p14         | 26018       | Q5XWD3    | /// Q96JA NP_056356.2    | NM_015541          |
| ---             | ---         | ---       | ---                      | ---                |
| chr12p11.21     | 121512      | Q49A55    | /// Q96M9 NP_640334.1    | NM_139241          |
| ---             | ---         | ---       | ---                      | ---                |
| chr12q13.1      | 3178        | A8K4Z8    | /// P09651 NP_002127.1   | /// NFNM_002136    |

|                           |                          |                                                       |
|---------------------------|--------------------------|-------------------------------------------------------|
| chr3p21                   | 993                      | A8K3D9 /// P30304 NP_001780.2 /// NFNM_001789 /// NM_ |
| chr7q32                   | 813                      | O43852 /// Q6IAW5 NP_001210.1 NM_001219               |
| chr11q24.2                | 79684                    | Q6P1R3 NP_078907.1 NM_024631                          |
| ---                       | ---                      | ---                                                   |
| chr2p21                   | 51232                    | Q4ZG85 /// Q53TH NP_057525.1 NM_016441                |
| chr10q26.13               | 64077                    | Q5T1Z0 /// Q9H008 NP_071409.2 NM_022126               |
| chr13q14.3                | 540                      | P35670 /// Q17RT3 NP_000044.2 /// NFNM_000053 /// NM_ |
| chr1q21.1                 | 2330                     | P49326 /// Q53H53 NP_001452.1 NM_001461               |
| chr3p14.3                 | 54756                    | Q8NFM7 NP_001074442.1 // NM_001080973 /// I           |
| chr3p21.3                 | 11186                    | A8K9C3 /// Q0VGC NP_009113.3 /// NFNM_007182 /// NM_  |
| ---                       | ---                      | Q8NAU4 --- ---                                        |
| chr10q22.1 /// chr10q22.1 | 442232 /// 6139 /// 6137 | A8MSU5 /// A8MU0 NP_000976.1 /// NFNM_000985 /// NM_  |
| ---                       | ---                      | ---                                                   |
| chr7q35-q36               | 26047                    | O75852 /// Q75LG9 NP_054860.1 NM_014141               |
| chr3q25.1                 | 116441                   | Q96CE8 NP_620141.1 NM_138786                          |
| chr17q11.2                | 6355                     | P80075 NP_005614.2 NM_005623                          |
| ---                       | ---                      | ---                                                   |
| chr17p13                  | 50628                    | P57678 /// Q8WUM NP_056536.2 NM_015721                |
| chr9q34.11                | 2801                     | Q08379 /// Q5HYE NP_004477.2 NM_004486                |
| ---                       | ---                      | ---                                                   |
| chr2p21                   | 51232                    | Q4ZG85 /// Q53TH NP_057525.1 NM_016441                |
| chr11q13.5                | 84649                    | A6ND76 /// Q96PD NP_115953.2 NM_032564                |
| chr11q23.1                | 4837                     | P40261 /// Q6FH49 NP_006160.1 NM_006169               |
| chr12q14.3                | 117177                   | Q68K28 /// Q96QF NP_001019818.1 // NM_001024647 /// I |
| chr7q31                   | 1811                     | P40879 /// Q6MZW NP_000102.1 NM_000111                |
| chr5q31.1                 | 91368                    | Q8WVE3 /// Q96HC NP_542387.1 NM_080656                |
| chr11q24.2                | 80071                    | Q0P6D6 NP_079280.2 NM_025004                          |
| chr1p13-p12               | 3158                     | P54868 /// Q5SZU2 NP_005509.1 NM_005518               |
| ---                       | ---                      | ---                                                   |
| chr7q31                   | 60412                    | Q541U8 /// Q6NX5 NP_001032203.1 // NM_001037126 /// I |
| chr7q32                   | 813                      | O43852 /// Q6IAW5 NP_001210.1 NM_001219               |
| chr6p21.3                 | 8365                     | A2VCL0 /// P62805 NP_003534.1 NM_003543               |
| ---                       | ---                      | ---                                                   |
| ---                       | ---                      | ---                                                   |
| chr18q21.3-q22            | 3998                     | A0PJ85 /// P49257 NP_005561.1 NM_005570               |
| chr2p21                   | 51232                    | Q9NZV1 NP_057525.1 NM_016441                          |
| ---                       | ---                      | ---                                                   |
| ---                       | ---                      | ---                                                   |
| ---                       | ---                      | ---                                                   |
| ---                       | ---                      | ---                                                   |
| chr3p21                   | 993                      | A8K3D9 /// P30304 NP_001780.2 /// NFNM_001789 /// NM_ |
| chr8p11.23                | 203102                   | A6NCM2 /// A8MTR NP_659441.3 /// XFNM_145004 /// XM_  |
| chr9q32                   | 114991                   | A1L4R1 /// Q5T7W NP_001035152.1 // NM_001040063 /// I |
| chr1p31-p22               | 3491                     | O00622 /// O95694 NP_001545.2 NM_001554               |
| chr4q28.2                 | 55132                    | Q659C4 NP_060548.2 /// NFNM_018078 /// NM_            |
| chr18q12.3                | 6014                     | Q99578 NP_002921.1 NM_002930                          |
| chr1p31.1                 | 1491                     | P32929 /// Q53FB3 NP_001893.2 /// NFNM_001902 /// NM_ |
| chr21q22.1-q22.2 2        | 1827                     | P53805 /// Q6FGP2 NP_004405.3 /// NFNM_004414 /// NM_ |
| ---                       | ---                      | ---                                                   |
| chr16q24.3 17p11.2        | 6137                     | A8K4C8 /// O60250 NP_000968.2 /// NFNM_000977 /// NM_ |
| chr1p31-p22               | 3491                     | O00622 /// O95694 NP_001545.2 NM_001554               |
| chr7q22.1                 | 646282                   | A8MT79 --- XR_017216                                  |

|                     |                   |                   |                    |                   |
|---------------------|-------------------|-------------------|--------------------|-------------------|
| chr6p12.1           | 2941              | O15217 /// Q6P4G1 | NP_001503.1        | NM_001512         |
| chr7p22.2           | 2768              | A4D204 /// Q03113 | NP_031379.2        | NM_007353         |
| chr18p11.31         | 284217            | A6NN17 /// P25391 | NP_005550.2 /// XF | NM_005559 /// XM_ |
| chr9q34.3           | 51162             | Q9UHF1            | NP_057299.1 /// NF | NM_016215 /// NM_ |
| chr1q23.3           | 400793            | A1L170            | NP_001078844.1 //  | NM_001085375 ///  |
| ---                 | ---               | ---               | ---                | ---               |
| chr14q32.13         | 283596            | ---               | ---                | NR_001459 /// NR_ |
| chr12q13.13         | 26628             | ---               | ---                | ---               |
| chr6p21.33          | 80742             | A1A4H4 /// A6NDA  | NP_001070965.1 //  | NM_001077497 ///  |
| ---                 | ---               | ---               | ---                | ---               |
| chr11p11.2          | 8525              | Q13574 /// Q59F26 | NP_001099010.1 //  | NM_001105540 ///  |
| chr3q25.1           | 401093            | ---               | XP_379228.1 /// XP | XM_379228 /// XM_ |
| chr19p13.11         | 58513             | A2RRF3 /// A5PKY  | NP_067058.1        | NM_021235         |
| ---                 | ---               | ---               | ---                | ---               |
| chr9q34             | 54542             | Q9HBD1            | NP_001094058.1 //  | NM_001100588 ///  |
| chr17p11.2          | 6416              | P45985 /// Q6FHX4 | NP_003001.1        | NM_003010         |
| chr8p11.1           | 286               | A0PJN8 /// A6NJ23 | NP_000028.3 /// NF | NM_000037 /// NM_ |
| chr16p13-p11 /// ch | 339047 /// 642799 | A6NMU5 /// O1510  | NP_008916.2 /// XF | NM_006985 /// XM_ |
| chr8p23.1           | 157740            | Q96KT8            | ---                | ---               |
| chr4p12             | 57606             | A8K4P1 /// A8MSR  | NP_065897.1 /// XF | NM_020846 /// XM_ |
| chr20p11.23-p11.2   | 7692              | A8K5S4 /// P52736 | NP_001076799.1 //  | NM_001083330 ///  |
| ---                 | ---               | ---               | ---                | ---               |
| chr16p11.2          | 27327             | Q8NDV7            | NP_055309.2 /// NF | NM_014494 /// NM_ |
| chr3q13.33          | 11167             | A8K523 /// Q12841 | NP_009016.1        | NM_007085         |
| ---                 | ---               | ---               | ---                | ---               |
| chr14q11.2          | 10202             | Q13268 /// Q53GS4 | NP_005785.1 /// NF | NM_005794 /// NM_ |
| chr16q22.1          | 55336             | Q96CD0            | NP_060848.2        | NM_018378         |
| chr14q24.1          | 57475             | Q9ULM0            | NP_065766.1        | NM_020715         |
| chr6p21.31          | 84300             | Q1M2P6 /// Q6ZSG  | NP_115716.1        | NM_032340         |
| chr18q11-q12        | 4864              | Q96DM3            | NP_000262.1        | NM_000271         |
| chr5p13.1           | 5734              | A0PJF5 /// P35408 | NP_000949.1        | NM_000958         |
| chr7p21-p15.3       | 10124             | A4D119 /// P40617 | NP_001032241.1 //  | NM_001037164 ///  |
| ---                 | ---               | ---               | ---                | ---               |
| chr13q22.2          | 4008              | Q5JV86 /// Q5TBKE | NP_005349.3        | NM_005358         |
| ---                 | ---               | ---               | ---                | ---               |
| chr1q21             | 6097              | P51449 /// Q53FZ4 | NP_001001523.1 //  | NM_001001523 ///  |
| chr1q21.2           | 56957             | Q5SZ59 /// Q5SZ6C | NP_064590.2        | NM_020205         |
| chr3q23-q24         | 25937             | Q6ZS93 /// Q9GZV  | NP_056287.1        | NM_015472         |
| chr11q13.5          | 84649             | A6ND76 /// Q96PD  | NP_115953.2        | NM_032564         |
| chr11q23.1          | 54970             | A8K8G6 /// Q53G1  | NP_060338.3        | NM_017868         |
| chr1p36.33          | 54587 /// 727882  | Q9BRK3            | NP_115724.1        | NM_032348 /// XR_ |
| chr7p21.2           | 1607              | A4D116 /// A4D117 | NP_004071.1 /// NF | NM_004080 /// NM_ |
| chr14q24.1          | 57475             | Q9ULM0            | NP_065766.1        | NM_020715         |
| chr14q32.13         | 57718             | Q6NUP7            | NP_066009.2 /// NF | NM_020958 /// NM_ |
| chr11q12.2          | 79026             | A1A586 /// Q09666 | NP_001611.1 /// NF | NM_001620 /// NM_ |
| chr7q32.3           | 378805            | ---               | XP_380146.3 /// XP | XM_380146 /// XM_ |
| chr20q13            | 63916             | Q5BLP5 /// Q5JVZ4 | NP_573403.1 /// NF | NM_133171 /// NM_ |
| ---                 | ---               | ---               | ---                | ---               |
| chr2q32.3           | 56171             | O00433 /// O95492 | NP_061720.2        | NM_018897         |
| ---                 | ---               | Q6ZUJ2            | ---                | ---               |
| chr18q11-q12        | 4864              | Q96DM3            | NP_000262.1        | NM_000271         |
| chr4q28.1           | 57182             | A8K4V3 /// Q8TB46 | NP_065070.1        | NM_020337         |

|                   |        |                   |                    |                    |
|-------------------|--------|-------------------|--------------------|--------------------|
| chr7q35-q36       | 26047  | O75852 /// Q75LG9 | NP_054860.1        | NM_014141          |
| chr11p15.3        | 55553  | P35712            | NP_059978.1 /// NF | NM_017508 /// NM_  |
| chr12q14.3        | 117177 | Q68K28 /// Q96QFC | NP_001019818.1 //  | NM_001024647 /// I |
| chr22q13.2-q13.31 | 4809   | P55769 /// Q6FHMε | NP_001003796.1 //  | NM_001003796 /// I |
| chr2p25.1         | 29841  | A6NLA4 /// Q9NZI5 | NP_055367.2 /// NF | NM_014552 /// NM_  |
| chr8p21.3         | 9583   | Q8NE73 /// Q9Y227 | NP_004892.1        | NM_004901          |
| ---               | ---    | ---               | ---                | ---                |
| chr10q24.32       | 54805  | Q9H8M5            | NP_060119.3 /// NF | NM_017649 /// NM_  |
| chr19q13.3        | 6320   | A0AUH1 /// Q5U0B  | NP_002966.1        | NM_002975          |
| chr12q14.3        | 117177 | Q68K28 /// Q96QFC | NP_001019818.1 //  | NM_001024647 /// I |
| chr11q23.3        | 6309   | O75845 /// Q6GTM  | NP_001020127.1 //  | NM_001024956 /// I |
| ---               | ---    | Q7Z4Q0            | ---                | ---                |
| chr6q23.3         | 10370  | Q99967            | NP_006070.2        | NM_006079          |
| chr1p31.1         | 374986 | Q8NAN2            | NP_940951.1        | NM_198549          |
| ---               | ---    | ---               | ---                | ---                |
| ---               | ---    | ---               | ---                | ---                |
| chr3q25.31        | 6747   | Q9UNL2            | NP_009038.1        | NM_007107          |
| chr19p13.3        | 29985  | Q9BRY0 /// Q9BVY  | NP_653165.2 /// NF | NM_144564 /// NM_  |
| chr6q15           | 51465  | A8K3F9 /// Q53F25 | NP_057105.2        | NM_016021          |
| ---               | ---    | ---               | ---                | ---                |
| chr6q23.3         | 10370  | Q99967            | NP_006070.2        | NM_006079          |
| chr6p25.2         | 404220 | Q7Z4U5 /// Q8WTU  | NP_001078870.1 //  | NM_001085401 /// I |
| ---               | ---    | ---               | ---                | ---                |
| chr8p11.1         | 286    | A0PJN8 /// A6NJ23 | NP_000028.3 /// NF | NM_000037 /// NM_  |



| Gene_Ontology_Bi     | Gene_Ontology_Ce       | Gene_Ontology_Mr     | Pathway                                   |
|----------------------|------------------------|----------------------|-------------------------------------------|
| ---                  | ---                    | ---                  | ---                                       |
| 0006066 // alcohol r | ---                    | 0004028 // 3-chloro  | ---                                       |
| ---                  | 0016020 // membra      | 0005515 // protein t | ---                                       |
| 0006091 // generati  | 0005624 // membra      | ---                  | ---                                       |
| ---                  | 0016020 // membra      | 0005515 // protein t | ---                                       |
| ---                  | 0005634 // nucleus     | 0003824 // catalytic | ---                                       |
| 0007155 // cell adh  | 0016020 // membra      | 0005515 // protein t | ---                                       |
| 0006470 // protein ε | 0005768 // endosom     | 0004721 // phospho   | ---                                       |
| ---                  | ---                    | ---                  | ---                                       |
| ---                  | ---                    | ---                  | ---                                       |
| ---                  | ---                    | ---                  | ---                                       |
| 0006412 // translati | 0005622 // intracell   | 0003735 // structur  | ---                                       |
| 0007010 // cytoskel  | 0005856 // cytoskel    | 0003779 // actin bin | Smooth_muscle_contraction // GenMAPP      |
| 0006281 // DNA re    | 0005634 // nucleus     | 0003684 // damage    | ---                                       |
| ---                  | ---                    | ---                  | ---                                       |
| ---                  | ---                    | 0008270 // zinc ion  | ---                                       |
| 0006091 // generati  | 0005624 // membra      | ---                  | ---                                       |
| 0006350 // transcrip | 0005634 // nucleus     | 0003677 // DNA bin   | DNA_replication_Reactome // GenMAPP // G  |
| 0005977 // glycoger  | 0005624 // membra      | ---                  | ---                                       |
| 0007155 // cell adh  | 0016020 // membra      | 0005515 // protein t | ---                                       |
| ---                  | ---                    | 0003824 // catalytic | ---                                       |
| ---                  | ---                    | ---                  | ---                                       |
| ---                  | ---                    | ---                  | ---                                       |
| 0006955 // immune    | 0005886 // plasma      | 0000166 // nucleoti  | ---                                       |
| ---                  | 0005622 // intracell   | 0000166 // nucleoti  | ---                                       |
| 0006955 // immune    | 0005886 // plasma      | 0000166 // nucleoti  | ---                                       |
| 0006955 // immune    | 0005886 // plasma      | 0000166 // nucleoti  | ---                                       |
| 0006810 // transpor  | 0005737 // cytoplas    | 0005515 // protein t | ---                                       |
| 0006810 // transpor  | 0005624 // membra      | ---                  | ---                                       |
| 0006810 // transpor  | 0005624 // membra      | 0005216 // ion chan  | ---                                       |
| ---                  | ---                    | ---                  | ---                                       |
| 0000165 // MAPKKI    | 0005622 // intracell   | 0000166 // nucleoti  | ---                                       |
| ---                  | 0005737 // cytoplas    | 0000166 // nucleoti  | Smooth_muscle_contraction // GenMAPP // S |
| 0006817 // phosph    | 0005576 // extracell   | 0005198 // structur  | ---                                       |
| 0007155 // cell adh  | 0005576 // extracell   | 0005507 // copper i  | Blood_Clotting_Cascade // GenMAPP // Bloo |
| ---                  | ---                    | ---                  | ---                                       |
| 0006400 // tRNA m    | 0005737 // cytoplas    | 0008193 // tRNA gu   | ---                                       |
| 0006350 // transcrip | 0005622 // intracell   | 0003676 // nucleic   | ---                                       |
| 0006508 // proteoly  | 0005576 // extracell   | 0003824 // catalytic | Matrix_Metalloproteinases // GenMAPP      |
| 0000122 // negative  | 0005634 // nucleus     | 0003713 // transcrip | ---                                       |
| 0006810 // transpor  | 0005886 // plasma      | 0005216 // ion chan  | ---                                       |
| 0000910 // cytokine  | 0005737 // cytoplas    | 0003779 // actin bin | DNA_replication_Reactome // GenMAPP       |
| ---                  | ---                    | ---                  | ---                                       |
| ---                  | ---                    | ---                  | ---                                       |
| ---                  | ---                    | ---                  | ---                                       |
| ---                  | ---                    | ---                  | ---                                       |
| ---                  | 0016020 // membra      | 0005515 // protein t | ---                                       |
| ---                  | ---                    | ---                  | ---                                       |
| 0007010 // cytoskel  | 0001726 // ruffle // i | 0003779 // actin bin | ---                                       |
| ---                  | ---                    | ---                  | ---                                       |
| 0000398 // nuclear   | 0005634 // nucleus     | 0000166 // nucleoti  | ---                                       |

0000079 // regulati 0005622 // intracell 0004721 // phospho Cell\_cycle\_KEGG // GenMAPP /// G1\_to\_S\_c  
 --- 0005576 // extracell 0005509 // calcium ---  
 --- --- --- ---  
 --- --- --- ---  
 0001558 // regulatic 0005576 // extracell 0004197 // cysteine ---  
 0008152 // metabol --- 0003824 // catalytic ---  
 0006810 // transpor 0005737 // cytoplas 0000166 // nucleoti ---  
 0006118 // electron 0005783 // endopla: 0004497 // monoox ---  
 --- 0000139 // Golgi m 0004872 // receptor ---  
 0007049 // cell cycl 0005634 // nucleus 0005515 // protein t ---  
 --- --- --- Electron\_Transport\_Chain // GenMAPP  
 0006412 // translati 0005622 // intracell 0003723 // RNA bin Ribosomal\_Proteins // GenMAPP  
 --- --- --- ---  
 0007155 // cell adhe 0016020 // membra 0005102 // receptor ---  
 --- 0016020 // membra --- ---  
 0006816 // calcium 0005576 // extracell 0004871 // signal tr: ---  
 --- --- --- ---  
 0006364 // rRNA pr 0005634 // nucleus 0005515 // protein t ---  
 --- 0005794 // Golgi ap 0005515 // protein t ---  
 --- --- --- ---  
 0001558 // regulatic 0005576 // extracell 0004197 // cysteine ---  
 0006071 // glycerol 0005624 // membra 0004144 // diacylgly ---  
 --- 0005737 // cytoplas 0008112 // nicotinar ---  
 0006810 // transpor 0005634 // nucleus 0005085 // guanyl-r ---  
 0006810 // transpor 0005624 // membra 0003700 // transcrip ---  
 --- --- --- ---  
 --- --- --- ---  
 0006694 // steroid t 0005739 // mitochoi 0003824 // catalytic Synthesis\_and\_Degradation\_of\_Keton\_Bodie  
 --- --- --- ---  
 0006810 // transpor 0000145 // exocyst 0003676 // nucleic ε ---  
 --- 0005576 // extracell 0005509 // calcium ---  
 0006325 // establist 0000786 // nucleosc 0003677 // DNA bin ---  
 --- --- --- ---  
 --- --- --- ---  
 0006457 // protein f 0000139 // Golgi m 0005515 // protein t ---  
 0001558 // regulatic 0005576 // extracell 0004197 // cysteine ---  
 --- --- --- ---  
 --- --- --- ---  
 --- --- --- ---  
 --- --- --- ---  
 0000079 // regulatic 0005622 // intracell 0004721 // phospho Cell\_cycle\_KEGG // GenMAPP /// G1\_to\_S\_c  
 0006508 // proteoly: 0016020 // membra 0004222 // metalloe ---  
 0006350 // transcrip 0005622 // intracell 0003676 // nucleic ε ---  
 0001558 // regulatic 0005576 // extracell 0005515 // protein t Hypertrophy\_model // GenMAPP /// Hypertrop  
 --- --- 0003723 // RNA bin ---  
 0007165 // signal tr: 0005622 // intracell 0000166 // nucleoti ---  
 0006520 // amino a 0005737 // cytoplas 0003824 // catalytic ---  
 0007165 // signal tr: 0005634 // nucleus 0003677 // DNA bin ---  
 --- --- --- ---  
 0006412 // translati 0005622 // intracell 0003723 // RNA bin Ribosomal\_Proteins // GenMAPP  
 0001558 // regulatic 0005576 // extracell 0005515 // protein t Hypertrophy\_model // GenMAPP /// Hypertrop  
 0006955 // immune 0016020 // membra --- ---

0006950 // respons 0005737 // cytopla 0004364 // glutathic ---  
0007165 // signal tr: 0016020 // membra 0000166 // nucleoti G\_Protein\_Signaling // GenMAPP /// G\_Prote  
0007155 // cell adh 0005576 // extracell 0005102 // receptor ---  
0001525 // angioge 0005576 // extracell 0005509 // calcium ---  
--- --- --- ---  
--- --- --- ---  
--- --- --- ---  
--- --- --- ---  
--- --- 0003676 // nucleic ε ---  
--- --- --- ---  
0007165 // signal tr: 0005634 // nucleus 0004143 // diacylgly Smooth\_muscle\_contraction // GenMAPP /// ε  
--- --- --- ---  
0006897 // endocyt 0005634 // nucleus 0004872 // receptor ---  
--- --- --- ---  
--- 0005624 // membra 0003676 // nucleic ε ---  
0006468 // protein ε --- 0000166 // nucleoti Apoptosis // GenMAPP /// Apoptosis\_GenMAI  
0006887 // exocyto: 0005737 // cytoplas 0005198 // structur ---  
0006810 // transpor 0005634 // nucleus --- ---  
--- --- --- ---  
--- --- --- ---  
0006350 // transcrip 0005622 // intracell 0003676 // nucleic ε ---  
--- --- --- ---  
--- 0005737 // cytoplas 0000166 // nucleoti ---  
--- 0005576 // extracell 0005509 // calcium ---  
--- --- --- ---  
0006118 // electron 0005634 // nucleus 0003824 // catalytic ---  
0006512 // ubiquitin --- --- ---  
--- 0005856 // cytoskel 0005488 // binding / ---  
--- --- --- ---  
0006897 // endocyt 0005635 // nuclear 0008158 // hedgehc ---  
0006955 // immune 0005886 // plasma 0001584 // rhodops GPCRDB\_Class\_A\_Rhodopsin-like // GenMA  
0007264 // small G 0005622 // intracell 0000166 // nucleoti ---  
--- --- --- ---  
0016567 // protein 0000151 // ubiquitin 0003779 // actin bin ---  
--- --- --- ---  
0006350 // transcrip 0005634 // nucleus 0003677 // DNA bin Nuclear\_Receptors // GenMAPP  
0006512 // ubiquitin 0005634 // nucleus 0003677 // DNA bin ---  
0000122 // negative 0005634 // nucleus 0003713 // transcrip ---  
0006071 // glycerol 0005624 // membra 0004144 // diacylgly ---  
--- --- 0005488 // binding / ---  
--- 0016020 // membra --- ---  
0007205 // protein k 0005737 // cytoplas 0004143 // diacylgly ---  
--- 0005856 // cytoskel 0005488 // binding / ---  
--- --- 0005488 // binding / ---  
0007399 // nervous 0005634 // nucleus 0003676 // nucleic ε ---  
--- --- --- ---  
0006909 // phagocy 0005737 // cytoplas 0005488 // binding / ---  
--- --- --- ---  
0001539 // ciliary or 0005858 // axonem: 0000166 // nucleoti ---  
--- --- --- ---  
0006897 // endocyt 0005635 // nuclear 0008158 // hedgehc ---  
--- --- --- ---

0007155 // cell adh 0016020 // membr 0005102 // receptor ---  
0006325 // establisl 0005634 // nucleus 0003677 // DNA bin ---  
0006810 // transpor 0005634 // nucleus 0005085 // guanyl-r ---  
0006397 // mRNA p 0005634 // nucleus 0003723 // RNA bin ---  
0006350 // transcrip 0005634 // nucleus 0003677 // DNA bin ---  
0006256 // UDP cat 0005764 // lysosom 0000287 // magnes ---  
--- --- --- ---  
0006810 // transpor 0016020 // membra --- ---  
0008284 // positive 0005576 // extracell 0005529 // sugar bi ---  
0006810 // transpor 0005634 // nucleus 0005085 // guanyl-r ---  
0006629 // lipid met 0005783 // endopla: 0000248 // C-5 ster Cholesterol\_Biosynthesis // GenMAPP  
--- --- --- ---  
0006350 // transcrip 0005634 // nucleus 0003700 // transcrip ---  
--- 0016020 // membra --- ---  
--- --- --- ---  
--- --- --- ---  
0006613 // cotransl: 0005783 // endopla: 0005048 // signal se ---  
0006810 // transpor 0016020 // membra 0008270 // zinc ion ---  
0006512 // ubiquitin 0005783 // endopla: 0004842 // ubiquitin ---  
--- --- --- ---  
0006350 // transcrip 0005634 // nucleus 0003700 // transcrip ---  
0006464 // protein r --- 0004190 // aspartic ---  
--- --- --- ---  
0006887 // exocyto: 0005737 // cytoplas 0005198 // structur: ---

31\_to\_S\_cell\_cycle\_Reactome // GenMAPP

Smooth\_muscle\_contraction // GenMAPP /// Smooth\_muscle\_contraction // GenMAPP /// Striated\_musc  
le\_Contraction // GenMAPP /// Blood\_Clotting\_Cascade // GenMAPP /// Blood\_Clotting\_Cascade

:ell\_cycle\_Reactome // GenMAPP

:s\_KEGG // GenMAPP

:ell\_cycle\_Reactome // GenMAPP

:hy\_model // GenMAPP /// Hypertrophy\_model // GenMAPF

:hy\_model // GenMAPP /// Hypertrophy\_model // GenMAPF

in\_Signaling // GenMAPP

Smooth\_muscle\_contraction // GenMAPP /// Smooth\_muscle\_contraction // GenMAPP

PP // GenMAPP /// MAPK\_Cascade // GenMAPP

.PP /// Prostaglandin\_synthesis\_regulation // GenMAPP /// Small\_ligand\_GPCRs // GenMAPP





le\_contraction // GenMAPP /// Striated\_muscle\_contraction // GenMAPP /// Striated\_muscle\_contractior  
// GenMAPF







n // GenMAPP
