# Supplementary material
Source: PubMed Central journal article supplement (PMC3077061)
Supplement: NIHMS265571-supplement-13.pdf [file NIHMS265571-supplement-13.pdf]

**Significant Probe sets (p<0.05 vs. Normal) Unique in each condition Overlaps a**

| GP3       | GP4       | GP5                | Met                                                                                                                                                                                                                                                                                                                                                                                                                                                                                                                                                                                                                                                                                                                                                                                                                                                                                                                                                                                                                                                                                                                                                                                                                                                                                                                                                                                                                                                                                                                                                                                                                                                                                                                                                                                                                                                                                                                                                                                                                                                                                                                                                                                                                                                                                                                                                                                                                                                                                                                                                                                                                                                                                   | GP3 | GP4 | GP5 | Met | GP3-4 |
|-----------|-----------|--------------------|---------------------------------------------------------------------------------------------------------------------------------------------------------------------------------------------------------------------------------------------------------------------------------------------------------------------------------------------------------------------------------------------------------------------------------------------------------------------------------------------------------------------------------------------------------------------------------------------------------------------------------------------------------------------------------------------------------------------------------------------------------------------------------------------------------------------------------------------------------------------------------------------------------------------------------------------------------------------------------------------------------------------------------------------------------------------------------------------------------------------------------------------------------------------------------------------------------------------------------------------------------------------------------------------------------------------------------------------------------------------------------------------------------------------------------------------------------------------------------------------------------------------------------------------------------------------------------------------------------------------------------------------------------------------------------------------------------------------------------------------------------------------------------------------------------------------------------------------------------------------------------------------------------------------------------------------------------------------------------------------------------------------------------------------------------------------------------------------------------------------------------------------------------------------------------------------------------------------------------------------------------------------------------------------------------------------------------------------------------------------------------------------------------------------------------------------------------------------------------------------------------------------------------------------------------------------------------------------------------------------------------------------------------------------------------------|-----|-----|-----|-----|-------|
| 229912_at | 232176_at | 222666_s_230577_at | 1552266_a_1561542_a_1563469_a_202134_s_1564907_s_229899_s_230577_at_230577_at_202908_at_208782_at_209156_s_202238_s_205020_s_200756_x_233063_s_202908_at_201605_x_201289_at_213778_x_216960_s_205131_x_206143_at_202552_s_230577_at_235976_at_232176_at_232176_at_214291_at_227010_at_214038_at_207980_s_203294_s_232176_at_204942_s_222018_at_226671_at_217099_s_227048_at_218523_at_209357_at_204624_at_238156_at_233063_s_235976_at_210764_s_219122_s_227997_at_222412_s_214222_at_204695_at_206574_s_229912_at_212425_at_235976_at_220080_at_235526_at_225731_at_214870_x_218611_at_229407_at_206574_s_226448_at_1555270_a_225726_s_235974_at_226064_s_221737_at_221919_at_204942_s_230306_at_1555270_a_226448_at_225727_at_238339_x_231926_at_222304_x_223741_s_235976_at_231577_s_205968_at_219301_s_227019_at_239045_at_228702_at_226592_at_205776_at_1555270_a_233063_s_200974_at_228496_s_at_241360_at_233230_s_228603_at_218611_at_221261_x_231926_at_212425_at_229590_at_244786_at_235173_at_229407_at_238526_at_222018_at_238156_at_231029_at_231011_at_238228_at_230896_at_202908_at_202270_at_205680_at_1559315_s_238573_at_239342_at_238127_at_222018_at_202269_x_219301_s_222304_x_at_243063_at_238526_at_225625_at_226671_at_235360_at_233063_s_at_244116_at_222666_s_222666_s_202908_at_231468_at_230896_at_223741_s_221261_x_205968_at_202270_at_213459_at_208181_at_204942_s_at_201605_x_218611_at_233002_at_202270_at_202269_x_1557129_a_229899_s_239615_at_231577_s_226448_at_230334_at_224327_s_at_213459_at_230334_at_227490_at_221737_at_224327_s_200974_at_239045_at_242722_at_210787_s_238526_at_238619_at_242445_at_230306_at_210787_s_225625_at_222666_s_at_221919_at_238156_at_204942_s_202269_x_at_1564907_s_1564907_s_206574_s_217013_at_226671_at_1559315_s_200974_at_239342_at_1555270_a_221919_at_241360_at_239242_at_227490_at_201605_x_238920_at_202132_at_214291_at_235974_at_225731_at_1557129_a_at_201289_at_205680_at_231029_at_201605_x_at_229590_at_202551_s_202238_s_202134_s_at_204624_at_229407_at_242722_at_238156_at_1559315_s_238127_at_217013_at_235173_at_230334_at_202132_at_1557129_a_240110_at_230762_at_225625_at_239615_at_228702_at_202551_s_244116_at_1563469_a_202551_s_at_1557129_a_229899_s_235405_at_233002_at_217099_s_229370_at_1559315_s_238228_at_210764_s_242445_at_229912_at_231577_s_at_223741_s_227490_at_213459_at_230334_at_212425_at_227010_at_218523_at_238920_at_213778_x_209156_s_244786_at_235405_at_202552_s_227997_at_226064_s_209357_at_1552266_a_202552_s_230762_at_229370_at_205968_at_238339_x_232345_at_230762_at_227019_at_231029_at_214038_at_203265_s_at_225727_at_203294_s_210787_s_213459_at |     |     |     |     |       |

200756\_x 230631\_s\_239242\_at 229912\_at  
204695\_at 240110\_at 231468\_at 208181\_at  
225726\_s\_200756\_x\_222412\_s\_230631\_s\_at  
228496\_s\_1561542\_e\_203265\_s\_204384\_at  
200974\_at 204695\_at 205131\_x\_205020\_s\_at  
231029\_at 230896\_at 240110\_at 1554348\_s\_at  
238573\_at 235526\_at 207980\_s\_at  
226592\_at 205968\_at 205776\_at  
203294\_s\_216960\_s\_at 214222\_at  
238619\_at 228603\_at 233230\_s\_at  
220080\_at 204624\_at 230306\_at  
242445\_at 204384\_at 214870\_x\_at  
231011\_at 224327\_s\_at 225625\_at  
202132\_at 227048\_at 243063\_at  
219122\_s\_230762\_at 235360\_at  
238127\_at 239242\_at 232345\_at  
208782\_at 1554348\_s\_at 206143\_at  
244116\_at 210764\_s\_at  
228603\_at 226592\_at  
235405\_at  
203265\_s\_at

**among different conditions**

| GP3-5     | GP4-5     | Gp3-Met   | GP4-Met   | GP5-Met   | GP3-4-5   | GP3-4-Met   | GP3-5-Met | GP4-5-Met |
|-----------|-----------|-----------|-----------|-----------|-----------|-------------|-----------|-----------|
| 238619_at | 205680_at | 201289_at | 1554348_s | 208181_at | 206574_s  | 202132_at   | 212425_at | 203265_s  |
| .at       | 221261_x  | 205776_at | 204384_at | 217013_at | 210787_s  | 202269_x_at |           | 226448_at |
| .at       |           |           | 229370_at | 219301_s  | 222018_at | 202270_at   |           | 235405_at |
| .at       |           |           | 230631_s  | 231468_at | 227490_at | 202551_s_at |           | 239242_at |
|           |           |           |           | 232345_at | 229899_s  | 210764_s_at |           | 240110_at |
|           |           |           |           | 233002_at |           | 224327_s_at |           |           |
|           |           |           |           | 235360_at |           | 226671_at   |           |           |
|           |           |           |           | 238920_at |           | 230306_at   |           |           |
| .at       |           |           |           | 239615_at |           | 231577_s_at |           |           |
|           |           |           |           | 242722_at |           | 242445_at   |           |           |



GP3-4-5-Met  
1555270\_a\_at  
1557129\_a\_at  
1559315\_s\_at  
200974\_at  
201605\_x\_at  
202908\_at  
204942\_s\_at  
205968\_at  
213459\_at  
222666\_s\_at  
225625\_at  
229912\_at  
230334\_at  
230577\_at  
230762\_at  
231029\_at  
232176\_at  
233063\_s\_at  
235976\_at  
238156\_at
