# Supplementary material
Source: PubMed Central journal article supplement (PMC3077061)
Supplement: NIHMS265571-supplement-14.pdf [file NIHMS265571-supplement-14.pdf]

## Heemers – Supplemental Table 6

**A**

| probe set ID | gene symbol       | under/overexpression | study         |
|--------------|-------------------|----------------------|---------------|
| 1555270_a_at | WFS1              | -                    | a,b,c,d,e     |
| 1557129_a_at | FAM111B           | +                    | NM            |
| 1559315_s_at | LOC144481         | -                    | NM            |
| 200974_at    | ACTA2             | -                    | a,c,d,e,f,g,h |
| 201605_x_at  | CNN2              | -                    | a,f,h,i       |
| 202908_at    | WFS1              | -                    | a,b,c,d,e     |
| 204942_s_at  | ALDH3B2           | +                    | a,j           |
| 205968_at    | KCNS3             | +                    | f,k,j         |
| 213459_at    | RPL37A            | +                    | c             |
| 222666_s_at  | RCL1              | +                    | a,f,l         |
| 225625_at    | ALKBH2            | +                    | a             |
| 229912_at    | SDK1              | +                    | a,i,j,l       |
| 230334_at    | IMAGE:40078968    | +                    | NM            |
| 230577_at    | Transcribed locus | -                    | NM            |
| 230762_at    | CS0DD009YA07      | -                    | NM            |
| 231029_at    | F5                | +                    | a             |
| 232176_at    | SLITRK6           | -                    | i             |
| 233063_s_at  | FLJ33709          | +                    | NM            |
| 235976_at    | SLITRK6           | -                    | i             |
| 238156_at    | Transcribed locus | +                    | NM            |

**B**

| study | reference              | platform             | array type | # samples | # genes |
|-------|------------------------|----------------------|------------|-----------|---------|
| a     | Vanaja et al.          | U133A, U113B         | oligo      | 40        | 17,358  |
| b     | Dhanasekaran et al.    | custom-made array    | cDNA       | 101       | 6,371   |
| c     | Yu et al.              | U95A-Av2             | oligo      | 112       | 7,820   |
| d     | Liu et al.             | U133A                | oligo      | 57        | 12,427  |
| e     | Welsh et al.           | U95A-Av2             | oligo      | 34        | 7,820   |
| f     | Lapointe et al.        | custom-made array    | cDNA       | 112       | 10,021  |
| g     | Holzbeierlein et al.   | U95A-Av2             | oligo      | 54        | 7,820   |
| h     | Luo et al.             | Hu35KsubA-D,U95A-Av2 | oligo      | 30        | 14,054  |
| i     | Dhanasekaran et al.(2) | custom-made array    | cDNA       | 43        | 10,447  |
| j     | Varambally et al.      | U133 Plus 2.0        | oligo      | 19        | 19,079  |
| k     | Singh et al.           | U95A-Av2             | oligo      | 102       | 7,820   |
| l     | Tomlins et al.         | custom-made array    | cDNA       | 101       | 10,442  |
