# Supplementary material
Source: PubMed Central journal article supplement (PMC3077061)
Supplement: NIHMS265571-supplement-15.pdf [file NIHMS265571-supplement-15.pdf]

| ID        | logFC    | AveExpr  | t         | P.Value  | adj.P.Val | B         |
|-----------|----------|----------|-----------|----------|-----------|-----------|
| 230896_at | 1.53875  | 8.765625 | 5.987725  | 0.000191 | 0.015495  | 1.14826   |
| 229912_at | 2.565    | 3.8625   | 5.901658  | 0.000213 | 0.015495  | 1.050965  |
| 229407_at | 2.12875  | 3.756875 | 5.581675  | 0.00032  | 0.015495  | 0.678572  |
| 229899_s_ | 1.6525   | 5.03125  | 5.517089  | 0.000348 | 0.015495  | 0.601345  |
| 230577_at | -3.58875 | 7.288125 | -5.151069 | 0.000568 | 0.020214  | 0.150399  |
| 232176_at | -2.52625 | 3.929375 | -4.845119 | 0.000867 | 0.0206    | -0.243982 |
| 204942_s_ | 3.1375   | 5.705    | 4.827119  | 0.000889 | 0.0206    | -0.26768  |
| 226671_at | -0.94625 | 8.585625 | -4.738697 | 0.001008 | 0.0206    | -0.384884 |
| 221261_x_ | -3.63375 | 6.099375 | -4.645389 | 0.001152 | 0.0206    | -0.509989 |
| 204695_at | 0.52125  | 4.068125 | 4.641987  | 0.001157 | 0.0206    | -0.514578 |
| 230306_at | 0.9125   | 6.5075   | 4.44458   | 0.001541 | 0.024934  | -0.78414  |
| 225625_at | 0.90375  | 5.093125 | 4.24975   | 0.002055 | 0.030484  | -1.056405 |
| 206574_s_ | 1.8775   | 3.5325   | 4.174721  | 0.002299 | 0.031485  | -1.162855 |
| 222666_s_ | 0.96875  | 2.603125 | 4.053605  | 0.002761 | 0.035107  | -1.336515 |
| 235976_at | -2.135   | 3.8675   | -3.973556 | 0.00312  | 0.036989  | -1.452493 |
| 221919_at | 0.57625  | 5.108125 | 3.932042  | 0.003325 | 0.036989  | -1.513004 |
| 233063_s_ | 1.1025   | 4.10125  | 3.88052   | 0.003599 | 0.037686  | -1.588443 |
| 222018_at | 0.74     | 7.35125  | 3.79211   | 0.004127 | 0.040508  | -1.718745 |
| 222315_at | 0.445    | 3.83875  | 3.762237  | 0.004324 | 0.040508  | -1.76301  |
| 238853_at | 1.0875   | 5.625    | 3.533921  | 0.006191 | 0.055104  | -2.104984 |
| 218611_at | -1.15375 | 5.329375 | -3.459721 | 0.006967 | 0.059053  | -2.217406 |
| 244116_at | 1.7375   | 6.2175   | 3.396174  | 0.007712 | 0.062394  | -2.314133 |
| 210787_s_ | 1.57125  | 3.544375 | 3.341773  | 0.008415 | 0.064752  | -2.397243 |
| 1557129_a | 0.93     | 2.3425   | 3.29665   | 0.009049 | 0.064752  | -2.466374 |
| 238156_at | 0.59625  | 7.790625 | 3.293538  | 0.009094 | 0.064752  | -2.471148 |
| 205776_at | 2.385    | 4.11875  | 3.196773  | 0.010634 | 0.071999  | -2.619966 |
| 235974_at | 0.34375  | 2.664375 | 3.120008  | 0.012047 | 0.071999  | -2.738478 |
| 238526_at | 0.38625  | 7.235625 | 3.118032  | 0.012086 | 0.071999  | -2.741533 |
| 201605_x_ | -0.615   | 5.1      | -3.114529 | 0.012155 | 0.071999  | -2.746949 |
| 231577_s_ | -1.8675  | 7.57875  | -3.089176 | 0.012667 | 0.071999  | -2.786172 |
| 202269_x_ | -1.99375 | 7.273125 | -3.078037 | 0.0129   | 0.071999  | -2.803415 |
| 202270_at | -1.945   | 7.19125  | -3.075949 | 0.012944 | 0.071999  | -2.806648 |
| 1559315_s | -0.87625 | 4.611875 | -2.962756 | 0.015576 | 0.084016  | -2.982174 |
| 205968_at | 0.76     | 5.83     | 2.916512  | 0.016804 | 0.087974  | -3.053999 |
| 213459_at | 0.59     | 7.065    | 2.889761  | 0.017559 | 0.088045  | -3.095567 |
| 223741_s_ | -0.9175  | 5.445    | -2.881237 | 0.017807 | 0.088045  | -3.108813 |
| 201289_at | -0.69    | 10.10625 | -2.789351 | 0.020715 | 0.097038  | -3.251637 |
| 202908_at | -0.7125  | 6.335    | -2.789334 | 0.020716 | 0.097038  | -3.251664 |
| 200974_at | -1.12875 | 12.06437 | -2.751332 | 0.022056 | 0.100665  | -3.310719 |
| 205680_at | 1.03     | 2.78     | 2.596367  | 0.028492 | 0.126787  | -3.551129 |
| 235526_at | -0.47    | 4.84125  | -2.567899 | 0.029865 | 0.129134  | -3.595173 |
| 231399_at | 0.66625  | 5.039375 | 2.548473  | 0.03084  | 0.129134  | -3.625197 |
| 227010_at | 0.3      | 1.95625  | 2.541545  | 0.031195 | 0.129134  | -3.635898 |
| 224327_s_ | -0.45    | 2.695    | -2.525714 | 0.032023 | 0.129547  | -3.66034  |
| 226448_at | -0.45    | 2.435    | -2.421847 | 0.038022 | 0.147163  | -3.820167 |
| 1564907_s | 0.57375  | 3.321875 | 2.421711  | 0.038031 | 0.147163  | -3.820377 |
| 230631_s_ | -0.4125  | 2.89     | -2.377444 | 0.040916 | 0.152888  | -3.888159 |
| 229443_at | 0.34125  | 2.545625 | 2.37284   | 0.041228 | 0.152888  | -3.895195 |
| 231011_at | 0.39625  | 2.714375 | 2.306546  | 0.045993 | 0.165194  | -3.99621  |
| 209156_s_ | -1.34375 | 6.261875 | -2.292553 | 0.047066 | 0.165194  | -4.017455 |
| 243063_at | 0.80375  | 3.834375 | 2.288188  | 0.047406 | 0.165194  | -4.024075 |

|           |          |          |           |          |          |           |
|-----------|----------|----------|-----------|----------|----------|-----------|
| 227490_at | -0.34375 | 3.374375 | -2.277357 | 0.048259 | 0.165194 | -4.040491 |
| 238127_at | 0.74375  | 3.554375 | 2.240283  | 0.051295 | 0.170775 | -4.09654  |
| 230334_at | 0.3625   | 3.37375  | 2.231204  | 0.052067 | 0.170775 | -4.110233 |
| 200756_x  | 0.38     | 4.13875  | 2.223068  | 0.052768 | 0.170775 | -4.122489 |
| 214038_at | 0.33875  | 2.601875 | 2.187814  | 0.055913 | 0.175681 | -4.175465 |
| 202132_at | -0.785   | 7.4275   | -2.184066 | 0.056257 | 0.175681 | -4.181084 |
| 213778_x  | 0.33875  | 3.071875 | 2.156882  | 0.058822 | 0.178495 | -4.221757 |
| 229590_at | 0.61375  | 7.894375 | 2.153337  | 0.059164 | 0.178495 | -4.227049 |
| 203294_s  | 0.23     | 2.30375  | 2.088728  | 0.065757 | 0.195078 | -4.323063 |
| 228603_at | -0.7575  | 5.69     | -2.07099  | 0.067687 | 0.197513 | -4.349263 |
| 226592_at | 0.64875  | 3.743125 | 2.024238  | 0.073039 | 0.209692 | -4.417961 |
| 214291_at | 0.48375  | 4.444375 | 1.941146  | 0.08356  | 0.236091 | -4.538678 |
| 209357_at | 0.615    | 7.87125  | 1.929342  | 0.085167 | 0.23687  | -4.555673 |
| 1555270_e | -0.44625 | 3.130625 | -1.904767 | 0.088605 | 0.242642 | -4.590922 |
| 1561542_e | 0.9975   | 4.04     | 1.878114  | 0.092482 | 0.249421 | -4.628947 |
| 227997_at | -0.8875  | 6.07125  | -1.8461   | 0.097348 | 0.255093 | -4.674323 |
| 244786_at | 0.52     | 4.65375  | 1.845439  | 0.097451 | 0.255093 | -4.675257 |
| 230762_at | -0.5675  | 3.75     | -1.825495 | 0.100606 | 0.259534 | -4.703353 |
| 1554348_s | 0.29375  | 2.033125 | 1.735834  | 0.115993 | 0.294954 | -4.82795  |
| 231926_at | 0.29875  | 2.166875 | 1.717442  | 0.119406 | 0.299355 | -4.853142 |
| 241837_at | 0.50875  | 5.526875 | 1.662545  | 0.130145 | 0.313355 | -4.927544 |
| 230443_at | -0.2525  | 2.435    | -1.662036 | 0.130249 | 0.313355 | -4.928229 |
| 242445_at | -0.215   | 1.8375   | -1.661926 | 0.130271 | 0.313355 | -4.928376 |
| 233002_at | -0.2025  | 1.69125  | -1.643656 | 0.134038 | 0.318118 | -4.952859 |
| 216960_s  | -0.2125  | 6.975    | -1.616763 | 0.139763 | 0.32734  | -4.98864  |
| 219122_s  | 0.43125  | 5.836875 | 1.577221  | 0.14858  | 0.340564 | -5.040674 |
| 202238_s  | 0.45625  | 4.161875 | 1.562389  | 0.152013 | 0.340564 | -5.060008 |
| 239615_at | -0.365   | 2.92875  | -1.561453 | 0.152232 | 0.340564 | -5.061225 |
| 202551_s  | -0.41    | 7.81875  | -1.557913 | 0.153063 | 0.340564 | -5.065822 |
| 241360_at | 0.27875  | 3.023125 | 1.516918  | 0.162981 | 0.358156 | -5.118639 |
| 204077_x  | -0.3     | 4.3275   | -1.495521 | 0.16838  | 0.365507 | -5.145881 |
| 233230_s  | -0.315   | 2.1075   | -1.482579 | 0.171721 | 0.368085 | -5.162249 |
| 207980_s  | 0.745    | 5.0075   | 1.475004  | 0.173703 | 0.368085 | -5.171789 |
| 206143_at | 1.31375  | 4.389375 | 1.463599  | 0.176726 | 0.370084 | -5.1861   |
| 227048_at | 0.41875  | 1.730625 | 1.453497  | 0.179441 | 0.3714   | -5.198718 |
| 220363_s  | 0.19     | 2.02125  | 1.440103  | 0.183096 | 0.374611 | -5.215366 |
| 228496_s  | -0.255   | 9.0175   | -1.3797   | 0.200393 | 0.40534  | -5.289252 |
| 208181_at | 0.16625  | 1.981875 | 1.371759  | 0.202768 | 0.405535 | -5.298817 |
| 222304_x  | 0.57125  | 6.240625 | 1.356591  | 0.20737  | 0.409927 | -5.316986 |
| 210764_s  | -0.64875 | 6.328125 | -1.349444 | 0.209569 | 0.409927 | -5.325502 |
| 242739_at | 0.25     | 2.23375  | 1.327048  | 0.216589 | 0.415925 | -5.351996 |
| 238339_x  | 0.14625  | 1.936875 | 1.318712  | 0.219252 | 0.415925 | -5.361783 |
| 235125_x  | 0.17     | 9.165    | 1.309502  | 0.222226 | 0.415925 | -5.372547 |
| 217099_s  | 0.56125  | 4.478125 | 1.308347  | 0.222602 | 0.415925 | -5.373894 |
| 204624_at | 0.46625  | 4.778125 | 1.289827  | 0.228693 | 0.415925 | -5.395373 |
| 235173_at | -0.335   | 5.40875  | -1.28284  | 0.231027 | 0.415925 | -5.403422 |
| 221208_s  | -0.30125 | 6.510625 | -1.279401 | 0.232183 | 0.415925 | -5.407374 |
| 204384_at | 0.4075   | 6.625    | 1.27608   | 0.233304 | 0.415925 | -5.411183 |
| 228489_at | 0.495    | 2.62875  | 1.27501   | 0.233666 | 0.415925 | -5.412408 |
| 212425_at | -0.28375 | 3.640625 | -1.251634 | 0.241692 | 0.425953 | -5.439008 |
| 239242_at | 0.19625  | 2.413125 | 1.222784  | 0.25191  | 0.439608 | -5.471364 |
| 243724_at | -0.18375 | 4.383125 | -1.168516 | 0.272083 | 0.466973 | -5.530767 |

|           |          |          |           |          |          |           |
|-----------|----------|----------|-----------|----------|----------|-----------|
| 214845_s_ | 0.36625  | 4.264375 | 1.166547  | 0.272838 | 0.466973 | -5.532885 |
| 229677_at | 0.12125  | 3.270625 | 1.106053  | 0.296879 | 0.50328  | -5.596685 |
| 221737_at | 0.17     | 6.79875  | 1.096785  | 0.300705 | 0.504957 | -5.606235 |
| 1563469_e | 0.27125  | 3.018125 | 1.086575  | 0.304964 | 0.507323 | -5.616685 |
| 239642_at | 0.18125  | 2.108125 | 1.071174  | 0.311477 | 0.51336  | -5.632307 |
| 1561595_x | 0.10625  | 2.385625 | 1.019309  | 0.334198 | 0.545754 | -5.683641 |
| 214222_at | -0.3275  | 3.56     | -1.003699 | 0.341276 | 0.552247 | -5.698701 |
| 214870_x_ | 0.15625  | 9.580625 | 0.983814  | 0.350455 | 0.56199  | -5.717617 |
| 231029_at | 0.78     | 2.86     | 0.967375  | 0.35818  | 0.564806 | -5.733025 |
| 215253_s_ | 0.1225   | 2.11375  | 0.966579  | 0.358557 | 0.564806 | -5.733765 |
| 1554522_e | 0.1575   | 2.08375  | 0.95796   | 0.36266  | 0.566259 | -5.741755 |
| 202552_s_ | -0.17875 | 8.080625 | -0.936528 | 0.373012 | 0.577358 | -5.761369 |
| 241652_x_ | 0.24875  | 2.064375 | 0.912559  | 0.384841 | 0.586326 | -5.782875 |
| 228806_at | -0.39625 | 7.089375 | -0.911452 | 0.385394 | 0.586326 | -5.783857 |
| 213422_s_ | -0.2575  | 4.7      | -0.891418 | 0.395495 | 0.596595 | -5.80146  |
| 240110_at | -0.45625 | 3.470625 | -0.872004 | 0.405462 | 0.606489 | -5.818207 |
| 227126_at | -0.3175  | 2.735    | -0.857743 | 0.412894 | 0.611788 | -5.830311 |
| 208782_at | -0.17875 | 11.73687 | -0.852066 | 0.415878 | 0.611788 | -5.835082 |
| 235360_at | -0.22625 | 5.419375 | -0.83123  | 0.42696  | 0.622942 | -5.852365 |
| 232348_at | -0.08375 | 1.959375 | -0.819125 | 0.43349  | 0.627327 | -5.862236 |
| 1560071_e | 0.1675   | 2.02375  | 0.799399  | 0.444275 | 0.632649 | -5.878057 |
| 220016_at | -0.16375 | 2.889375 | -0.799396 | 0.444276 | 0.632649 | -5.878059 |
| 225727_at | 0.17625  | 7.359375 | 0.773415  | 0.458752 | 0.643077 | -5.898387 |
| 242722_at | 0.175    | 7.93     | 0.773286  | 0.458825 | 0.643077 | -5.898486 |
| 204696_s_ | 0.085    | 1.9725   | 0.742685  | 0.476269 | 0.662312 | -5.921672 |
| 238920_at | 0.1675   | 2.92625  | 0.733522  | 0.481574 | 0.664497 | -5.928453 |
| 205020_s_ | 0.24     | 7.4625   | 0.700233  | 0.501162 | 0.686207 | -5.952463 |
| 220080_at | 0.10375  | 1.866875 | 0.690829  | 0.506784 | 0.686848 | -5.959065 |
| 1553346_e | 0.08875  | 1.535625 | 0.686563  | 0.509348 | 0.686848 | -5.962034 |
| 206984_s_ | 0.11125  | 1.581875 | 0.661364  | 0.524649 | 0.702162 | -5.979231 |
| 206085_s_ | 0.0825   | 1.7225   | 0.653351  | 0.529572 | 0.703462 | -5.984578 |
| 229370_at | 0.135    | 3.4125   | 0.639362  | 0.538232 | 0.709669 | -5.99377  |
| 240278_at | 0.0875   | 2.0325   | 0.614762  | 0.55366  | 0.723866 | -6.009493 |
| 228702_at | -0.16375 | 7.326875 | -0.609281 | 0.557133 | 0.723866 | -6.01292  |
| 1552685_e | 0.0625   | 1.72125  | 0.586226  | 0.571872 | 0.737631 | -6.027023 |
| 218523_at | 0.06125  | 3.070625 | 0.570905  | 0.581785 | 0.74502  | -6.036116 |
| 208352_x_ | 0.095    | 2.67875  | 0.545455  | 0.598458 | 0.756099 | -6.050726 |
| 205391_x_ | -0.1275  | 2.6575   | -0.544736 | 0.598933 | 0.756099 | -6.05113  |
| 205726_at | 0.13875  | 7.960625 | 0.508894  | 0.622846 | 0.780751 | -6.070622 |
| 1552266_e | 0.07     | 2.45     | 0.497321  | 0.630671 | 0.785031 | -6.076649 |
| 230133_at | -0.0575  | 2.2675   | -0.469083 | 0.649965 | 0.803428 | -6.090804 |
| 215064_at | -0.04625 | 1.741875 | -0.45733  | 0.658078 | 0.804792 | -6.096463 |
| 219301_s_ | 0.12125  | 9.809375 | 0.450159  | 0.663051 | 0.804792 | -6.099849 |
| 1554531_e | 0.095    | 2.34125  | 0.447885  | 0.664632 | 0.804792 | -6.100912 |
| 215145_s_ | 0.16375  | 4.276875 | 0.43793   | 0.671573 | 0.807703 | -6.105505 |
| 202134_s_ | 0.06375  | 2.383125 | 0.418581  | 0.685157 | 0.816846 | -6.114148 |
| 205131_x_ | -0.0775  | 2.67125  | -0.414054 | 0.688353 | 0.816846 | -6.116117 |
| 217013_at | 0.05375  | 2.970625 | 0.387377  | 0.707316 | 0.832881 | -6.127296 |
| 204896_s_ | 0.04125  | 1.593125 | 0.381917  | 0.711224 | 0.832881 | -6.129496 |
| 232345_at | -0.04125 | 2.134375 | -0.3718   | 0.718489 | 0.83589  | -6.133491 |
| 225731_at | 0.0625   | 8.35875  | 0.361977  | 0.725572 | 0.836827 | -6.137271 |
| 214947_at | -0.06625 | 1.845625 | -0.357654 | 0.728697 | 0.836827 | -6.138904 |

|           |          |          |           |          |          |           |
|-----------|----------|----------|-----------|----------|----------|-----------|
| 239045_at | -0.0575  | 2.155    | -0.342534 | 0.739671 | 0.843984 | -6.144463 |
| 238228_at | -0.08125 | 6.075625 | -0.33376  | 0.746067 | 0.84586  | -6.147582 |
| 217826_s_ | 0.075    | 8.8925   | 0.325133  | 0.752377 | 0.847615 | -6.150572 |
| 1556678_e | 0.065    | 5.05125  | 0.302917  | 0.768714 | 0.853072 | -6.157919 |
| 239342_at | 0.035    | 1.7475   | 0.301177  | 0.769998 | 0.853072 | -6.158473 |
| 231468_at | -0.13125 | 3.251875 | -0.29901  | 0.771599 | 0.853072 | -6.159158 |
| 218825_at | 0.065    | 3.4775   | 0.263855  | 0.797727 | 0.876514 | -6.169599 |
| 227019_at | -0.05875 | 3.119375 | -0.250845 | 0.807465 | 0.881772 | -6.173138 |
| 239877_at | 0.02375  | 1.731875 | 0.242878  | 0.813446 | 0.882887 | -6.175218 |
| 238573_at | 0.06     | 4.525    | 0.22367   | 0.827918 | 0.893148 | -6.17996  |
| 232797_at | -0.0525  | 2.81375  | -0.194104 | 0.850327 | 0.911796 | -6.186504 |
| 226848_at | -0.06875 | 6.561875 | -0.165385 | 0.87223  | 0.919455 | -6.191981 |
| 236229_at | 0.0475   | 6.8125   | 0.163377  | 0.873766 | 0.919455 | -6.192331 |
| 203265_s_ | -0.0325  | 3.96     | -0.152269 | 0.882273 | 0.919455 | -6.194193 |
| 204795_at | -0.02    | 2.16375  | -0.148965 | 0.884807 | 0.919455 | -6.194722 |
| 222412_s_ | 0.0325   | 8.15375  | 0.147242  | 0.886128 | 0.919455 | -6.194993 |
| 216307_at | -0.0175  | 1.69125  | -0.14179  | 0.890313 | 0.919455 | -6.19583  |
| 220031_at | -0.01375 | 1.760625 | -0.137474 | 0.893628 | 0.919455 | -6.19647  |
| 225726_s_ | -0.0175  | 9.38125  | -0.09747  | 0.924451 | 0.945702 | -6.201466 |
| 235405_at | 0.03625  | 7.540625 | 0.090471  | 0.929859 | 0.945799 | -6.202166 |
| 226064_s_ | -0.015   | 2.75     | -0.051502 | 0.96003  | 0.97055  | -6.20511  |
| 206463_s_ | -0.005   | 2.1675   | -0.043728 | 0.966059 | 0.97055  | -6.205504 |
| 238619_at | 0.0125   | 4.8575   | 0.037938  | 0.97055  | 0.97055  | -6.205756 |
