# Supplementary material
Source: PubMed Central journal article supplement (PMC3077061)
Supplement: NIHMS265571-supplement-16.pdf [file NIHMS265571-supplement-16.pdf]

| ID        | logFC   | AveExpr | t         | P.Value  | adj.P.Val | B         |
|-----------|---------|---------|-----------|----------|-----------|-----------|
| 228702_at | -1.2525 | 7.06625 | -4.978316 | 0.004252 | 0.21965   | -4.276406 |
| 232176_at | -0.9175 | 2.68875 | -4.437279 | 0.006879 | 0.21965   | -4.294103 |
| 216960_s_ | 0.775   | 6.475   | 4.336437  | 0.007557 | 0.21965   | -4.297936 |
| 241837_at | 1.755   | 4.6625  | 4.22939   | 0.008364 | 0.21965   | -4.302216 |
| 238853_at | 1.1075  | 5.30625 | 4.175211  | 0.008809 | 0.21965   | -4.304469 |
| 215145_s_ | -0.81   | 3.775   | -4.060543 | 0.009847 | 0.21965   | -4.30944  |
| 244786_at | 0.69    | 4.66    | 4.056928  | 0.009881 | 0.21965   | -4.309601 |
| 204384_at | 1.185   | 6.92    | 3.967995  | 0.010787 | 0.21965   | -4.313663 |
| 222304_x_ | -1.46   | 4.87    | -3.938739 | 0.011106 | 0.21965   | -4.31504  |
| 1561542_e | -1.2625 | 3.55375 | -3.770714 | 0.01316  | 0.231854  | -4.323345 |
| 214291_at | -0.615  | 4.515   | -3.663733 | 0.014694 | 0.231854  | -4.329011 |
| 201289_at | -1.475  | 9.8625  | -3.60402  | 0.015639 | 0.231854  | -4.33231  |
| 202269_x_ | -2.2775 | 6.73625 | -3.528657 | 0.016933 | 0.231854  | -4.336618 |
| 221208_s_ | 0.665   | 6.3125  | 3.45151   | 0.018385 | 0.233757  | -4.341201 |
| 226848_at | 0.8175  | 6.57875 | 3.318613  | 0.021232 | 0.244922  | -4.349531 |
| 235976_at | -0.895  | 2.595   | -3.281754 | 0.022108 | 0.244922  | -4.351942 |
| 236229_at | 0.945   | 6.195   | 3.230628  | 0.023391 | 0.244922  | -4.355363 |
| 213778_x_ | 0.6675  | 2.92125 | 3.050679  | 0.028626 | 0.256793  | -4.36813  |
| 231468_at | -0.68   | 2.49    | -3.030274 | 0.029298 | 0.256793  | -4.369652 |
| 229590_at | 0.72    | 7.0125  | 3.007362  | 0.030075 | 0.256793  | -4.37138  |
| 205131_x_ | 0.6675  | 2.93875 | 3.000955  | 0.030296 | 0.256793  | -4.371867 |
| 231029_at | -0.71   | 5.765   | -2.943715 | 0.032355 | 0.26178   | -4.376285 |
| 238573_at | -0.67   | 4.1125  | -2.643455 | 0.046061 | 0.353281  | -4.401615 |
| 227010_at | -0.3825 | 2.06125 | -2.541943 | 0.05206  | 0.353281  | -4.411041 |
| 202270_at | -2.18   | 6.615   | -2.541349 | 0.052097 | 0.353281  | -4.411097 |
| 207980_s_ | -1.15   | 3.94    | -2.508788 | 0.054201 | 0.353281  | -4.414217 |
| 202551_s_ | -1.07   | 7.67    | -2.503345 | 0.054561 | 0.353281  | -4.414743 |
| 219301_s_ | -1.8125 | 8.51875 | -2.479389 | 0.056179 | 0.353281  | -4.417075 |
| 209357_at | -0.7475 | 7.25625 | -2.459581 | 0.057557 | 0.353281  | -4.419022 |
| 214870_x_ | 0.435   | 9.7175  | 2.373469  | 0.063988 | 0.378707  | -4.427691 |
| 206574_s_ | -0.5175 | 3.21125 | -2.329189 | 0.067594 | 0.378707  | -4.432278 |
| 204624_at | -0.9025 | 4.19625 | -2.323388 | 0.068082 | 0.378707  | -4.432886 |
| 228496_s_ | -0.795  | 9.0625  | -2.125552 | 0.087228 | 0.446307  | -4.454513 |
| 1564907_s | -0.4325 | 3.19375 | -2.111911 | 0.088744 | 0.446307  | -4.456069 |
| 231577_s_ | -1.28   | 7.1675  | -2.10762  | 0.089227 | 0.446307  | -4.45656  |
| 202134_s_ | -0.635  | 2.31    | -2.082827 | 0.092071 | 0.446307  | -4.459413 |
| 226448_at | -0.4875 | 1.96875 | -2.076845 | 0.092772 | 0.446307  | -4.460105 |
| 238156_at | 0.3775  | 7.86875 | 2.036125  | 0.097691 | 0.457607  | -4.464859 |
| 233063_s_ | 0.7975  | 4.40625 | 1.995498  | 0.102873 | 0.469525  | -4.469673 |
| 220016_at | -0.3375 | 2.67875 | -1.901103 | 0.116051 | 0.493394  | -4.481121 |
| 241652_x_ | 0.4     | 2.0825  | 1.890188  | 0.117684 | 0.493394  | -4.482467 |
| 227126_at | -0.9175 | 2.88625 | -1.87534  | 0.119943 | 0.493394  | -4.484307 |
| 223741_s_ | 0.9075  | 5.79875 | 1.850976  | 0.123747 | 0.493394  | -4.487344 |
| 208352_x_ | -0.335  | 2.5175  | -1.800284 | 0.132064 | 0.493394  | -4.493732 |
| 214947_at | -1.2525 | 2.04125 | -1.792652 | 0.133365 | 0.493394  | -4.494702 |
| 243063_at | 1.075   | 5.06    | 1.787079  | 0.134323 | 0.493394  | -4.495412 |
| 210764_s_ | -1.125  | 5.71    | -1.785823 | 0.13454  | 0.493394  | -4.495572 |
| 240110_at | -0.6125 | 2.69125 | -1.769989 | 0.137305 | 0.493394  | -4.497594 |
| 242739_at | 0.375   | 2.3075  | 1.757211  | 0.139578 | 0.493394  | -4.499233 |
| 209156_s_ | 1.3975  | 6.32875 | 1.754243  | 0.140112 | 0.493394  | -4.499614 |
| 221261_x_ | 1.435   | 7.4975  | 1.734518  | 0.14371  | 0.493394  | -4.502156 |

|           |         |          |           |          |          |           |
|-----------|---------|----------|-----------|----------|----------|-----------|
| 224327_s  | -0.51   | 2.5175   | -1.726893 | 0.145126 | 0.493394 | -4.503141 |
| 239615_at | -0.4    | 2.79     | -1.710238 | 0.148267 | 0.493394 | -4.505301 |
| 201605_x  | -0.505  | 4.625    | -1.702857 | 0.149681 | 0.493394 | -4.506261 |
| 200974_at | -0.9725 | 11.82875 | -1.640955 | 0.162085 | 0.524566 | -4.514375 |
| 204077_x  | -0.2875 | 4.42375  | -1.58711  | 0.173702 | 0.552125 | -4.521517 |
| 235526_at | 0.2875  | 4.67375  | 1.529136  | 0.187127 | 0.562925 | -4.529281 |
| 233230_s  | -0.3325 | 1.79375  | -1.524439 | 0.188258 | 0.562925 | -4.529913 |
| 235173_at | -0.9975 | 5.54625  | -1.512195 | 0.191238 | 0.562925 | -4.531562 |
| 203265_s  | 0.3825  | 3.48375  | 1.508502  | 0.192145 | 0.562925 | -4.53206  |
| 221737_at | 0.27    | 7.3975   | 1.504021  | 0.193252 | 0.562925 | -4.532664 |
| 226592_at | 0.7475  | 4.07375  | 1.492705  | 0.196075 | 0.562925 | -4.534192 |
| 202552_s  | -0.51   | 8.4525   | -1.464792 | 0.20321  | 0.574148 | -4.53797  |
| 1554531_e | -0.22   | 2.03     | -1.422562 | 0.214479 | 0.59652  | -4.543703 |
| 205776_at | -0.4975 | 1.85875  | -1.391548 | 0.223132 | 0.608162 | -4.547924 |
| 230443_at | -0.37   | 2.5375   | -1.369687 | 0.229428 | 0.608162 | -4.550903 |
| 232345_at | 0.2175  | 2.14125  | 1.369348  | 0.229527 | 0.608162 | -4.550949 |
| 231926_at | -0.3175 | 2.13875  | -1.357454 | 0.233023 | 0.608162 | -4.55257  |
| 202238_s  | -1.0125 | 5.19125  | -1.348301 | 0.235748 | 0.608162 | -4.553818 |
| 229443_at | 0.4175  | 2.53875  | 1.322451  | 0.243605 | 0.60842  | -4.557343 |
| 1554522_e | 0.225   | 2.0125   | 1.321418  | 0.243924 | 0.60842  | -4.557484 |
| 217826_s  | 0.315   | 8.38     | 1.314395  | 0.246102 | 0.60842  | -4.558441 |
| 204795_at | -0.265  | 2.275    | -1.292126 | 0.253131 | 0.6085   | -4.561476 |
| 208181_at | 0.2325  | 2.05125  | 1.278792  | 0.257427 | 0.6085   | -4.563291 |
| 218825_at | 0.2175  | 3.53625  | 1.27762   | 0.257808 | 0.6085   | -4.563451 |
| 205680_at | -1.3775 | 4.83875  | -1.271486 | 0.259809 | 0.6085   | -4.564286 |
| 226064_s  | -0.51   | 2.5425   | -1.249876 | 0.266974 | 0.611121 | -4.567224 |
| 231399_at | 0.24    | 4.135    | 1.247435  | 0.267795 | 0.611121 | -4.567556 |
| 232348_at | 0.2075  | 1.97625  | 1.216769  | 0.278299 | 0.627053 | -4.571716 |
| 222018_at | -0.435  | 7.685    | -1.191662 | 0.287173 | 0.63896  | -4.575111 |
| 205391_x  | -0.19   | 2.435    | -1.161609 | 0.298127 | 0.648187 | -4.57916  |
| 222315_at | 0.3175  | 3.31625  | 1.158037  | 0.299453 | 0.648187 | -4.57964  |
| 229899_s  | 0.375   | 5.12     | 1.150564  | 0.302244 | 0.648187 | -4.580643 |
| 238920_at | 0.3875  | 3.52625  | 1.091586  | 0.325085 | 0.653346 | -4.588506 |
| 1561595_x | 0.265   | 2.3175   | 1.091234  | 0.325225 | 0.653346 | -4.588552 |
| 1559315_s | 0.555   | 3.1225   | 1.080331  | 0.329609 | 0.653346 | -4.589994 |
| 217099_s  | -0.4175 | 4.14875  | -1.079607 | 0.329902 | 0.653346 | -4.59009  |
| 1552685_e | -0.165  | 1.605    | -1.07705  | 0.330938 | 0.653346 | -4.590427 |
| 229407_at | 0.26    | 3.0875   | 1.067599  | 0.334792 | 0.653346 | -4.591672 |
| 227048_at | 0.165   | 1.4225   | 1.066809  | 0.335116 | 0.653346 | -4.591776 |
| 230577_at | -0.775  | 2.6      | -1.062193 | 0.337014 | 0.653346 | -4.592383 |
| 200756_x  | -0.375  | 4.3725   | -1.060568 | 0.337684 | 0.653346 | -4.592597 |
| 235125_x  | -0.2375 | 9.01625  | -1.036604 | 0.3477   | 0.656162 | -4.595732 |
| 228603_at | 0.42    | 5.895    | 1.036474  | 0.347755 | 0.656162 | -4.595749 |
| 230896_at | 0.8575  | 7.88375  | 1.02844   | 0.351169 | 0.656162 | -4.596795 |
| 226671_at | -0.225  | 7.4075   | -1.022095 | 0.353885 | 0.656162 | -4.597619 |
| 208782_at | 0.2575  | 12.17125 | 1.008684  | 0.359684 | 0.660038 | -4.599355 |
| 213459_at | 0.18    | 7.4125   | 0.961537  | 0.380696 | 0.684842 | -4.605387 |
| 1554348_s | 0.3875  | 2.76125  | 0.961101  | 0.380895 | 0.684842 | -4.605443 |
| 206463_s  | -0.165  | 2.0725   | -0.925284 | 0.397524 | 0.698332 | -4.609945 |
| 204896_s  | -0.175  | 1.625    | -0.917413 | 0.401255 | 0.698332 | -4.610924 |
| 239045_at | -0.32   | 2.5025   | -0.910771 | 0.404425 | 0.698332 | -4.611747 |
| 232797_at | -0.2125 | 2.52625  | -0.900372 | 0.409428 | 0.698332 | -4.613031 |

|           |         |         |           |          |          |           |
|-----------|---------|---------|-----------|----------|----------|-----------|
| 213422_s_ | -0.4675 | 5.19125 | -0.895534 | 0.411773 | 0.698332 | -4.613625 |
| 225731_at | 0.26    | 8.66    | 0.894627  | 0.412214 | 0.698332 | -4.613737 |
| 205726_at | -0.3025 | 8.26625 | -0.887149 | 0.415861 | 0.698332 | -4.614652 |
| 1557129_e | 0.3675  | 2.49625 | 0.874899  | 0.42189  | 0.701835 | -4.616144 |
| 225727_at | 0.5325  | 6.82375 | 0.841999  | 0.438416 | 0.722575 | -4.620098 |
| 210787_s_ | 0.3225  | 3.03875 | 0.833219  | 0.442909 | 0.723283 | -4.62114  |
| 214038_at | -0.3275 | 2.85625 | -0.823812 | 0.447762 | 0.72456  | -4.62225  |
| 230306_at | 0.225   | 6.7175  | 0.815967  | 0.451839 | 0.724571 | -4.62317  |
| 217013_at | -0.1475 | 2.35875 | -0.792216 | 0.464352 | 0.731038 | -4.625924 |
| 230762_at | -0.2975 | 3.61875 | -0.788693 | 0.46623  | 0.731038 | -4.626329 |
| 240278_at | -0.1475 | 2.38875 | -0.772514 | 0.474925 | 0.731038 | -4.628173 |
| 202908_at | -0.3275 | 5.28125 | -0.772287 | 0.475048 | 0.731038 | -4.628199 |
| 218523_at | 0.1375  | 3.07625 | 0.762095  | 0.480586 | 0.731038 | -4.629349 |
| 219122_s_ | -0.4175 | 6.28375 | -0.752831 | 0.485661 | 0.731038 | -4.630386 |
| 244116_at | 0.14    | 5.3825  | 0.75274   | 0.485711 | 0.731038 | -4.630396 |
| 215064_at | -0.1275 | 1.73125 | -0.747266 | 0.488728 | 0.731038 | -4.631005 |
| 222666_s_ | 0.2875  | 2.80875 | 0.728265  | 0.499303 | 0.740633 | -4.633098 |
| 233002_at | 0.11    | 2.3325  | 0.709196  | 0.510077 | 0.749711 | -4.635163 |
| 206984_s_ | 0.1225  | 1.59875 | 0.70259   | 0.513847 | 0.749711 | -4.63587  |
| 218611_at | 0.265   | 5.7825  | 0.691851  | 0.520016 | 0.752543 | -4.63701  |
| 227490_at | 0.1275  | 3.08625 | 0.67593   | 0.529255 | 0.757617 | -4.638678 |
| 239242_at | 0.5475  | 3.17875 | 0.663251  | 0.536691 | 0.757617 | -4.639987 |
| 203294_s_ | -0.1025 | 2.30125 | -0.648565 | 0.54539  | 0.757617 | -4.641482 |
| 238619_at | -0.255  | 3.9325  | -0.64038  | 0.550279 | 0.757617 | -4.642305 |
| 212425_at | -0.2475 | 3.12125 | -0.638035 | 0.551685 | 0.757617 | -4.64254  |
| 204696_s_ | -0.1225 | 1.96875 | -0.637806 | 0.551822 | 0.757617 | -4.642562 |
| 229677_at | 0.0975  | 3.34625 | 0.619177  | 0.563076 | 0.757617 | -4.644402 |
| 235360_at | 0.1075  | 6.79875 | 0.618609  | 0.563421 | 0.757617 | -4.644457 |
| 202132_at | -0.245  | 7.505   | -0.614313 | 0.566038 | 0.757617 | -4.644875 |
| 230631_s_ | -0.195  | 2.635   | -0.614236 | 0.566085 | 0.757617 | -4.644883 |
| 214845_s_ | -0.345  | 4.615   | -0.596357 | 0.577059 | 0.760856 | -4.6466   |
| 238526_at | 0.185   | 6.9225  | 0.593007  | 0.57913  | 0.760856 | -4.646917 |
| 1563469_e | 0.16    | 2.8025  | 0.58946   | 0.581328 | 0.760856 | -4.647252 |
| 205968_at | -0.25   | 7.77    | -0.554463 | 0.603287 | 0.779274 | -4.650471 |
| 229912_at | -0.18   | 3.725   | -0.528745 | 0.619735 | 0.779274 | -4.652739 |
| 239877_at | -0.0825 | 1.66625 | -0.52855  | 0.619861 | 0.779274 | -4.652755 |
| 242445_at | -0.08   | 1.625   | -0.521703 | 0.624284 | 0.779274 | -4.653344 |
| 230133_at | -0.0975 | 2.31875 | -0.513201 | 0.629801 | 0.779274 | -4.654067 |
| 1556678_e | -0.125  | 5.1575  | -0.51303  | 0.629912 | 0.779274 | -4.654081 |
| 225726_s_ | 0.21    | 8.94    | 0.51197   | 0.630602 | 0.779274 | -4.654171 |
| 239342_at | 0.08    | 1.8425  | 0.507773  | 0.633338 | 0.779274 | -4.654523 |
| 215253_s_ | -0.1075 | 2.14625 | -0.505531 | 0.634802 | 0.779274 | -4.654711 |
| 227997_at | -0.2525 | 6.12125 | -0.485814 | 0.647759 | 0.789734 | -4.656328 |
| 231011_at | -0.08   | 2.465   | -0.449584 | 0.671939 | 0.813641 | -4.65916  |
| 238228_at | -0.105  | 5.1625  | -0.418907 | 0.692772 | 0.833199 | -4.661411 |
| 227019_at | -0.085  | 3.055   | -0.394656 | 0.709464 | 0.839466 | -4.663092 |
| 243724_at | -0.0775 | 4.15375 | -0.39137  | 0.71174  | 0.839466 | -4.663312 |
| 235974_at | 0.195   | 2.815   | 0.390806  | 0.712131 | 0.839466 | -4.66335  |
| 214222_at | -0.1075 | 2.67375 | -0.374761 | 0.723297 | 0.847019 | -4.664404 |
| 238127_at | -0.1425 | 3.99125 | -0.365163 | 0.730015 | 0.849298 | -4.665015 |
| 228489_at | -0.2225 | 3.14875 | -0.33062  | 0.754414 | 0.871985 | -4.667096 |
| 1553346_e | 0.05    | 1.5775  | 0.286033  | 0.786392 | 0.903082 | -4.669498 |

|           |         |         |           |          |          |           |
|-----------|---------|---------|-----------|----------|----------|-----------|
| 241360_at | -0.06   | 2.6625  | -0.249608 | 0.812879 | 0.919757 | -4.671218 |
| 1560071_e | -0.0425 | 1.98125 | -0.236178 | 0.822719 | 0.919757 | -4.671795 |
| 205020_s  | -0.1125 | 6.80125 | -0.23138  | 0.826244 | 0.919757 | -4.671994 |
| 222412_s  | -0.1275 | 7.53375 | -0.229831 | 0.827382 | 0.919757 | -4.672058 |
| 220363_s  | -0.0375 | 2.07875 | -0.215256 | 0.838122 | 0.919757 | -4.672634 |
| 230334_at | -0.065  | 3.9075  | -0.214097 | 0.838978 | 0.919757 | -4.672678 |
| 206085_s  | 0.0325  | 1.70875 | 0.208734  | 0.842941 | 0.919757 | -4.67288  |
| 229370_at | 0.105   | 3.985   | 0.207089  | 0.844158 | 0.919757 | -4.672941 |
| 228806_at | -0.1275 | 6.94125 | -0.202687 | 0.847416 | 0.919757 | -4.673102 |
| 242722_at | -0.0625 | 6.23625 | -0.186135 | 0.859698 | 0.927431 | -4.673676 |
| 220031_at | -0.0275 | 1.72875 | -0.170472 | 0.871362 | 0.934352 | -4.674176 |
| 220080_at | 0.03    | 1.7025  | 0.15513   | 0.882822 | 0.940972 | -4.674624 |
| 238339_x  | 0.02    | 2.0325  | 0.1311    | 0.900837 | 0.954459 | -4.675242 |
| 204695_at | -0.025  | 4.005   | -0.112314 | 0.91497  | 0.958219 | -4.675653 |
| 206143_at | -0.0175 | 1.52625 | -0.110068 | 0.916662 | 0.958219 | -4.675698 |
| 1555270_e | 0.0175  | 2.45875 | 0.092775  | 0.929706 | 0.958219 | -4.676014 |
| 235405_at | 0.065   | 6.2575  | 0.091605  | 0.930589 | 0.958219 | -4.676034 |
| 225625_at | -0.0225 | 5.34375 | -0.090362 | 0.931528 | 0.958219 | -4.676054 |
| 1552266_e | 0.015   | 2.215   | 0.080738  | 0.9388   | 0.958219 | -4.676203 |
| 216307_at | 0.0125  | 1.61125 | 0.076416  | 0.942069 | 0.958219 | -4.676264 |
| 204942_s  | -0.025  | 6.595   | -0.062059 | 0.952935 | 0.963763 | -4.676444 |
| 239642_at | -0.005  | 1.8875  | -0.029958 | 0.977267 | 0.982788 | -4.676711 |
| 221919_at | -0.005  | 5.0225  | -0.020658 | 0.984322 | 0.984322 | -4.676754 |
