# Supplementary material
Source: PubMed Central journal article supplement (PMC3077061)
Supplement: NIHMS265571-supplement-17.pdf [file NIHMS265571-supplement-17.pdf]

| probe        | Estimate  | St Error | tvalue    | Pvalue   | X177  | X178  | X179  | X180  |
|--------------|-----------|----------|-----------|----------|-------|-------|-------|-------|
| 205776_at    | -0.307576 | 0.042948 | -7.161566 | 8.35E-10 | 8.01  | 7.13  | 5.65  | 5.79  |
| 238526_at    | -1.105697 | 0.201754 | -5.48042  | 7.16E-07 | 7.53  | 7.02  | 7.83  | 6.85  |
| 226448_at    | -1.392286 | 0.28815  | -4.831808 | 8.41E-06 | 2.36  | 2.28  | 3.01  | 2.14  |
| 242722_at    | -0.44823  | 0.095187 | -4.708947 | 1.32E-05 | 8.35  | 8.65  | 9.27  | 7.35  |
| 229590_at    | -0.520342 | 0.112467 | -4.626626 | 1.79E-05 | 6.88  | 8.42  | 9.13  | 8.15  |
| 229899_s_at  | -0.447899 | 0.097426 | -4.597339 | 1.99E-05 | 7.04  | 6.81  | 6.33  | 6.93  |
| 221737_at    | 1.24618   | 0.281839 | 4.4216    | 3.74E-05 | 7.16  | 6.44  | 6.88  | 6.91  |
| 233002_at    | 1.166504  | 0.267876 | 4.354648  | 4.75E-05 | 1.47  | 1.61  | 1.76  | 1.85  |
| 209357_at    | -0.56333  | 0.131301 | -4.290367 | 5.96E-05 | 9.24  | 7.75  | 8.98  | 7.68  |
| 238228_at    | -0.546201 | 0.132987 | -4.107194 | 0.000113 | 7.38  | 6.41  | 6.46  | 5.99  |
| 217099_s_at  | -0.452789 | 0.117107 | -3.86645  | 0.000255 | 4.15  | 4.93  | 4.72  | 4.8   |
| 230896_at    | -0.298023 | 0.0787   | -3.78681  | 0.000332 | 9.69  | 9.3   | 9.41  | 9.97  |
| 229407_at    | -0.277347 | 0.073262 | -3.785706 | 0.000333 | 4.67  | 3.51  | 3.64  | 5.29  |
| 217013_at    | -1.024291 | 0.271544 | -3.772105 | 0.000349 | 3.45  | 3.26  | 3.26  | 2.46  |
| 207980_s_at  | -0.288911 | 0.078974 | -3.658317 | 0.000506 | 8.23  | 5.21  | 6.56  | 4.32  |
| 229912_at    | -0.288134 | 0.079453 | -3.626446 | 0.00056  | 4.53  | 4.75  | 5.19  | 6.26  |
| 220080_at    | -1.098402 | 0.303608 | -3.617828 | 0.000576 | 1.55  | 1.82  | 2.45  | 2.05  |
| 206574_s_at  | -0.307244 | 0.086935 | -3.534172 | 0.000753 | 6.38  | 4.36  | 6.18  | 3.59  |
| 218611_at    | 0.422184  | 0.120144 | 3.513975  | 0.000803 | 3.69  | 5.91  | 2.95  | 4.95  |
| 239615_at    | -0.809937 | 0.238884 | -3.390495 | 0.001182 | 4.46  | 3.14  | 3.23  | 3.1   |
| 235405_at    | -0.26874  | 0.081451 | -3.299422 | 0.001564 | 10.21 | 8.29  | 7.95  | 6.98  |
| 231468_at    | -0.473159 | 0.144267 | -3.279735 | 0.001661 | 2.5   | 4.12  | 2.74  | 3.02  |
| 203265_s_at  | -0.607904 | 0.188463 | -3.225586 | 0.001957 | 4.97  | 3.54  | 3.83  | 3.62  |
| 235360_at    | 0.361873  | 0.11372  | 3.182146  | 0.002229 | 4.53  | 4.25  | 5.75  | 6.46  |
| 202238_s_at  | 0.351353  | 0.110913 | 3.167838  | 0.002327 | 4.34  | 3.7   | 4.68  | 4.29  |
| 219301_s_at  | -0.289644 | 0.091721 | -3.157871 | 0.002397 | 8.26  | 9.79  | 10.33 | 9.05  |
| 238573_at    | -0.421306 | 0.135639 | -3.10608  | 0.002794 | 5.59  | 5.66  | 5.32  | 4.87  |
| 208782_at    | 0.536727  | 0.174386 | 3.07781   | 0.003036 | 11.73 | 10.48 | 12.48 | 12.71 |
| 222304_x_at  | -0.242678 | 0.079454 | -3.054331 | 0.003251 | 5.97  | 6.92  | 5.45  | 7.53  |
| 227019_at    | 0.681748  | 0.234787 | 2.90369   | 0.005011 | 3.82  | 2.18  | 2.5   | 3.31  |
| 223741_s_at  | 0.400043  | 0.139374 | 2.870284  | 0.005505 | 4.21  | 5.46  | 4.45  | 5.36  |
| 225726_s_at  | -0.414252 | 0.145448 | -2.848118 | 0.005858 | 10.73 | 9.57  | 8.18  | 10.58 |
| 1555270_a_at | -0.78766  | 0.279685 | -2.816239 | 0.006401 | 4.26  | 3.35  | 3.34  | 3.44  |
| 231011_at    | -0.718319 | 0.26194  | -2.742306 | 0.007845 | 3.49  | 2.67  | 2.71  | 2.32  |
| 239242_at    | 0.443967  | 0.163205 | 2.7203    | 0.008329 | 2.18  | 2.4   | 2.37  | 2.8   |
| 225727_at    | -0.321906 | 0.119066 | -2.703591 | 0.008715 | 9.05  | 7.43  | 6.1   | 8.79  |
| 200974_at    | -0.364293 | 0.135622 | -2.686082 | 0.009136 | 10.67 | 13.38 | 10.7  | 10.44 |
| 1552266_at   | -0.433914 | 0.163131 | -2.65991  | 0.009801 | 2.13  | 3.14  | 2.35  | 2.49  |
| 239045_at    | 0.820414  | 0.313039 | 2.620803  | 0.010877 | 2.16  | 1.83  | 2.73  | 2.1   |
| 232797_at    | -0.532042 | 0.203243 | -2.617768 | 0.010965 | 4.38  | 1.97  | 2.88  | 3.35  |
| 214291_at    | -0.310716 | 0.122023 | -2.546364 | 0.013226 | 5.71  | 4.24  | 5.94  | 5.09  |
| 202552_s_at  | 0.467187  | 0.186061 | 2.510941  | 0.014498 | 8.46  | 8.36  | 7.21  | 8.2   |
| 206463_s_at  | -1.276036 | 0.521069 | -2.448883 | 0.016994 | 2.45  | 2.03  | 2.41  | 2.06  |
| 205131_x_at  | 0.708589  | 0.294658 | 2.404785  | 0.018995 | 2.71  | 2.91  | 2.75  | 3.46  |
| 204624_at    | -0.294092 | 0.123714 | -2.377193 | 0.020352 | 6.33  | 4.99  | 4.6   | 6.61  |
| 238920_at    | 0.474105  | 0.203258 | 2.332533  | 0.022732 | 2.61  | 2.89  | 4.15  | 3.99  |
| 221919_at    | -0.549567 | 0.244136 | -2.251066 | 0.027717 | 5.19  | 4.74  | 5.12  | 5.27  |
| 230631_s_at  | -0.436695 | 0.194072 | -2.25017  | 0.027777 | 5.39  | 3.25  | 2.66  | 2.31  |
| 212425_at    | -0.472542 | 0.213253 | -2.215869 | 0.030154 | 3.85  | 2.64  | 3.54  | 3.5   |
| 230577_at    | -0.119362 | 0.054524 | -2.189154 | 0.032127 | 6.12  | 7.29  | 8.56  | 1.94  |

|              |           |          |           |          |      |       |      |      |
|--------------|-----------|----------|-----------|----------|------|-------|------|------|
| 239642_at    | -1.037853 | 0.478038 | -2.171069 | 0.033527 | 1.88 | 2     | 2.24 | 2.04 |
| 214222_at    | -0.294856 | 0.136418 | -2.161419 | 0.034295 | 4.71 | 3.17  | 3.99 | 3.05 |
| 1561542_at   | -0.208628 | 0.097012 | -2.150531 | 0.03518  | 5.68 | 3.18  | 6.45 | 2.42 |
| 231399_at    | -0.206197 | 0.096265 | -2.141975 | 0.03589  | 7.42 | 3.28  | 6.47 | 4.94 |
| 222315_at    | -0.304109 | 0.142221 | -2.138286 | 0.0362   | 4.62 | 4.01  | 4.16 | 4.34 |
| 220031_at    | -2.200543 | 1.029878 | -2.136702 | 0.036333 | 1.96 | 1.79  | 1.86 | 1.62 |
| 210764_s_at  | -0.226976 | 0.106649 | -2.12825  | 0.037054 | 4.64 | 8.04  | 5.66 | 5.49 |
| 202908_at    | -0.349481 | 0.164569 | -2.123609 | 0.037455 | 7.4  | 6.37  | 7.01 | 6.29 |
| 1564907_s_at | -0.57442  | 0.272624 | -2.107006 | 0.038921 | 3.03 | 3.17  | 3.48 | 3.72 |
| 225731_at    | 0.335704  | 0.160105 | 2.096769  | 0.03985  | 6.94 | 8.52  | 6.83 | 8.22 |
| 226671_at    | -0.268432 | 0.128451 | -2.089757 | 0.040497 | 9.41 | 8.26  | 9.51 | 8.02 |
| 205680_at    | 0.126235  | 0.060462 | 2.087836  | 0.040676 | 2.25 | 2.13  | 2.5  | 5.27 |
| 231029_at    | 0.115881  | 0.055906 | 2.072787  | 0.042101 | 2.66 | 2.15  | 1.65 | 5.88 |
| 217826_s_at  | -0.32734  | 0.158329 | -2.06747  | 0.042615 | 8.76 | 8.91  | 8.7  | 8.17 |
| 228603_at    | 0.297396  | 0.144451 | 2.0588    | 0.043464 | 5.91 | 5.6   | 4.9  | 5.69 |
| 203294_s_at  | -1.433417 | 0.70023  | -2.047066 | 0.044637 | 2.57 | 2.4   | 2.4  | 2.25 |
| 228806_at    | -0.254185 | 0.125689 | -2.022337 | 0.047198 | 7.38 | 7.08  | 7.44 | 7.63 |
| 205968_at    | 0.173427  | 0.086884 | 1.996085  | 0.050053 | 6.16 | 5.23  | 4.51 | 7.52 |
| 206085_s_at  | 1.400828  | 0.703846 | 1.990248  | 0.050708 | 1.59 | 1.51  | 1.72 | 1.62 |
| 233063_s_at  | -0.391133 | 0.200864 | -1.947248 | 0.055762 | 4.46 | 4.42  | 4.98 | 5.01 |
| 239342_at    | 1.770149  | 0.921193 | 1.921583  | 0.058978 | 1.86 | 1.76  | 1.72 | 1.81 |
| 1552685_a_at | -1.607128 | 0.845098 | -1.901706 | 0.061576 | 1.7  | 1.53  | 1.92 | 1.84 |
| 232176_at    | -0.233717 | 0.124006 | -1.884728 | 0.063871 | 2.23 | 6.11  | 2.67 | 2.09 |
| 229370_at    | 0.354713  | 0.189645 | 1.870408  | 0.065862 | 3.64 | 3.26  | 3.68 | 4.08 |
| 218825_at    | 0.497233  | 0.266761 | 1.863964  | 0.066775 | 3.23 | 3.39  | 3.16 | 2.72 |
| 204896_s_at  | -1.864258 | 1.0111   | -1.843792 | 0.069703 | 1.54 | 1.59  | 1.87 | 1.6  |
| 208352_x_at  | -0.475232 | 0.259081 | -1.8343   | 0.071118 | 2.3  | 2.96  | 2.47 | 2.35 |
| 238156_at    | -0.431928 | 0.238496 | -1.81105  | 0.074684 | 8.25 | 8.01  | 7.9  | 8.2  |
| 243724_at    | -0.895991 | 0.498879 | -1.79601  | 0.07707  | 4.26 | 4.27  | 4.96 | 4.47 |
| 205391_x_at  | -0.508724 | 0.287105 | -1.77191  | 0.081025 | 2.28 | 2.58  | 2.65 | 2.46 |
| 230443_at    | 0.569463  | 0.32321  | 1.761897  | 0.082717 | 2.36 | 2.81  | 2.91 | 2.24 |
| 244116_at    | -0.123006 | 0.070832 | -1.736599 | 0.087124 | 5.62 | 7.17  | 7.19 | 4.61 |
| 205020_s_at  | -0.222823 | 0.128317 | -1.736511 | 0.087139 | 7.72 | 7.62  | 7.33 | 6.74 |
| 208181_at    | 0.906485  | 0.524018 | 1.729876  | 0.088327 | 2.52 | 2.03  | 2.33 | 2.44 |
| 240110_at    | -0.277549 | 0.163208 | -1.700581 | 0.09373  | 3.37 | 3.19  | 2.48 | 3.08 |
| 201289_at    | -0.199364 | 0.118459 | -1.682988 | 0.097103 | 8.06 | 11.25 | 9.34 | 9.34 |
| 235173_at    | -0.273058 | 0.164077 | -1.664209 | 0.100812 | 4.9  | 6.16  | 5.12 | 5.88 |
| 235125_x_at  | -0.343915 | 0.21031  | -1.635278 | 0.106752 | 9.12 | 8.68  | 9.58 | 8.89 |
| 206143_at    | -0.082199 | 0.052695 | -1.559906 | 0.123565 | 8.74 | 1.74  | 4.13 | 1.46 |
| 242445_at    | -1.183583 | 0.759701 | -1.55796  | 0.124025 | 1.85 | 1.73  | 1.97 | 1.76 |
| 231577_s_at  | 0.106572  | 0.069009 | 1.544327  | 0.127291 | 4.09 | 8.92  | 6.67 | 7.19 |
| 205726_at    | 0.263781  | 0.172444 | 1.529663  | 0.130879 | 7.47 | 8.5   | 6.69 | 7.69 |
| 1554531_at   | -0.578933 | 0.383779 | -1.508506 | 0.136198 | 2.45 | 2.12  | 2.63 | 2.06 |
| 213778_x_at  | -0.381724 | 0.253175 | -1.507747 | 0.136391 | 3.13 | 3.74  | 4.04 | 4.4  |
| 243063_at    | 0.156283  | 0.105699 | 1.478563  | 0.144014 | 4.03 | 4.7   | 3.48 | 3.78 |
| 244786_at    | 0.188105  | 0.128035 | 1.469171  | 0.146537 | 4.78 | 4.95  | 5.02 | 4.84 |
| 239877_at    | -1.60347  | 1.105105 | -1.450966 | 0.151526 | 1.69 | 1.73  | 1.62 | 1.61 |
| 220016_at    | 0.313786  | 0.220379 | 1.423849  | 0.159201 | 3.02 | 3.71  | 2.54 | 2.4  |
| 222412_s_at  | -0.187098 | 0.132288 | -1.414326 | 0.161967 | 8.7  | 7.99  | 8.32 | 8.4  |
| 222666_s_at  | 0.277687  | 0.197393 | 1.40677   | 0.164187 | 2.07 | 2.31  | 2.62 | 4.02 |
| 1556678_a_at | -0.227657 | 0.165505 | -1.375529 | 0.173618 | 6.26 | 4.84  | 5.08 | 5.9  |
| 233230_s_at  | -0.380682 | 0.286974 | -1.326535 | 0.189234 | 1.88 | 1.91  | 2.29 | 2.38 |

|              |           |          |           |          |       |      |      |      |
|--------------|-----------|----------|-----------|----------|-------|------|------|------|
| 210787_s_at  | -0.154994 | 0.118224 | -1.311017 | 0.194395 | 3.36  | 2.88 | 6.53 | 2.85 |
| 1554348_s_at | 0.273769  | 0.20964  | 1.305899  | 0.19612  | 2.38  | 2.05 | 2.24 | 2.85 |
| 235976_at    | -0.163837 | 0.125513 | -1.305335 | 0.196311 | 2.15  | 6.29 | 2.88 | 1.99 |
| 226064_s_at  | 0.222444  | 0.171642 | 1.295974  | 0.199498 | 2.73  | 2.07 | 2.19 | 3.06 |
| 214947_at    | -0.205894 | 0.163049 | -1.262776 | 0.211113 | 6     | 1.78 | 1.87 | 1.61 |
| 204696_s_at  | -0.642599 | 0.512291 | -1.254363 | 0.214134 | 1.88  | 1.98 | 2.12 | 1.8  |
| 215145_s_at  | -0.123694 | 0.102382 | -1.208154 | 0.231299 | 2.73  | 4.25 | 5.93 | 3.92 |
| 202134_s_at  | -0.451527 | 0.377551 | -1.195935 | 0.236001 | 2.42  | 2.42 | 2.05 | 1.99 |
| 225625_at    | -0.240865 | 0.206502 | -1.166403 | 0.247649 | 4.92  | 6.1  | 6.08 | 5.14 |
| 229443_at    | 0.275444  | 0.237315 | 1.160668  | 0.249958 | 3.28  | 2.11 | 2.76 | 2.99 |
| 202132_at    | -0.178988 | 0.154486 | -1.158605 | 0.250792 | 6.16  | 8.21 | 6.23 | 6.89 |
| 206984_s_at  | 0.566611  | 0.50504  | 1.121913  | 0.265965 | 1.67  | 1.62 | 1.85 | 1.4  |
| 1559315_s_at | -0.108885 | 0.09732  | -1.11883  | 0.267268 | 5.17  | 3.88 | 7.37 | 2.64 |
| 202270_at    | 0.082772  | 0.074294 | 1.11411   | 0.269273 | 3.56  | 7.93 | 4.9  | 5.58 |
| 216960_s_at  | -0.285509 | 0.263133 | -1.085037 | 0.281853 | 6.86  | 6.83 | 6.67 | 7.06 |
| 238853_at    | -0.111852 | 0.105285 | -1.062369 | 0.29194  | 8.04  | 5.59 | 7.38 | 6.3  |
| 204942_s_at  | -0.076199 | 0.074672 | -1.020451 | 0.311241 | 9.4   | 6.34 | 7.41 | 8.61 |
| 202269_x_at  | 0.069789  | 0.070048 | 0.996309  | 0.322739 | 3.35  | 8.56 | 5.93 | 6.85 |
| 214038_at    | 0.126384  | 0.127607 | 0.990415  | 0.325589 | 2.11  | 2.59 | 2.1  | 3.01 |
| 228489_at    | -0.087919 | 0.090147 | -0.975282 | 0.332981 | 2.28  | 2.53 | 1.69 | 1.94 |
| 214870_x_at  | 0.267628  | 0.285706 | 0.936724  | 0.352316 | 10.31 | 9.59 | 9.71 | 9.68 |
| 236229_at    | -0.133556 | 0.144255 | -0.925833 | 0.357906 | 7.8   | 5.64 | 7.98 | 7.2  |
| 204384_at    | 0.146041  | 0.1621   | 0.900934  | 0.370899 | 7.99  | 7.07 | 7.57 | 6.83 |
| 227126_at    | 0.140444  | 0.156875 | 0.895259  | 0.373902 | 1.8   | 1.86 | 2.32 | 3.15 |
| 241837_at    | -0.096814 | 0.108385 | -0.893237 | 0.374976 | 7.45  | 5.29 | 6.93 | 6.62 |
| 218523_at    | -0.519633 | 0.586958 | -0.885297 | 0.37921  | 3.72  | 3.21 | 2.86 | 3.23 |
| 219122_s_at  | -0.160379 | 0.182319 | -0.879666 | 0.382232 | 5.4   | 6.31 | 5.88 | 6.68 |
| 215064_at    | -0.654423 | 0.746329 | -0.876855 | 0.383746 | 1.73  | 1.91 | 1.83 | 1.65 |
| 228702_at    | -0.112076 | 0.136262 | -0.822507 | 0.41375  | 6.85  | 7.7  | 7.44 | 7.21 |
| 235526_at    | -0.140462 | 0.171063 | -0.821109 | 0.41454  | 5.72  | 5.58 | 5.42 | 5.42 |
| 201605_x_at  | -0.180379 | 0.22477  | -0.802504 | 0.425142 | 4.51  | 5.57 | 5.26 | 4.55 |
| 204077_x_at  | -0.242825 | 0.305182 | -0.795671 | 0.429076 | 4.27  | 4.57 | 4.38 | 4.5  |
| 204795_at    | -0.34406  | 0.437818 | -0.785852 | 0.434767 | 1.92  | 1.97 | 1.8  | 1.84 |
| 200756_x_at  | -0.197763 | 0.251814 | -0.785354 | 0.435057 | 4.6   | 4.06 | 4.67 | 5.55 |
| 230306_at    | -0.152483 | 0.205352 | -0.742544 | 0.460392 | 7.82  | 5.73 | 5.76 | 6.6  |
| 1557129_a_at | 0.127723  | 0.172355 | 0.741045  | 0.461295 | 2.18  | 1.93 | 2.96 | 2.41 |
| 204695_at    | -0.148123 | 0.202007 | -0.733254 | 0.466    | 4.22  | 3.96 | 4.63 | 4.18 |
| 213459_at    | -0.140584 | 0.19314  | -0.727884 | 0.469259 | 6.62  | 7.5  | 7.14 | 7.21 |
| 230334_at    | 0.216437  | 0.312785 | 0.691969  | 0.491384 | 3.43  | 3.96 | 3.75 | 3.29 |
| 224327_s_at  | 0.228707  | 0.339892 | 0.672883  | 0.503371 | 2.98  | 2.1  | 2.08 | 2.88 |
| 232345_at    | 0.445863  | 0.672722 | 0.662775  | 0.509783 | 2.21  | 2.22 | 2.02 | 2.15 |
| 215253_s_at  | 0.354592  | 0.58289  | 0.608334  | 0.545054 | 1.95  | 1.92 | 1.98 | 1.91 |
| 213422_s_at  | 0.096248  | 0.1589   | 0.605715  | 0.546782 | 3.48  | 5.9  | 3.72 | 3.76 |
| 214845_s_at  | -0.079948 | 0.139953 | -0.571248 | 0.569772 | 5.02  | 3.79 | 5.13 | 6.31 |
| 232348_at    | -0.404996 | 0.710197 | -0.570259 | 0.570438 | 2.05  | 1.96 | 1.92 | 1.82 |
| 221261_x_at  | -0.02869  | 0.05118  | -0.560578 | 0.576983 | 2.62  | 6.69 | 3.28 | 8.98 |
| 229677_at    | 0.2725    | 0.525031 | 0.519017  | 0.605485 | 3.27  | 3.13 | 3.31 | 3.15 |
| 1563469_at   | 0.091704  | 0.177171 | 0.5176    | 0.606468 | 3.75  | 2.48 | 3.53 | 3.64 |
| 226848_at    | -0.074145 | 0.147575 | -0.502422 | 0.617043 | 7.37  | 7.11 | 6.37 | 6.67 |
| 238619_at    | -0.076705 | 0.155105 | -0.494535 | 0.622571 | 5.87  | 3.66 | 4.46 | 4.14 |
| 240278_at    | 0.155995  | 0.328773 | 0.474476  | 0.636726 | 4.14  | 2.11 | 2.37 | 1.69 |
| 231926_at    | 0.157639  | 0.356683 | 0.441958  | 0.659964 | 2.04  | 2.09 | 2.29 | 2.63 |

|              |           |          |           |          |      |      |      |      |
|--------------|-----------|----------|-----------|----------|------|------|------|------|
| 220363_s_at  | 0.227828  | 0.520312 | 0.437867  | 0.662913 | 2.07 | 1.81 | 1.71 | 2.37 |
| 1553346_a_at | -0.421251 | 0.965632 | -0.436244 | 0.664083 | 1.54 | 1.52 | 1.63 | 1.61 |
| 1561595_x_at | 0.210599  | 0.496942 | 0.423789  | 0.673097 | 2.52 | 3.05 | 2.34 | 2.27 |
| 222018_at    | -0.073573 | 0.183211 | -0.401578 | 0.689292 | 7.61 | 7.8  | 7.95 | 7.51 |
| 241360_at    | 0.051262  | 0.139702 | 0.366939  | 0.714838 | 3.14 | 2.78 | 2.63 | 1.93 |
| 202551_s_at  | 0.062503  | 0.194507 | 0.321342  | 0.748966 | 8.32 | 7.14 | 6.91 | 7.45 |
| 227490_at    | 0.114271  | 0.369953 | 0.308878  | 0.758387 | 2.92 | 3.46 | 3.11 | 3.12 |
| 238127_at    | -0.031729 | 0.103284 | -0.3072   | 0.759659 | 6.81 | 3.15 | 3.3  | 5.31 |
| 228496_s_at  | 0.063146  | 0.220382 | 0.28653   | 0.77537  | 8.35 | 8.4  | 7.73 | 8.58 |
| 242739_at    | 0.070437  | 0.247473 | 0.284624  | 0.776824 | 2.69 | 2.25 | 2.12 | 2.86 |
| 227010_at    | -0.13554  | 0.483376 | -0.280402 | 0.780046 | 1.78 | 1.71 | 1.99 | 2.06 |
| 230133_at    | 0.108166  | 0.397228 | 0.272301  | 0.786241 | 2.08 | 2.15 | 2.41 | 1.59 |
| 1554522_at   | 0.109413  | 0.411849 | 0.265664  | 0.791326 | 1.94 | 2.1  | 1.98 | 2.29 |
| 221208_s_at  | -0.034344 | 0.153907 | -0.223147 | 0.82411  | 6.2  | 6.57 | 6.29 | 5.81 |
| 241652_x_at  | -0.067622 | 0.307815 | -0.219683 | 0.826796 | 2.09 | 2    | 2.2  | 1.88 |
| 226592_at    | 0.027831  | 0.136133 | 0.20444   | 0.838639 | 3.67 | 3.82 | 3.12 | 5.59 |
| 209156_s_at  | 0.01759   | 0.086774 | 0.202715  | 0.839981 | 4.28 | 7.93 | 5.51 | 3.17 |
| 216307_at    | 0.12891   | 0.928764 | 0.138797  | 0.890033 | 1.57 | 1.45 | 1.58 | 1.7  |
| 230762_at    | -0.020441 | 0.198991 | -0.102725 | 0.918493 | 2.82 | 4.04 | 4.46 | 4.97 |
| 227048_at    | 0.022777  | 0.223823 | 0.101765  | 0.919252 | 1.75 | 1.37 | 1.66 | 1.38 |
| 238339_x_at  | 0.052836  | 0.580202 | 0.091064  | 0.927717 | 1.97 | 1.87 | 1.97 | 1.83 |
| 1560071_a_at | -0.02643  | 0.343354 | -0.076977 | 0.938875 | 2.09 | 1.77 | 2.17 | 2.79 |
| 227997_at    | 0.006137  | 0.081774 | 0.075051  | 0.940401 | 8.36 | 5.99 | 3.39 | 6.61 |
| 235974_at    | -0.004683 | 0.179461 | -0.026097 | 0.979259 | 3.06 | 2.39 | 2.59 | 2.49 |

| X181  | X182  | X183  | X274  | X275  | X276  | X277  | X278  | X279  |
|-------|-------|-------|-------|-------|-------|-------|-------|-------|
| 3     | 3     | 3     | 3     | 3     | 3     | 3     | 3     | 3     |
| 5.09  | 7.95  | 4.98  | 3.58  | 6.37  | 1.57  | 5.25  | 5.96  | 7.12  |
| 7.48  | 7.12  | 7.24  | 8.23  | 7.6   | 7.32  | 7.59  | 7.76  | 7.32  |
| 2.09  | 2.4   | 2.41  | 2.06  | 3.37  | 2.98  | 2.46  | 2.67  | 3.25  |
| 5.62  | 7.78  | 8.63  | 9.13  | 7.86  | 8.72  | 5.88  | 6.53  | 7.8   |
| 7.61  | 8.77  | 7.99  | 8.53  | 9.17  | 8.24  | 8.08  | 9.08  | 9.4   |
| 6.28  | 6.91  | 5.76  | 5.17  | 5.58  | 4.54  | 5.15  | 6.47  | 6.76  |
| 7.33  | 7.23  | 6.54  | 6.64  | 6.83  | 7.37  | 6.73  | 6.61  | 6.82  |
| 2.6   | 1.63  | 1.63  | 1.55  | 1.52  | 1.5   | 1.37  | 1.45  | 1.64  |
| 8.01  | 8.4   | 7.6   | 9.17  | 7.31  | 8.54  | 6.94  | 8.94  | 8.24  |
| 5.41  | 7.01  | 5.73  | 7.03  | 6.34  | 6.77  | 6.04  | 5.46  | 6.18  |
| 5.17  | 4.79  | 3.87  | 6.13  | 4.72  | 5.1   | 4.9   | 6.37  | 6.46  |
| 9.98  | 9.55  | 9.58  | 9.93  | 9.5   | 5.19  | 9.8   | 9.48  | 9.18  |
| 6.39  | 3.39  | 4.96  | 3.23  | 2.49  | 3.72  | 3.24  | 7.4   | 2.9   |
| 2.35  | 2.9   | 3.27  | 3.83  | 2.96  | 2.88  | 2.47  | 2.78  | 2.82  |
| 5.85  | 5.42  | 4.8   | 7.45  | 3.32  | 7.09  | 4.97  | 7.01  | 7.53  |
| 6.11  | 3.77  | 4.89  | 4.27  | 1.82  | 4.84  | 4.16  | 7.14  | 3.21  |
| 1.83  | 1.99  | 2.31  | 1.77  | 2.11  | 3.21  | 1.81  | 2.01  | 1.83  |
| 5.59  | 3.96  | 6.14  | 2.8   | 4.27  | 5.27  | 5.35  | 5.91  | 6.41  |
| 4.86  | 5.02  | 5.6   | 3.99  | 4.09  | 5.64  | 4.47  | 5.35  | 5.82  |
| 2.85  | 3.62  | 2.24  | 2.7   | 2.67  | 2.76  | 3.01  | 2.81  | 2.6   |
| 7.16  | 9.75  | 7.17  | 6.39  | 9.05  | 7.88  | 5.8   | 4.23  | 7.86  |
| 2.24  | 2.89  | 2.68  | 2.51  | 2.13  | 2.35  | 1.93  | 3.66  | 3.35  |
| 3.8   | 4.03  | 3.9   | 4.21  | 3.36  | 4.3   | 3.6   | 4.36  | 3.42  |
| 7.83  | 5.36  | 4.44  | 5.41  | 5.41  | 6.53  | 5.94  | 5.09  | 4.39  |
| 4.02  | 4.23  | 4.83  | 5.25  | 3.87  | 5.91  | 5.16  | 3.67  | 3.44  |
| 8.63  | 9.2   | 10.37 | 10.31 | 9.51  | 8.6   | 9.15  | 8.85  | 10.08 |
| 6.51  | 4.27  | 4.91  | 5.24  | 5.77  | 4.08  | 4.89  | 4.29  | 5.21  |
| 12.09 | 11.05 | 11.34 | 12.4  | 11.07 | 12.27 | 12.19 | 9.93  | 10.26 |
| 4.02  | 6.68  | 6.97  | 5.37  | 8.29  | 7     | 4.68  | 5.85  | 9.96  |
| 3.57  | 2.89  | 3.63  | 3.18  | 2.69  | 3.57  | 2.91  | 2.46  | 2.33  |
| 5.41  | 5     | 4.65  | 4.41  | 5.64  | 5.03  | 6.26  | 5.73  | 5.37  |
| 10.73 | 9.82  | 9.16  | 8.37  | 9.17  | 9.54  | 9.76  | 9     | 8.95  |
| 2.43  | 1.89  | 3.3   | 3.45  | 2.57  | 2.84  | 2.28  | 2.69  | 2.28  |
| 2.95  | 2.71  | 3.32  | 3.18  | 2.76  | 2.25  | 2.49  | 2.7   | 2.55  |
| 2.53  | 2.35  | 2.49  | 2.6   | 2.43  | 2.29  | 3.07  | 1.92  | 1.94  |
| 8.78  | 7.58  | 7.37  | 6.31  | 7.16  | 7.41  | 7.44  | 6.92  | 6.71  |
| 11.27 | 11.99 | 12.41 | 10.43 | 12.02 | 12.15 | 12.34 | 12.92 | 12.69 |
| 2.71  | 2.5   | 2.26  | 2.76  | 2.52  | 4.27  | 1.98  | 4.55  | 3.51  |
| 2.17  | 2.38  | 1.87  | 2.37  | 2.29  | 1.51  | 2.04  | 1.88  | 2.2   |
| 3.04  | 2.81  | 2.94  | 2.72  | 3.19  | 3.02  | 2.2   | 2.7   | 3.3   |
| 5.62  | 5.95  | 5.8   | 4.35  | 4.41  | 4.53  | 4.17  | 5.32  | 4.96  |
| 8.31  | 8.33  | 8.22  | 6.29  | 7.97  | 7.58  | 7.99  | 7.33  | 8.42  |
| 2     | 2.13  | 2.06  | 2.6   | 2.46  | 2.49  | 2.3   | 2.17  | 2.19  |
| 2.91  | 2.46  | 2.93  | 3.3   | 2.38  | 3.51  | 2.59  | 2.66  | 2.06  |
| 5.56  | 6.47  | 3.98  | 4.09  | 5.42  | 4.59  | 6.2   | 4.04  | 5.78  |
| 3.08  | 2.38  | 4.02  | 1.87  | 2.69  | 3.23  | 2.56  | 2.89  | 2.44  |
| 4.57  | 5.18  | 5.16  | 6.21  | 5.39  | 5.19  | 5.09  | 5.89  | 5.21  |
| 2.66  | 2.74  | 2.84  | 2.74  | 4.17  | 2.14  | 2.59  | 2.94  | 2.38  |
| 3.26  | 2.68  | 3.29  | 4.3   | 3.6   | 2.08  | 3.52  | 3.5   | 2.91  |
| 1.79  | 3.06  | 8.46  | 8.99  | 5.51  | 8.91  | 2.03  | 3.21  | 1.84  |

|      |      |      |      |      |      |      |       |       |
|------|------|------|------|------|------|------|-------|-------|
| 1.84 | 1.99 | 2.36 | 1.8  | 2.73 | 1.85 | 2.35 | 2.34  | 1.98  |
| 2.28 | 3.92 | 3.89 | 3.18 | 3.72 | 2.8  | 3.41 | 3.71  | 4.48  |
| 3.52 | 3.06 | 5.4  | 8.06 | 3.52 | 6.2  | 3.56 | 4.35  | 3.62  |
| 4.82 | 4.17 | 6.4  | 6.14 | 5.45 | 4.29 | 4.39 | 2.61  | 4.22  |
| 4.27 | 2.72 | 3.16 | 4.4  | 2.91 | 4.69 | 3.4  | 3.49  | 4.4   |
| 1.75 | 1.82 | 1.64 | 2.08 | 1.93 | 1.78 | 1.7  | 1.86  | 1.67  |
| 5.21 | 5.75 | 6.29 | 4.88 | 4.98 | 4.5  | 6.21 | 7.26  | 7.69  |
| 5.59 | 5.52 | 6.7  | 7.18 | 6.01 | 6.26 | 5.63 | 4.95  | 4.92  |
| 2.9  | 3.19 | 3.11 | 3.97 | 4.85 | 3.48 | 3.84 | 3.16  | 3.46  |
| 8.44 | 8.17 | 8.61 | 7.64 | 9.21 | 7.38 | 8.26 | 8.81  | 9.06  |
| 8.04 | 8.73 | 7.26 | 8.18 | 8.67 | 7.1  | 7.17 | 6.58  | 9.46  |
| 2.61 | 2.21 | 3.16 | 3.02 | 2.27 | 1.97 | 4.06 | 4.75  | 6.42  |
| 8.01 | 2.64 | 1.83 | 3.05 | 2.69 | 1    | 7.38 | 3.8   | 6.27  |
| 9.04 | 8.8  | 8.33 | 9.35 | 9.63 | 8.44 | 8.44 | 9.55  | 9.55  |
| 6.82 | 6.17 | 3.15 | 5.01 | 6.01 | 6.34 | 6.8  | 4.17  | 6.73  |
| 2.3  | 2.26 | 2.35 | 2.23 | 2.56 | 2.38 | 2.5  | 2.41  | 2.63  |
| 8.77 | 7.47 | 7.19 | 6.63 | 7.68 | 7.97 | 7.69 | 7.75  | 8.53  |
| 7.91 | 4.12 | 6.55 | 5.04 | 4.32 | 5.75 | 8.11 | 7.41  | 3.28  |
| 1.58 | 1.56 | 1.64 | 1.93 | 1.94 | 1.71 | 1.74 | 1.51  | 1.79  |
| 4.99 | 4.69 | 5.06 | 4.98 | 4.58 | 5.06 | 4.31 | 5.49  | 4.92  |
| 1.75 | 1.74 | 1.6  | 1.72 | 1.78 | 1.87 | 1.77 | 1.73  | 1.81  |
| 1.6  | 1.6  | 1.68 | 1.6  | 1.79 | 1.7  | 1.62 | 1.65  | 1.83  |
| 2.6  | 2.62 | 3.23 | 2.12 | 2.71 | 2.23 | 3.04 | 2.4   | 3.49  |
| 2.52 | 2.98 | 3.14 | 3.04 | 2.55 | 3.55 | 4.62 | 3.74  | 2.47  |
| 3.15 | 2.95 | 2.87 | 3.5  | 3.12 | 3.63 | 3.68 | 3.29  | 3.23  |
| 1.54 | 1.82 | 1.59 | 1.75 | 1.72 | 1.62 | 1.54 | 1.61  | 1.42  |
| 2.52 | 3.21 | 2.6  | 2.81 | 5.72 | 3.99 | 3.05 | 2.92  | 2.81  |
| 8.2  | 8.39 | 8.09 | 8    | 8.14 | 7.05 | 7.54 | 9.06  | 8.63  |
| 4.16 | 3.95 | 4.34 | 4.24 | 4.05 | 4.63 | 4.44 | 3.87  | 3.91  |
| 2.38 | 2.74 | 2.69 | 2.65 | 5.4  | 3.49 | 2.47 | 2.66  | 2.81  |
| 2.68 | 2.43 | 2.57 | 2.55 | 2.46 | 2.83 | 2.32 | 2.41  | 2.48  |
| 5.5  | 7.11 | 7.31 | 8.06 | 6.78 | 6.94 | 4.93 | 3.99  | 8.75  |
| 6.64 | 7.88 | 7.92 | 6.39 | 7.75 | 7.8  | 6.7  | 7.45  | 8.76  |
| 2.2  | 2.13 | 2.17 | 2.46 | 1.78 | 1.81 | 1.83 | 1.75  | 1.72  |
| 2.72 | 2.68 | 4.74 | 2.13 | 3.24 | 2.54 | 4.15 | 2.4   | 4.85  |
| 9.72 | 9.73 | 9.39 | 9.04 | 9.22 | 8.72 | 9.91 | 10.62 | 11.75 |
| 5.1  | 5.08 | 5.52 | 5.37 | 4.96 | 5.34 | 5.07 | 6.56  | 7.16  |
| 9.8  | 9.11 | 9.19 | 9.94 | 9.09 | 8.76 | 9.2  | 9.28  | 8.97  |
| 1.6  | 2.4  | 7.22 | 3.98 | 2.86 | 5.39 | 1.47 | 1.19  | 1.83  |
| 1.7  | 1.92 | 1.68 | 2    | 1.58 | 2.1  | 1.74 | 1.77  | 1.83  |
| 9.19 | 10.1 | 7.03 | 2.38 | 6.71 | 6.26 | 6.14 | 5.42  | 9.43  |
| 9.39 | 8.21 | 7.71 | 7.46 | 8.7  | 8.12 | 7.21 | 8.2   | 8.67  |
| 2.01 | 1.83 | 2.52 | 2.96 | 1.94 | 2.19 | 2.26 | 2.3   | 2.1   |
| 2.72 | 3.29 | 3.57 | 3.81 | 3.35 | 2.55 | 2.9  | 3.49  | 3.31  |
| 5.33 | 3.58 | 5.87 | 3.04 | 2.97 | 2.76 | 3.31 | 5.79  | 2.57  |
| 5.72 | 5.03 | 5.18 | 3.46 | 4.18 | 3.65 | 3.75 | 4.74  | 2.48  |
| 1.61 | 1.95 | 1.71 | 1.76 | 2    | 1.91 | 1.69 | 1.63  | 1.7   |
| 3.16 | 2.51 | 2.74 | 2.87 | 3.17 | 2.71 | 3.08 | 2.69  | 2.32  |
| 7.37 | 7.56 | 7.66 | 8.86 | 7.92 | 8.96 | 8.13 | 7.58  | 6.68  |
| 2.46 | 3.12 | 2.44 | 2.69 | 3.06 | 3.62 | 2    | 2.62  | 2.55  |
| 6.05 | 5.1  | 4.61 | 5.52 | 4.58 | 4.92 | 5.32 | 5.05  | 5.97  |
| 1.6  | 1.73 | 1.83 | 3.27 | 2.68 | 2.07 | 2.04 | 2.86  | 2.73  |

|      |      |       |      |      |      |      |      |      |
|------|------|-------|------|------|------|------|------|------|
| 4.24 | 3.05 | 6.38  | 7.6  | 3.45 | 5.1  | 3.48 | 3.53 | 4.39 |
| 2.15 | 1.52 | 2.67  | 3.17 | 1.98 | 3.01 | 2.03 | 1.42 | 1.52 |
| 2.2  | 3.23 | 3.09  | 1.56 | 3.84 | 2.32 | 2.14 | 2.49 | 2.74 |
| 2.13 | 2.37 | 2.14  | 3.44 | 2.23 | 2.94 | 3.61 | 2.34 | 2.34 |
| 1.9  | 1.76 | 1.8   | 2.22 | 2.06 | 1.86 | 1.75 | 2.77 | 2.27 |
| 2.02 | 1.86 | 2.09  | 1.92 | 2.04 | 2.19 | 2.02 | 2.04 | 1.86 |
| 2.93 | 3.12 | 4.24  | 5.72 | 4.82 | 3.13 | 3.82 | 3.02 | 4.87 |
| 2.18 | 2.79 | 2.31  | 2.43 | 2.36 | 1.95 | 2.6  | 2.4  | 2.27 |
| 5.39 | 5.62 | 5.4   | 6.36 | 5.63 | 6.27 | 5.78 | 5.72 | 5.86 |
| 2.01 | 1.86 | 2.48  | 3.58 | 2.52 | 2.64 | 2.36 | 1.55 | 2.42 |
| 7.02 | 7.52 | 7.62  | 6.11 | 7.46 | 6.09 | 7.32 | 7.65 | 7.11 |
| 1.43 | 1.24 | 1.54  | 1.77 | 1.81 | 1.48 | 1.65 | 1.44 | 1.56 |
| 4.09 | 3.38 | 6.13  | 5.8  | 3.22 | 6.53 | 3.41 | 2.55 | 4.77 |
| 8.54 | 9.18 | 6.84  | 4.99 | 5.34 | 7.22 | 7.01 | 7.17 | 9.39 |
| 7.26 | 7.18 | 7.21  | 6.38 | 7.28 | 6.88 | 6.76 | 6.4  | 6.72 |
| 5.32 | 6.34 | 7.59  | 4.76 | 6.31 | 5.58 | 4.76 | 3.87 | 4.45 |
| 5.72 | 5.13 | 8.94  | 4.97 | 8.43 | 3.83 | 5.86 | 6.93 | 6.77 |
| 8.75 | 9.81 | 6.1   | 3.71 | 6.75 | 6.39 | 6.67 | 5.86 | 9.6  |
| 3.18 | 2.31 | 2.49  | 2.09 | 1.91 | 4.09 | 1.62 | 3.49 | 4.19 |
| 2.02 | 1.41 | 4.38  | 1.85 | 1.58 | 1.9  | 2.27 | 8.3  | 2.28 |
| 9.65 | 9.45 | 10.28 | 9.32 | 9.29 | 9.17 | 9.17 | 9.39 | 9.34 |
| 7.57 | 6.9  | 7.88  | 5.48 | 6.2  | 6.42 | 5.66 | 6.15 | 6.79 |
| 6.71 | 6.05 | 7.84  | 6.91 | 6.06 | 6.48 | 6.04 | 6.44 | 5.68 |
| 3.39 | 2.23 | 2.35  | 2.69 | 3.86 | 3.04 | 3.21 | 2.68 | 2.81 |
| 6.04 | 6.69 | 7.42  | 6.58 | 5.74 | 6    | 5.27 | 2.43 | 6.07 |
| 3.03 | 2.67 | 3.26  | 3.44 | 3.26 | 2.93 | 3.07 | 3.18 | 2.77 |
| 6.33 | 6.7  | 4.83  | 6.24 | 6.48 | 6.33 | 6.37 | 6.09 | 6.29 |
| 1.74 | 1.72 | 1.56  | 1.64 | 1.69 | 1.59 | 1.97 | 2    | 1.83 |
| 7.45 | 7.52 | 7.42  | 7.22 | 6.42 | 6.71 | 6.57 | 6.32 | 7.46 |
| 6.09 | 5.73 | 4.92  | 4.03 | 4.82 | 4.25 | 4.31 | 3.12 | 5.52 |
| 3.46 | 5.04 | 5.12  | 5.06 | 5.06 | 4.57 | 4.53 | 4.67 | 5.29 |
| 4.15 | 4.29 | 4.58  | 4.25 | 4.61 | 4.87 | 4.94 | 4.76 | 4.17 |
| 2.36 | 1.99 | 1.96  | 2.43 | 3.02 | 2.64 | 2.19 | 2.89 | 2.27 |
| 4.74 | 4.3  | 3.81  | 5.04 | 4.25 | 4.37 | 4.53 | 4.12 | 4.37 |
| 6.66 | 6.24 | 6.85  | 6    | 6.06 | 7.27 | 6.56 | 7.6  | 7.04 |
| 1.91 | 5.04 | 2.47  | 3.19 | 2.17 | 4.24 | 2.4  | 1.62 | 1.83 |
| 4.09 | 4.47 | 4.48  | 4.24 | 3.98 | 4.41 | 4.26 | 4.1  | 4.4  |
| 7.69 | 7.39 | 7.01  | 6.71 | 7.25 | 6.97 | 7.39 | 8.15 | 7.93 |
| 2.98 | 3.22 | 4.4   | 3.32 | 3.43 | 3.97 | 3.59 | 3.48 | 4.25 |
| 2.01 | 1.95 | 2.45  | 2.89 | 2.15 | 2.74 | 2.44 | 2.36 | 2.71 |
| 2.35 | 1.97 | 2.13  | 2.21 | 2.2  | 2.03 | 2.08 | 2.13 | 2    |
| 1.93 | 2.08 | 1.88  | 2.42 | 2.12 | 2.14 | 2.14 | 2.25 | 2.19 |
| 4.34 | 5.29 | 4.67  | 4.01 | 5.73 | 4.46 | 4.52 | 5.14 | 5.69 |
| 5.42 | 4.19 | 4.06  | 5.23 | 3.85 | 5.64 | 5.14 | 3.92 | 4.52 |
| 2.57 | 2.17 | 1.82  | 1.86 | 1.76 | 1.74 | 1.86 | 1.99 | 1.89 |
| 8.78 | 4.05 | 3.48  | 2.44 | 3.97 | 2.69 | 9.12 | 8.65 | 7.38 |
| 3.12 | 3.11 | 3.45  | 3.28 | 3.02 | 3.17 | 3.25 | 3.09 | 3.34 |
| 3.68 | 5.08 | 2.95  | 3.94 | 2.72 | 2.95 | 2.68 | 2.31 | 3.11 |
| 7.56 | 7.25 | 6.72  | 6.05 | 7.18 | 5.89 | 7.31 | 6.71 | 7.26 |
| 4.99 | 4.37 | 5.21  | 4.32 | 3.97 | 4.47 | 3.65 | 2.52 | 3.34 |
| 2.22 | 1.88 | 2.28  | 2.21 | 1.82 | 2.01 | 2.08 | 2.29 | 2.41 |
| 1.73 | 1.92 | 2.33  | 2.26 | 2.3  | 2.43 | 2.45 | 2.35 | 2.29 |

|      |      |      |      |      |      |      |      |      |
|------|------|------|------|------|------|------|------|------|
| 2    | 1.8  | 2.02 | 2.38 | 2.01 | 1.95 | 1.98 | 2.05 | 2.12 |
| 1.45 | 1.87 | 1.51 | 1.44 | 1.36 | 1.71 | 1.8  | 1.53 | 1.54 |
| 2.38 | 2.29 | 2.45 | 2.52 | 2.56 | 2.74 | 2.34 | 2.45 | 2.14 |
| 7.36 | 8.15 | 8.24 | 7.92 | 7.68 | 6.8  | 6.76 | 7.78 | 7.92 |
| 2.67 | 3.32 | 4.22 | 2.63 | 2.68 | 3.79 | 2.61 | 2.34 | 4.1  |
| 7.81 | 7.73 | 7.36 | 6.14 | 7.88 | 7.27 | 7.95 | 7.44 | 8.21 |
| 3.07 | 3.35 | 3.3  | 3.44 | 3.15 | 3.61 | 2.71 | 3.03 | 2.77 |
| 2.65 | 2.73 | 4.59 | 4.1  | 2.54 | 4.33 | 2.64 | 5.7  | 3.49 |
| 8.74 | 8.24 | 8.26 | 7.26 | 9.07 | 8.75 | 9.37 | 9.29 | 9.54 |
| 4.73 | 2.88 | 2.45 | 1.79 | 2.44 | 1.6  | 1.76 | 1.51 | 1.68 |
| 1.81 | 1.74 | 2.22 | 1.86 | 2.14 | 2.21 | 1.92 | 2.33 | 1.83 |
| 2.18 | 2.53 | 2.2  | 2.26 | 2.26 | 2.75 | 2.11 | 2.29 | 2.17 |
| 2.28 | 1.89 | 1.91 | 1.98 | 2.52 | 2.46 | 1.93 | 2.46 | 2.12 |
| 7.44 | 6.78 | 7.52 | 5.82 | 6.22 | 5.88 | 6.34 | 5.94 | 5.87 |
| 2.01 | 2.14 | 2.03 | 3.33 | 2.52 | 2.19 | 2.26 | 2.21 | 2.35 |
| 3.47 | 3.72 | 3.71 | 2.83 | 3.19 | 2.82 | 4.6  | 3.7  | 2.67 |
| 6.1  | 4.23 | 7.14 | 5.22 | 6.43 | 7.64 | 4.4  | 7.22 | 6.54 |
| 1.64 | 1.68 | 1.75 | 1.73 | 1.62 | 1.72 | 1.57 | 1.84 | 1.53 |
| 2.1  | 3.02 | 3.17 | 3.11 | 3.61 | 2.65 | 3.36 | 3.43 | 2.72 |
| 1.3  | 3.44 | 1.69 | 1.49 | 1.47 | 1.83 | 1.54 | 1.94 | 1.3  |
| 1.74 | 1.84 | 1.79 | 2.27 | 2.1  | 2.53 | 2.22 | 2.01 | 2.21 |
| 1.82 | 2.1  | 2.24 | 2.18 | 2.41 | 1.82 | 3.22 | 1.92 | 1.57 |
| 6.42 | 5.39 | 4.74 | 4.39 | 4.75 | 6.59 | 8.02 | 5.23 | 6.86 |
| 2.12 | 2.27 | 2.8  | 3.01 | 2.51 | 4.37 | 2.24 | 2.67 | 2.63 |



| X280  | X309  | X310  | X311  | X313  | X349  | X406  | X407  | X408  |
|-------|-------|-------|-------|-------|-------|-------|-------|-------|
| 3     | 3     | 3     | 3     | 3     | 3     | 3     | 3     | 3     |
| 8.38  | 4.78  | 3.63  | 4.09  | 3.65  | 4.35  | 7.89  | 4.4   | 5.73  |
| 7.23  | 7.89  | 8.11  | 7.95  | 8.55  | 7.52  | 7.45  | 7.62  | 7.85  |
| 1.92  | 2.21  | 2.42  | 1.93  | 2.25  | 2.45  | 2.22  | 2.59  | 1.92  |
| 7.98  | 8.59  | 9.02  | 8.48  | 7.51  | 8.67  | 7.36  | 7.3   | 8.42  |
| 7.73  | 8.12  | 7.96  | 8.06  | 9.12  | 8.11  | 6.36  | 8.23  | 7.42  |
| 6.24  | 6.68  | 6.48  | 7.55  | 7.79  | 6.35  | 5.15  | 6.7   | 7.29  |
| 6.59  | 7.05  | 6.77  | 6.97  | 6.95  | 7.11  | 7.32  | 6.72  | 6.82  |
| 1.56  | 1.42  | 1.59  | 1.54  | 1.67  | 1.81  | 1.44  | 1.77  | 1.67  |
| 7.74  | 8.78  | 6.99  | 6.94  | 7.55  | 7.78  | 8.37  | 7.52  | 7.92  |
| 6.84  | 7.53  | 6.28  | 6.13  | 7.33  | 6.21  | 5.31  | 6.22  | 5.76  |
| 6.58  | 4.24  | 4.28  | 4.63  | 5.55  | 7.26  | 4.15  | 3.98  | 5.62  |
| 10.26 | 9.84  | 9.2   | 10.01 | 9.97  | 9.32  | 9.8   | 9.72  | 8.98  |
| 7.88  | 3.86  | 3.62  | 3.09  | 8.21  | 3.64  | 7.64  | 5.9   | 5.25  |
| 3.19  | 2.86  | 2.39  | 2.63  | 2.36  | 2.64  | 2.6   | 2.32  | 2.72  |
| 6.74  | 6.48  | 2.64  | 3.59  | 2.88  | 3.91  | 5.13  | 3.52  | 4.05  |
| 8.47  | 4.24  | 5.18  | 3.75  | 7.7   | 4.2   | 6.94  | 6.48  | 5.19  |
| 2.16  | 2.32  | 1.85  | 1.73  | 2.5   | 3.19  | 2.13  | 1.85  | 1.75  |
| 4.55  | 5.43  | 4.02  | 3.91  | 3.74  | 6.67  | 4.7   | 6.56  | 3.49  |
| 4.4   | 6.46  | 5.49  | 6.09  | 5.36  | 4.53  | 4.7   | 5.07  | 4.24  |
| 4.42  | 2.9   | 2.49  | 3.47  | 3.32  | 3.54  | 2.76  | 2.75  | 2.96  |
| 8.44  | 8.45  | 8.57  | 8.68  | 7.23  | 7.98  | 8.18  | 6.83  | 7.21  |
| 2.68  | 3.23  | 2.39  | 3.79  | 3.35  | 2.77  | 4.35  | 3.76  | 4.86  |
| 4.64  | 4.06  | 3.76  | 3.62  | 4.28  | 3.65  | 4.12  | 3.65  | 3.59  |
| 5.51  | 5.82  | 5.66  | 4.95  | 5.13  | 5.6   | 5.83  | 5.19  | 4.78  |
| 4.38  | 4.34  | 3.96  | 4.22  | 3.89  | 3.75  | 3.47  | 4.55  | 3.75  |
| 9.44  | 10.06 | 7.78  | 8.47  | 7.65  | 9.44  | 8.62  | 7.46  | 8.56  |
| 6.42  | 4.53  | 4.77  | 5.02  | 5.33  | 4.15  | 4.35  | 4.37  | 3.62  |
| 10.86 | 11.58 | 11.49 | 11.19 | 11.56 | 11.55 | 11.25 | 11.37 | 11.69 |
| 5.13  | 7.2   | 6.84  | 6.16  | 4.45  | 5.65  | 5.62  | 6.85  | 5.01  |
| 3.24  | 2.56  | 1.99  | 2.39  | 2.25  | 2.74  | 3.02  | 2.84  | 2.73  |
| 4.6   | 5.14  | 5.82  | 5.78  | 5.29  | 5.66  | 5.43  | 5.57  | 5.46  |
| 9.64  | 9.61  | 10.73 | 9.93  | 9.23  | 10.52 | 9.5   | 9.37  | 9.9   |
| 2.87  | 3.01  | 2.53  | 2.65  | 2.56  | 2.9   | 2.83  | 2.89  | 2.25  |
| 2.69  | 2.73  | 2.98  | 2.39  | 2.82  | 2.7   | 3.32  | 3.18  | 3.31  |
| 2.87  | 2.42  | 2.08  | 2.05  | 2.29  | 2.27  | 2.43  | 2.38  | 2.2   |
| 7.7   | 7.61  | 8.7   | 7.66  | 7.15  | 9.36  | 8     | 7.53  | 8.75  |
| 12.38 | 13    | 13.23 | 13.32 | 12.13 | 12.39 | 12.13 | 12.56 | 11.89 |
| 2.7   | 2.94  | 2.31  | 2.44  | 4.53  | 2.36  | 2.02  | 2.92  | 5.42  |
| 1.85  | 2.43  | 1.78  | 1.87  | 2.12  | 2.21  | 1.87  | 2.08  | 2.08  |
| 3.52  | 2.45  | 4.04  | 3.08  | 2.91  | 2.43  | 2.76  | 2.66  | 3.1   |
| 5.13  | 5.57  | 4.11  | 6.77  | 5.87  | 4.59  | 4.23  | 4.46  | 6.29  |
| 8     | 7.22  | 8.52  | 7.67  | 7.44  | 6.7   | 7.64  | 7.46  | 7.41  |
| 2.4   | 2.23  | 2.46  | 2.46  | 2.3   | 2.43  | 2.47  | 2.2   | 2.38  |
| 2.43  | 2.34  | 2.33  | 2.24  | 2.65  | 2.7   | 2.49  | 2.84  | 2.31  |
| 6.9   | 3.77  | 4.89  | 4.31  | 6.28  | 5.61  | 4.5   | 5.76  | 4.86  |
| 2.38  | 3.21  | 3.2   | 3.15  | 3.3   | 2.75  | 3.11  | 2.65  | 3.59  |
| 5.55  | 5.39  | 5.8   | 5.94  | 5.96  | 5.57  | 5.13  | 5.55  | 6     |
| 4.58  | 2.74  | 2.76  | 2.73  | 2.09  | 2.31  | 3.48  | 2.53  | 2.95  |
| 3.29  | 3.42  | 3.6   | 3.54  | 3.34  | 3.1   | 3.63  | 3.48  | 3.68  |
| 5.13  | 7.25  | 4.53  | 3.24  | 2.54  | 2.86  | 4.35  | 2.62  | 5.03  |

|       |       |       |       |       |      |      |       |      |
|-------|-------|-------|-------|-------|------|------|-------|------|
| 1.99  | 2.06  | 2.22  | 1.67  | 1.77  | 2.08 | 1.93 | 2.38  | 2.3  |
| 3.81  | 3.03  | 2.89  | 3.81  | 3.11  | 3.33 | 2.62 | 2.79  | 3.5  |
| 4.71  | 4.03  | 3.46  | 3.38  | 3.81  | 3.37 | 3.06 | 3.23  | 3.61 |
| 7.75  | 5.92  | 4.83  | 4.07  | 5.4   | 4.2  | 3.77 | 4.04  | 3.56 |
| 4.6   | 2.32  | 3.08  | 3.32  | 3.32  | 2.1  | 3.5  | 4.54  | 3.27 |
| 1.81  | 2.01  | 1.93  | 1.82  | 1.92  | 1.97 | 1.88 | 1.77  | 1.68 |
| 5.69  | 7.82  | 6.79  | 6.68  | 6.04  | 5.47 | 5.5  | 6.52  | 5.49 |
| 6.31  | 5.79  | 5.11  | 4.91  | 5.54  | 5.83 | 5.47 | 5.97  | 4.58 |
| 3.94  | 3.02  | 2.94  | 3.08  | 3.44  | 2.74 | 2.95 | 3     | 3.4  |
| 8.2   | 8.03  | 9.62  | 8.54  | 8.73  | 8.38 | 7.96 | 9.16  | 8.12 |
| 8.33  | 8.98  | 8.38  | 6.46  | 8.58  | 7.83 | 7.12 | 7.89  | 7.88 |
| 2.46  | 2.9   | 2.74  | 2.63  | 2.11  | 2.37 | 4.04 | 2.41  | 2.33 |
| 3.11  | 2.58  | 2.53  | 2.32  | 7.88  | 5.24 | 1.68 | 7.17  | 2.88 |
| 9.12  | 8.38  | 9.49  | 9.03  | 8.09  | 8.87 | 8.99 | 8.97  | 9.15 |
| 6.58  | 5.34  | 7.28  | 5.65  | 6.82  | 4.2  | 5.72 | 6.43  | 5.95 |
| 2.44  | 2.21  | 2.15  | 2.38  | 2.29  | 2.81 | 2.38 | 2.25  | 2.14 |
| 6.87  | 8.06  | 7.59  | 7.8   | 8.43  | 8.14 | 7    | 7.13  | 7.57 |
| 8.27  | 4.47  | 7.81  | 6.82  | 9.03  | 7.75 | 7.65 | 8.08  | 8.46 |
| 1.68  | 1.54  | 1.53  | 1.72  | 1.66  | 1.67 | 1.7  | 1.5   | 1.65 |
| 4.07  | 4.55  | 5.54  | 4.7   | 5.87  | 4.41 | 4.18 | 5.19  | 4.15 |
| 1.83  | 1.58  | 1.76  | 1.72  | 1.52  | 1.87 | 1.9  | 1.79  | 1.78 |
| 1.72  | 1.54  | 1.41  | 1.54  | 1.83  | 1.92 | 1.86 | 1.73  | 1.96 |
| 2.19  | 3.4   | 6.6   | 4.03  | 2.44  | 2.26 | 2.83 | 2.34  | 3.04 |
| 3.43  | 3.35  | 3.34  | 2.87  | 3.32  | 3.54 | 3.57 | 3.16  | 3.95 |
| 3.08  | 3.09  | 2.9   | 3.19  | 3.49  | 4.5  | 3.3  | 4.24  | 3.33 |
| 1.58  | 1.67  | 1.5   | 1.71  | 1.55  | 1.53 | 1.51 | 1.59  | 1.77 |
| 2.43  | 2.39  | 2.41  | 2.43  | 2.43  | 2.53 | 2.64 | 2.63  | 2.38 |
| 7.87  | 8.18  | 8.38  | 9.29  | 9.1   | 8.56 | 7.64 | 8.14  | 9.17 |
| 4.44  | 4.34  | 4.19  | 4.5   | 4.41  | 4.47 | 4.42 | 4.37  | 4.36 |
| 2.41  | 2.21  | 2.43  | 2.57  | 2.47  | 2.64 | 2.6  | 2.64  | 2.4  |
| 1.97  | 2.28  | 2.33  | 2.07  | 2.58  | 2.2  | 2.32 | 2.34  | 2.35 |
| 7.51  | 8.87  | 5.52  | 7.85  | 7.81  | 4.95 | 4.76 | 4.2   | 4.71 |
| 6.54  | 7.94  | 7.55  | 8.13  | 7.77  | 6.94 | 6.68 | 7.06  | 7.05 |
| 1.86  | 1.69  | 2.31  | 2.1   | 2.09  | 1.93 | 1.97 | 2.01  | 2.32 |
| 4.16  | 3.13  | 1.98  | 2.72  | 1.9   | 2.02 | 3.07 | 2.68  | 2.12 |
| 9.67  | 10.87 | 10.24 | 10.35 | 10.17 | 9.26 | 9.49 | 10.14 | 9.18 |
| 5.18  | 5.97  | 5.79  | 6.97  | 4.42  | 5.08 | 5.6  | 5.54  | 4.86 |
| 10.02 | 8.93  | 9.13  | 7.95  | 8.94  | 8    | 8.69 | 9     | 8.6  |
| 8.16  | 3.78  | 1.59  | 1.96  | 1.87  | 1.74 | 1.9  | 1.59  | 1.78 |
| 1.76  | 1.77  | 1.79  | 1.62  | 1.57  | 1.63 | 1.72 | 1.75  | 1.61 |
| 6.53  | 8.74  | 9.24  | 8     | 6.72  | 5.32 | 6.36 | 6.91  | 4.93 |
| 7.67  | 6.77  | 8.58  | 8.18  | 7.17  | 8.52 | 8.22 | 7.79  | 8.64 |
| 2.54  | 2.59  | 2.06  | 2.29  | 2.58  | 2.11 | 2    | 1.9   | 2.5  |
| 2.97  | 3.25  | 2.54  | 3.32  | 3.46  | 4.19 | 2.46 | 2.77  | 2.86 |
| 4.27  | 4.1   | 4.86  | 3.77  | 4.51  | 3.43 | 3.83 | 3.66  | 3.02 |
| 3.18  | 6.17  | 4.8   | 6.08  | 6.07  | 3.88 | 5.75 | 4.27  | 5.03 |
| 1.64  | 1.69  | 1.78  | 1.73  | 1.71  | 1.67 | 1.72 | 1.69  | 1.78 |
| 3.12  | 3.87  | 2.77  | 2.33  | 2.74  | 2.8  | 2.89 | 2.52  | 2.67 |
| 8.52  | 7.22  | 7.41  | 5.34  | 7.09  | 7.85 | 8.95 | 9.06  | 8.73 |
| 2.63  | 3.58  | 2.47  | 2.73  | 2.78  | 2.68 | 2.71 | 3.05  | 2.68 |
| 6.05  | 4.05  | 5.94  | 5.13  | 6.47  | 4.12 | 4.88 | 4.61  | 5.12 |
| 2.56  | 1.49  | 1.57  | 1.71  | 2.04  | 1.63 | 1.9  | 1.96  | 1.8  |

|      |      |       |      |       |       |      |      |      |
|------|------|-------|------|-------|-------|------|------|------|
| 3.42 | 4.34 | 3.57  | 3.37 | 2.97  | 2.78  | 2.82 | 3.38 | 3.32 |
| 1.72 | 2.07 | 1.48  | 1.83 | 3.09  | 2.56  | 2.11 | 1.77 | 2.1  |
| 2.21 | 3.34 | 6.17  | 3.15 | 2.36  | 1.74  | 2.32 | 2.28 | 2.55 |
| 2.29 | 2.17 | 1.96  | 2.36 | 2.27  | 2.37  | 2.68 | 2.41 | 2.53 |
| 1.93 | 1.78 | 1.36  | 1.65 | 1.46  | 1.42  | 1.57 | 1.67 | 1.72 |
| 2.33 | 2.13 | 1.65  | 1.83 | 1.87  | 2.11  | 2.28 | 1.95 | 2.32 |
| 4.35 | 3.14 | 2.03  | 2.61 | 2.72  | 3.89  | 2.36 | 2.49 | 2.17 |
| 2.36 | 2.62 | 2.21  | 2.58 | 2.06  | 1.85  | 2.57 | 2.6  | 2.26 |
| 5.26 | 5.73 | 4.13  | 5    | 6.12  | 5.94  | 4.66 | 5.02 | 5.43 |
| 1.99 | 2.25 | 2.16  | 2.07 | 2.27  | 2.12  | 2.11 | 2.03 | 1.98 |
| 6.94 | 7.75 | 8.97  | 8.45 | 7.1   | 7.68  | 7.13 | 7.74 | 6.58 |
| 1.45 | 1.71 | 1.51  | 1.33 | 1.38  | 1.52  | 1.71 | 1.61 | 1.47 |
| 3.26 | 4.94 | 3.19  | 3.38 | 2.8   | 2.97  | 2.78 | 2.43 | 3.43 |
| 6.26 | 7.78 | 8.82  | 6.99 | 6.4   | 4.3   | 5.91 | 7.16 | 5.13 |
| 7.09 | 7.28 | 7     | 7.02 | 7.07  | 7.11  | 6.57 | 6.56 | 7.42 |
| 6.1  | 7.02 | 5.4   | 3.87 | 5.01  | 6.35  | 4.97 | 5.18 | 5.03 |
| 8.34 | 3.42 | 6.95  | 7.16 | 3.23  | 5.02  | 6.96 | 6.27 | 5.63 |
| 6.06 | 8.01 | 9.17  | 7.15 | 4.75  | 5.49  | 5.6  | 7.05 | 4.72 |
| 2.69 | 2.96 | 2.46  | 2.44 | 3.19  | 2.45  | 2.22 | 3.59 | 2.74 |
| 6.74 | 1.74 | 4.34  | 2.31 | 1.85  | 1.75  | 4.38 | 4.03 | 2.88 |
| 9.36 | 9.81 | 10.15 | 9.95 | 10.01 | 10.51 | 9.81 | 9.39 | 9.67 |
| 6.21 | 6.84 | 6.59  | 6.26 | 7.11  | 6.8   | 6.41 | 5.47 | 6.15 |
| 6.41 | 6.64 | 6.62  | 6.07 | 7.2   | 6.92  | 6.41 | 6.18 | 5.6  |
| 3.08 | 1.74 | 2.01  | 2    | 2.51  | 1.97  | 2.08 | 3.02 | 2.29 |
| 5.58 | 5.52 | 6.4   | 6.07 | 6.11  | 4.76  | 4.88 | 4.47 | 3.98 |
| 2.98 | 3.14 | 2.96  | 3.15 | 2.91  | 2.95  | 3.16 | 2.91 | 3.12 |
| 5.77 | 6.37 | 5.41  | 6.12 | 5.18  | 6.49  | 5.78 | 6.83 | 6.36 |
| 1.47 | 1.76 | 1.59  | 1.43 | 1.82  | 1.7   | 1.9  | 1.77 | 1.61 |
| 6.74 | 7.78 | 7.85  | 7.51 | 7.67  | 6.42  | 6.82 | 6.48 | 8.5  |
| 4.75 | 5.66 | 5.58  | 5.74 | 6.37  | 5.44  | 5.04 | 5.38 | 5.08 |
| 3.96 | 5.58 | 5.13  | 5.21 | 3.95  | 5.6   | 4.72 | 4.82 | 4.85 |
| 4.74 | 4.43 | 3.83  | 3.86 | 4.15  | 4.34  | 3.99 | 4.32 | 4.42 |
| 2.21 | 2.12 | 2.46  | 2    | 1.92  | 2.18  | 2.31 | 1.88 | 2.15 |
| 4.72 | 3.75 | 4.04  | 3.86 | 3.88  | 4.33  | 3.86 | 3.92 | 4.44 |
| 6.78 | 4.86 | 7.14  | 7.18 | 7.07  | 6.83  | 6.99 | 6.88 | 7.57 |
| 2.31 | 2.49 | 2.31  | 2.66 | 2.11  | 2.16  | 2.54 | 2.1  | 3.01 |
| 4.21 | 4.36 | 4.25  | 4.45 | 4.03  | 4.47  | 4.24 | 4.13 | 5.48 |
| 7.48 | 7.78 | 7.87  | 8.61 | 8.64  | 7.46  | 7.49 | 7.72 | 8.42 |
| 3.55 | 3.65 | 3.59  | 3.39 | 4.25  | 3.41  | 3.69 | 3.4  | 3.45 |
| 2.44 | 1.96 | 1.79  | 2.26 | 2.64  | 2.72  | 2.8  | 2.78 | 2.58 |
| 2.12 | 2.24 | 2     | 2.21 | 2.18  | 2.1   | 2.09 | 2.43 | 2.34 |
| 1.93 | 2.05 | 1.52  | 2.28 | 1.78  | 1.9   | 1.99 | 2.34 | 2.37 |
| 4.81 | 4.36 | 5.79  | 4.39 | 4.18  | 5.24  | 5.06 | 5.55 | 4.47 |
| 5.87 | 3.2  | 4.12  | 3.88 | 4.27  | 3.82  | 3.44 | 3.66 | 4.54 |
| 1.87 | 2.12 | 1.79  | 1.88 | 1.96  | 2.34  | 2.31 | 2.32 | 1.98 |
| 9.56 | 6.35 | 8.74  | 8.45 | 9.63  | 8.71  | 8.44 | 8    | 7.83 |
| 3.57 | 3.16 | 3.13  | 3.1  | 3.19  | 3.61  | 3.36 | 3.22 | 3.14 |
| 3.38 | 2.2  | 2.29  | 2.99 | 2.54  | 2.63  | 2.3  | 2.13 | 2.22 |
| 6.03 | 7.2  | 6.96  | 8.15 | 8.47  | 7     | 7.18 | 7.04 | 7.07 |
| 4.13 | 3.52 | 3.85  | 3.33 | 4.12  | 3.98  | 4.06 | 4.24 | 4.52 |
| 2.63 | 1.78 | 1.77  | 2.32 | 2.06  | 2.1   | 2.21 | 2.39 | 2.06 |
| 2.39 | 2.38 | 2.13  | 2.12 | 1.68  | 1.82  | 1.78 | 2.25 | 2    |

|      |      |      |      |      |      |      |      |      |
|------|------|------|------|------|------|------|------|------|
| 2.37 | 1.73 | 1.83 | 2.15 | 2.12 | 2.11 | 1.91 | 2.13 | 2.3  |
| 1.45 | 1.41 | 1.45 | 1.47 | 1.23 | 1.37 | 1.57 | 1.47 | 1.51 |
| 2.39 | 1.93 | 2.1  | 1.99 | 2.23 | 2.55 | 2.26 | 2.33 | 2.37 |
| 7.42 | 8.65 | 8.15 | 9.31 | 8.99 | 7.37 | 7.26 | 7.34 | 8.03 |
| 3.38 | 2.95 | 2.48 | 2.63 | 3.13 | 2.29 | 2.58 | 2.5  | 2.64 |
| 8.05 | 7.04 | 8.55 | 7.37 | 7.27 | 6.68 | 7.28 | 7.21 | 7.17 |
| 3.39 | 3.16 | 3.29 | 2.85 | 2.95 | 3.28 | 3.32 | 3.23 | 3.34 |
| 2.83 | 3.37 | 4.29 | 5.37 | 3.55 | 3.22 | 2.76 | 3.85 | 4.68 |
| 9.18 | 8.82 | 9.81 | 9.3  | 9.05 | 8.55 | 9.33 | 9.15 | 9.14 |
| 1.93 | 2.01 | 2.44 | 2.2  | 1.98 | 1.9  | 2.06 | 1.87 | 2.32 |
| 1.78 | 1.66 | 1.35 | 1.62 | 1.86 | 1.87 | 1.76 | 1.88 | 1.69 |
| 2.16 | 3.03 | 2.31 | 2.23 | 2.91 | 2.02 | 2.45 | 2.33 | 2.53 |
| 2.23 | 1.84 | 1.7  | 1.66 | 1.73 | 1.83 | 1.99 | 2.05 | 1.8  |
| 6.18 | 7.72 | 6.56 | 7.4  | 7.33 | 4.57 | 6.31 | 4.89 | 7.08 |
| 2.68 | 2.06 | 1.83 | 1.98 | 2.57 | 2.16 | 1.76 | 1.87 | 1.97 |
| 3.33 | 3.62 | 4.18 | 3.76 | 4.53 | 4.53 | 4.38 | 4.32 | 4.88 |
| 6.57 | 5.68 | 7.35 | 5.47 | 5.17 | 8.46 | 6.64 | 7.34 | 4.69 |
| 1.44 | 1.32 | 1.29 | 1.73 | 1.48 | 1.6  | 1.64 | 1.7  | 1.6  |
| 3.42 | 3.47 | 2.99 | 3.33 | 2.91 | 3.62 | 3.1  | 3.65 | 3.28 |
| 1.91 | 1.38 | 1.52 | 1.6  | 1.53 | 1.34 | 1.24 | 1.51 | 1.35 |
| 2.28 | 1.71 | 1.65 | 2.06 | 1.9  | 1.81 | 1.97 | 2.03 | 2.02 |
| 2.16 | 1.6  | 1.66 | 1.29 | 1.62 | 1.4  | 1.67 | 1.71 | 1.54 |
| 7.25 | 7.21 | 6.05 | 6.67 | 7.34 | 3.55 | 6.52 | 6.41 | 5.91 |
| 2.63 | 3.1  | 2.53 | 2.69 | 3.16 | 2.49 | 2.52 | 2.62 | 2.5  |

| X412  | X416  | X417  | X439  | X440  | X443  | X444  | X445  | X451  |
|-------|-------|-------|-------|-------|-------|-------|-------|-------|
| 3     | 3     | 3     | 3     | 3     | 3     | 3     | 3     | 3     |
| 5.99  | 5.29  | 5.62  | 6.69  | 8.5   | 5.74  | 2.58  | 6.56  | 5.32  |
| 7.45  | 8.12  | 7.68  | 7.72  | 7.82  | 7.33  | 7.25  | 7.42  | 7.8   |
| 2.62  | 2.26  | 2.72  | 2.23  | 2.29  | 2.23  | 1.94  | 2.47  | 2.21  |
| 8.56  | 7.3   | 8.87  | 8.1   | 7.62  | 8.35  | 8.49  | 8.26  | 8.64  |
| 8.28  | 8.49  | 8.02  | 9.02  | 8.45  | 8.52  | 9.1   | 8.14  | 7.3   |
| 5.8   | 6.9   | 5.87  | 6.91  | 7.33  | 7.44  | 6.52  | 6.38  | 6.97  |
| 6.74  | 7.22  | 6.98  | 6.85  | 6.6   | 6.68  | 6.7   | 7.09  | 6.76  |
| 1.81  | 1.6   | 1.67  | 1.63  | 1.48  | 1.61  | 1.57  | 1.87  | 1.44  |
| 8.96  | 8.08  | 7.57  | 7.05  | 8.11  | 8.22  | 7.25  | 7.71  | 7.97  |
| 6.47  | 5.02  | 6.21  | 6.55  | 6.3   | 5.8   | 5.53  | 5.41  | 5.95  |
| 4.9   | 4.78  | 3.7   | 4.54  | 5.04  | 4.09  | 4.35  | 3.87  | 5.22  |
| 9.22  | 9.56  | 9.96  | 9.32  | 10.32 | 9.16  | 9.8   | 9.06  | 8.97  |
| 5.42  | 6.55  | 4.48  | 6.35  | 7.43  | 4.04  | 6.7   | 3.15  | 4.6   |
| 2.61  | 2.23  | 2.41  | 2.85  | 2.33  | 2.32  | 2.61  | 2.75  | 2.8   |
| 4.5   | 4.05  | 3.7   | 3.32  | 4.2   | 4.86  | 3.66  | 4.07  | 4.38  |
| 5.85  | 7.09  | 5.62  | 6.33  | 7.21  | 4.88  | 5.92  | 3.65  | 5.15  |
| 2.2   | 1.84  | 2.09  | 1.84  | 1.99  | 1.75  | 2.2   | 2     | 1.98  |
| 3.11  | 6.17  | 3.96  | 4.48  | 4.53  | 5.82  | 3.29  | 5.98  | 3.61  |
| 4.84  | 5.23  | 5.22  | 5.07  | 3.01  | 6     | 4.24  | 5.21  | 4.26  |
| 2.71  | 3.24  | 2.81  | 2.99  | 3.56  | 2.69  | 2.46  | 2.74  | 3.16  |
| 7.42  | 7.77  | 8.42  | 8.18  | 8.38  | 8.31  | 6.64  | 8.77  | 7.31  |
| 3.3   | 3.44  | 2.37  | 5.73  | 3.21  | 4.25  | 2.89  | 2.91  | 4.53  |
| 3.97  | 3.39  | 4.32  | 4.24  | 4.29  | 4.25  | 3.77  | 4.22  | 3.82  |
| 5.14  | 4.51  | 4.86  | 5.67  | 5.36  | 4.49  | 4.84  | 4.7   | 5.12  |
| 4.84  | 4.47  | 4.33  | 4.46  | 3.56  | 6.57  | 3.47  | 4.23  | 3.44  |
| 9.72  | 9.71  | 10.07 | 8.15  | 7.02  | 8.8   | 9.32  | 10.02 | 8.59  |
| 4.27  | 4.53  | 5.08  | 4.73  | 4.76  | 4.27  | 4.44  | 5.94  | 3.34  |
| 11.42 | 11.11 | 11.39 | 11.68 | 11.24 | 10.91 | 11.73 | 11.68 | 11.66 |
| 6.34  | 7.03  | 7.53  | 5.7   | 4.35  | 6.2   | 4.87  | 5.1   | 4.86  |
| 2.84  | 2.58  | 2.71  | 2.66  | 2.43  | 2.78  | 2.2   | 2.83  | 2.58  |
| 5.2   | 6.22  | 5.73  | 5.16  | 5.08  | 5.52  | 5.71  | 5.29  | 5.22  |
| 9.23  | 10.16 | 9.83  | 9.19  | 10.23 | 9.2   | 9.56  | 9.55  | 9.87  |
| 2.92  | 2.72  | 2.3   | 2.76  | 3.27  | 2.61  | 2.77  | 2.71  | 2.56  |
| 3.54  | 3.5   | 3.25  | 3.16  | 4.14  | 3.1   | 3.29  | 3.79  | 3.01  |
| 2.58  | 2.32  | 1.99  | 1.93  | 2.12  | 1.95  | 2.05  | 2.5   | 2.28  |
| 7.49  | 8.46  | 7.55  | 7.36  | 8.32  | 7.25  | 7.87  | 7.93  | 8.49  |
| 12.65 | 12.22 | 12.46 | 12.41 | 11.41 | 12.69 | 11.96 | 13.22 | 11.82 |
| 2.03  | 2.57  | 2.24  | 2.21  | 1.97  | 2.53  | 2.15  | 2.6   | 4.99  |
| 1.87  | 1.88  | 2.13  | 2.09  | 1.77  | 1.96  | 2.09  | 1.94  | 2.33  |
| 3.06  | 2.84  | 3.11  | 3.39  | 4.32  | 3.45  | 2.69  | 2.79  | 3.11  |
| 4.13  | 4.47  | 5.12  | 5.36  | 6.14  | 5.29  | 4.67  | 3.5   | 6.05  |
| 7.57  | 7.34  | 7.94  | 7.51  | 7.47  | 7.89  | 7     | 7.8   | 7.54  |
| 2.32  | 2.52  | 2.45  | 2.43  | 2.34  | 2.32  | 2.44  | 2.08  | 2.4   |
| 2.13  | 2.96  | 2.81  | 2.75  | 2.55  | 2.33  | 2.69  | 2.76  | 2.39  |
| 4.49  | 3.54  | 4.07  | 5.6   | 5.44  | 5.41  | 4.67  | 4.34  | 4.77  |
| 3.29  | 2.77  | 2.91  | 3.56  | 2.82  | 2.35  | 2.75  | 2.24  | 3.24  |
| 5.29  | 5.03  | 5.31  | 6.1   | 5.73  | 5.45  | 5.16  | 5.34  | 5.64  |
| 3.23  | 2.59  | 2.59  | 2.66  | 3.59  | 2.97  | 2.72  | 4.14  | 3.03  |
| 4.11  | 3.16  | 3.58  | 2.55  | 2.98  | 3.04  | 3.64  | 3.74  | 3.62  |
| 6.56  | 2.69  | 4.79  | 2.86  | 3.16  | 2.53  | 2.29  | 3.1   | 4.67  |

|       |      |      |      |      |       |      |       |      |
|-------|------|------|------|------|-------|------|-------|------|
| 2.5   | 1.87 | 2.05 | 2.3  | 2.55 | 2.19  | 2.03 | 1.71  | 1.92 |
| 3.1   | 3.72 | 2.81 | 3.82 | 3.17 | 2.84  | 3.03 | 3.54  | 3.28 |
| 3.73  | 3.8  | 3.55 | 3.72 | 3.25 | 3.25  | 4.88 | 3.28  | 3.69 |
| 7.11  | 3.5  | 5.71 | 3.57 | 3.39 | 2.72  | 4.09 | 4.06  | 4    |
| 4.63  | 3.9  | 3.72 | 4.92 | 4.9  | 4.33  | 3.73 | 3.76  | 3.3  |
| 1.71  | 1.91 | 1.67 | 1.71 | 1.96 | 1.81  | 2.1  | 1.84  | 1.85 |
| 5.84  | 4.86 | 4.76 | 5    | 4.82 | 6.21  | 5.08 | 7.13  | 5.16 |
| 5.68  | 5.89 | 5.58 | 5    | 5.62 | 5.33  | 4.95 | 6.19  | 4.72 |
| 2.99  | 3.16 | 3.06 | 3.14 | 3.6  | 3.68  | 3.54 | 3.03  | 3.61 |
| 7.81  | 8.2  | 7.91 | 8.26 | 7.74 | 8.27  | 8.46 | 8.4   | 8.1  |
| 8.61  | 7.58 | 7.95 | 8    | 7.13 | 8.13  | 6.9  | 8.4   | 7.95 |
| 2.18  | 4.89 | 3.19 | 1.99 | 2.28 | 2.19  | 1.99 | 2.86  | 2.24 |
| 3.1   | 7.13 | 2.51 | 1.65 | 1.87 | 2.3   | 5.64 | 2.37  | 2.81 |
| 8.94  | 8.92 | 8.94 | 8.63 | 9.36 | 8.48  | 9.28 | 9.28  | 9.15 |
| 5.95  | 4.42 | 5.81 | 5.97 | 5.59 | 6.19  | 5.95 | 6.01  | 5.49 |
| 2.4   | 2.51 | 2.22 | 2.58 | 2.35 | 2.21  | 2.41 | 2.45  | 2.53 |
| 7.26  | 7.95 | 6.2  | 7.74 | 7.07 | 7.49  | 7.71 | 6.62  | 7.52 |
| 6.35  | 7.51 | 4.77 | 6.81 | 7.63 | 5.96  | 8.36 | 6.53  | 8.52 |
| 2.08  | 1.62 | 1.6  | 1.65 | 1.51 | 1.67  | 1.49 | 1.63  | 1.74 |
| 4.68  | 5.33 | 4.31 | 5.14 | 4.36 | 4.69  | 3.83 | 4.31  | 4.11 |
| 1.71  | 1.7  | 1.85 | 1.8  | 1.79 | 2.02  | 1.84 | 1.69  | 1.92 |
| 1.66  | 1.85 | 1.83 | 1.71 | 1.53 | 1.69  | 1.83 | 1.38  | 1.72 |
| 4.27  | 2.08 | 3.07 | 3.58 | 2.22 | 2.55  | 2.39 | 3.12  | 3.09 |
| 3.22  | 3.36 | 3.38 | 3.22 | 3.65 | 3.08  | 3.12 | 3.11  | 3.54 |
| 3.42  | 3.91 | 3.24 | 3.22 | 3.03 | 3.06  | 3.61 | 3.43  | 3.33 |
| 1.46  | 1.5  | 1.87 | 1.5  | 1.78 | 1.67  | 1.62 | 1.65  | 1.57 |
| 2.37  | 2.62 | 2.53 | 2.52 | 2.92 | 2.73  | 2.4  | 2.74  | 2.87 |
| 7.47  | 8.35 | 7.79 | 8.6  | 8.99 | 8.57  | 8.35 | 7.74  | 9.02 |
| 4.32  | 4.4  | 4.66 | 4.77 | 4.65 | 4.3   | 4.67 | 4.54  | 4.67 |
| 2.56  | 2.53 | 2.71 | 2.47 | 2.99 | 2.33  | 2.64 | 2.53  | 2.7  |
| 2     | 2.27 | 2.29 | 2.58 | 2.36 | 2.15  | 1.94 | 2.32  | 2.59 |
| 7.14  | 4.02 | 6.26 | 6.44 | 5.33 | 5.89  | 4.74 | 7.06  | 5.12 |
| 8.04  | 7.06 | 7.42 | 7.88 | 7.2  | 7.66  | 7    | 8.09  | 7.26 |
| 1.96  | 1.93 | 1.86 | 2.01 | 1.99 | 1.92  | 2.01 | 2.03  | 1.92 |
| 3.99  | 2.21 | 2.66 | 2.32 | 3.38 | 2.33  | 2.15 | 2.15  | 2.11 |
| 10.06 | 9.2  | 8.8  | 9.4  | 9.03 | 10.13 | 8.86 | 10.52 | 9.23 |
| 5.32  | 5.23 | 4.97 | 5.65 | 5.46 | 5.88  | 5.13 | 6.23  | 4.84 |
| 8.82  | 9.29 | 8.62 | 8.7  | 9.36 | 8.83  | 8.84 | 8.57  | 8.8  |
| 6.86  | 1.55 | 2.23 | 2.08 | 1.52 | 2.03  | 1.4  | 1.82  | 1.88 |
| 1.62  | 1.57 | 1.98 | 1.8  | 1.84 | 1.84  | 1.8  | 1.63  | 1.78 |
| 7.52  | 5.76 | 7.74 | 4.7  | 4.75 | 7.35  | 5.66 | 7.98  | 4.83 |
| 8.25  | 8    | 7.71 | 8.06 | 8.78 | 7.56  | 8.2  | 8.58  | 8.56 |
| 2.08  | 1.92 | 1.89 | 2.05 | 1.89 | 2.26  | 2.28 | 2.13  | 2.22 |
| 3.06  | 3.78 | 3.32 | 3.02 | 4.34 | 3.21  | 3.09 | 2.88  | 2.72 |
| 3.63  | 2.94 | 3.16 | 3.45 | 3.13 | 3.35  | 3.58 | 3.46  | 3.25 |
| 5.02  | 4.68 | 3.39 | 5.45 | 5.85 | 3.67  | 5.54 | 4.24  | 4.64 |
| 1.62  | 1.63 | 1.72 | 1.6  | 1.72 | 1.68  | 1.67 | 1.76  | 1.82 |
| 2.5   | 2.46 | 2.97 | 2.58 | 2.71 | 2.24  | 2.06 | 2.31  | 2.51 |
| 8.46  | 8.92 | 8.83 | 9.16 | 9.72 | 8.7   | 8.39 | 8.58  | 8.8  |
| 3.09  | 2.57 | 2.01 | 2.53 | 3.89 | 2.8   | 2.83 | 2.92  | 2.83 |
| 4.76  | 4.81 | 4.26 | 5.19 | 4.07 | 4.93  | 4.59 | 4.51  | 4.87 |
| 1.76  | 1.92 | 1.8  | 2.21 | 1.89 | 1.77  | 2.08 | 1.71  | 1.75 |

|      |       |      |      |       |      |      |      |      |
|------|-------|------|------|-------|------|------|------|------|
| 3.92 | 3.41  | 3.26 | 3.92 | 3.69  | 3.28 | 4.19 | 3.14 | 3.33 |
| 1.73 | 1.98  | 1.96 | 2.29 | 2.33  | 1.6  | 2.21 | 2    | 1.94 |
| 3.64 | 1.99  | 2.5  | 3.78 | 1.95  | 2.38 | 1.99 | 2.46 | 2.74 |
| 2.21 | 2.53  | 2.14 | 1.99 | 2.33  | 2.34 | 2.55 | 2.17 | 2.43 |
| 1.69 | 1.47  | 1.75 | 1.72 | 1.57  | 1.49 | 1.58 | 1.93 | 1.62 |
| 2.31 | 2.22  | 2.18 | 2.18 | 2.28  | 2.34 | 1.9  | 2.07 | 2.03 |
| 3.92 | 3.42  | 3.77 | 2.42 | 2.12  | 2.34 | 3.98 | 3.62 | 2.5  |
| 2.56 | 2.42  | 2.57 | 2.23 | 2.19  | 2.15 | 2.01 | 2.37 | 2.52 |
| 5.02 | 5.84  | 4.58 | 5.25 | 5.37  | 5.48 | 4.88 | 5.1  | 5.09 |
| 2.42 | 1.82  | 2.33 | 1.89 | 2.22  | 1.94 | 1.94 | 1.69 | 1.95 |
| 7.19 | 7.07  | 7.31 | 7.88 | 7.1   | 7.15 | 7.52 | 7.76 | 6.77 |
| 1.68 | 1.37  | 1.72 | 1.64 | 1.55  | 1.53 | 1.39 | 1.47 | 1.49 |
| 3.86 | 2.94  | 3.7  | 3.04 | 2.77  | 2.95 | 2.48 | 3.23 | 2.75 |
| 7.3  | 5.49  | 7.74 | 4.27 | 5.24  | 7.73 | 4.75 | 7.74 | 4.88 |
| 6.53 | 7.06  | 6.42 | 6.85 | 7.37  | 5.61 | 6.9  | 6.66 | 7.36 |
| 7.38 | 4.1   | 7.17 | 5.28 | 4.67  | 3.92 | 5.01 | 5.65 | 4.61 |
| 8.35 | 9     | 8.48 | 5.75 | 8.08  | 7.27 | 7.71 | 7.06 | 5.25 |
| 7.33 | 5.82  | 8.18 | 4.63 | 4.75  | 7.48 | 5.66 | 8.28 | 4.82 |
| 3.06 | 3.09  | 1.92 | 2.4  | 2.24  | 5.25 | 2.29 | 5.64 | 2.43 |
| 2.75 | 6.26  | 1.61 | 2.16 | 1.56  | 1.89 | 5.6  | 2.53 | 2.51 |
| 9.66 | 10.13 | 9.67 | 9.69 | 10.01 | 9.91 | 9.99 | 9.95 | 9.74 |
| 6.93 | 6.13  | 6.44 | 6.24 | 6.7   | 5.93 | 6.35 | 4.9  | 6.04 |
| 6.73 | 6.27  | 6.85 | 7.07 | 6.61  | 6.13 | 5.34 | 6.16 | 5.49 |
| 2.33 | 2.04  | 2.33 | 2.95 | 2.17  | 2.28 | 2.42 | 2.57 | 2.16 |
| 5.18 | 5.68  | 6.14 | 5.53 | 6.41  | 4.85 | 4.88 | 5.34 | 3.78 |
| 3.34 | 3.15  | 3.21 | 3    | 3.42  | 3.06 | 3.13 | 3.23 | 3.12 |
| 5.71 | 6.95  | 5.27 | 5.65 | 6.32  | 5.8  | 6.26 | 5.99 | 5.73 |
| 1.78 | 1.64  | 1.64 | 1.89 | 1.69  | 1.69 | 1.84 | 1.81 | 1.86 |
| 6.92 | 6.24  | 6.97 | 7.42 | 5.5   | 7.36 | 5.67 | 7.12 | 8.51 |
| 4.93 | 4.12  | 5.1  | 4.51 | 5.23  | 5.49 | 5    | 4.52 | 4.72 |
| 5.04 | 5.18  | 5.38 | 5.28 | 4.1   | 5.33 | 4.73 | 5.6  | 4.97 |
| 4.07 | 3.9   | 4.53 | 4.72 | 3.99  | 4.1  | 3.96 | 3.89 | 4.39 |
| 1.91 | 2.27  | 2.37 | 2.38 | 2.38  | 2.4  | 2.35 | 2.21 | 2.08 |
| 3.73 | 3.49  | 3.82 | 4.54 | 4.21  | 3.89 | 4.21 | 3.23 | 4.17 |
| 6.69 | 7.28  | 5.92 | 6.46 | 7.67  | 6.51 | 6.75 | 6.93 | 7.57 |
| 2.29 | 2.77  | 1.92 | 2.14 | 2.23  | 2.08 | 1.85 | 2.65 | 3.62 |
| 4.47 | 5.05  | 4.88 | 4.06 | 5.41  | 4.29 | 4.03 | 4.67 | 4.77 |
| 7.05 | 7.55  | 7.18 | 8.3  | 8.57  | 7.06 | 7.8  | 6.61 | 8.55 |
| 3.5  | 3.8   | 3.35 | 3.88 | 3.34  | 3.69 | 3.59 | 3.72 | 3.37 |
| 2.47 | 2.12  | 2.41 | 2.21 | 2.64  | 2.35 | 2.89 | 2.19 | 2.73 |
| 2.05 | 2.15  | 2.13 | 2.16 | 2.56  | 2.36 | 2.13 | 2.2  | 2.24 |
| 1.86 | 2.04  | 2.07 | 2.05 | 2.18  | 1.95 | 2.18 | 2.11 | 2.17 |
| 5.25 | 5.36  | 6.05 | 5.02 | 4.85  | 5.82 | 4.73 | 6.66 | 4.69 |
| 3.47 | 3.51  | 3.8  | 4.34 | 3.92  | 3.77 | 3.22 | 3.37 | 4.33 |
| 1.96 | 2.33  | 1.9  | 2.08 | 1.81  | 2.06 | 2.01 | 2.11 | 2.13 |
| 6.72 | 8.53  | 5.35 | 8.16 | 7.44  | 7.34 | 8.99 | 6.1  | 7.78 |
| 3.73 | 3.22  | 3.29 | 3.35 | 3.36  | 3.25 | 3.17 | 3.57 | 3.5  |
| 2.55 | 2.27  | 2.3  | 2.75 | 2.55  | 2.34 | 2.28 | 2.64 | 2.48 |
| 6.7  | 7.39  | 7.06 | 7.52 | 7.97  | 7.19 | 7.86 | 7.51 | 7.24 |
| 4.29 | 4.63  | 4.19 | 4.22 | 3.17  | 4.59 | 3.63 | 4.97 | 3.99 |
| 2.15 | 2.88  | 2.28 | 1.98 | 2.48  | 2.02 | 2.66 | 2.29 | 2.04 |
| 2.11 | 2.37  | 2.02 | 2.17 | 2.05  | 2.49 | 1.83 | 2.13 | 1.79 |

|      |      |      |      |      |      |      |      |      |
|------|------|------|------|------|------|------|------|------|
| 2.06 | 2.34 | 1.88 | 2.17 | 2.09 | 1.84 | 1.99 | 2.17 | 2.39 |
| 1.69 | 1.75 | 1.6  | 1.51 | 1.59 | 1.64 | 1.62 | 1.55 | 1.55 |
| 2.44 | 2.34 | 2.47 | 2.18 | 2.12 | 2.34 | 2.49 | 2.16 | 2.29 |
| 6.96 | 8.2  | 6.9  | 8.11 | 7.88 | 7.05 | 7.42 | 6.6  | 8.1  |
| 2.92 | 2.38 | 2.9  | 2.17 | 2.47 | 2.62 | 2.53 | 2.44 | 2.71 |
| 7.11 | 6.98 | 7.68 | 7.19 | 7.08 | 7.33 | 7.23 | 7.38 | 7.26 |
| 3.35 | 3.45 | 3.66 | 3.57 | 3.76 | 3.75 | 3    | 3.14 | 3.18 |
| 2.7  | 4.56 | 3.56 | 3.11 | 6.15 | 3.06 | 3.31 | 2.78 | 4.24 |
| 9.19 | 9.1  | 9.61 | 8.93 | 9.61 | 9.14 | 9.2  | 8.88 | 9.07 |
| 1.93 | 1.94 | 2.23 | 2.49 | 1.7  | 2.1  | 2.03 | 1.85 | 2.19 |
| 1.83 | 1.72 | 1.81 | 1.81 | 1.74 | 1.69 | 1.81 | 1.85 | 1.7  |
| 1.93 | 2.15 | 2.02 | 2.31 | 2.5  | 2.45 | 2.29 | 2.12 | 2.2  |
| 1.74 | 2.16 | 1.65 | 1.92 | 1.84 | 1.82 | 1.96 | 1.95 | 1.84 |
| 6.3  | 5.39 | 5.82 | 6.46 | 5.59 | 5.89 | 6.2  | 6.43 | 6.77 |
| 1.92 | 1.87 | 1.85 | 2.14 | 1.65 | 1.79 | 1.94 | 2.03 | 1.79 |
| 3.82 | 4.97 | 3.61 | 5.24 | 3.69 | 4.84 | 4.95 | 4.86 | 4.53 |
| 6.77 | 6.19 | 8.26 | 7.23 | 5.61 | 7.21 | 5.91 | 8.48 | 4.34 |
| 1.54 | 1.78 | 1.51 | 1.75 | 1.59 | 1.77 | 1.73 | 1.6  | 1.67 |
| 3.25 | 3.3  | 3.05 | 3.47 | 3.35 | 3.57 | 3.33 | 3.22 | 3.39 |
| 1.63 | 1.7  | 1.35 | 1.6  | 1.64 | 1.39 | 1.52 | 1.45 | 1.42 |
| 1.93 | 2.28 | 1.87 | 2.19 | 2.28 | 2    | 1.92 | 2.17 | 2.44 |
| 2.05 | 1.79 | 2    | 1.56 | 1.69 | 1.49 | 1.48 | 1.85 | 1.39 |
| 5.88 | 3.71 | 5.48 | 7.46 | 3.81 | 6.4  | 3.35 | 6.68 | 6.01 |
| 2.51 | 2.57 | 2.19 | 2.59 | 2.42 | 2.23 | 2.58 | 2.79 | 2.65 |



| X281  | X282  | X283  | X284  | X285  | X286  | X332  | X334  | X338  |
|-------|-------|-------|-------|-------|-------|-------|-------|-------|
| 4     | 4     | 4     | 4     | 4     | 4     | 4     | 4     | 4     |
| 7.75  | 1.79  | 5.76  | 3.86  | 2.87  | 0.97  | 2.18  | 2.32  | 4.06  |
| 7.91  | 7.44  | 7.91  | 7.2   | 7.55  | 7.13  | 7.17  | 7.08  | 8.09  |
| 1.92  | 2.54  | 1.75  | 1.89  | 2.21  | 2.73  | 2.04  | 2.33  | 1.92  |
| 8.51  | 7.62  | 7.46  | 6.89  | 7.06  | 6.08  | 6.23  | 5.68  | 8.74  |
| 7.2   | 8.83  | 9.2   | 6.23  | 7.31  | 6.67  | 6.62  | 5.27  | 5.75  |
| 5.69  | 6.18  | 4.46  | 4.91  | 5.4   | 3.08  | 5.68  | 4.9   | 7.39  |
| 7.12  | 6.93  | 7.04  | 6.94  | 7.06  | 7.26  | 7.55  | 7.63  | 7.72  |
| 1.33  | 1.35  | 1.47  | 1.67  | 2.85  | 1.85  | 1.49  | 1.7   | 2.03  |
| 8.46  | 9.43  | 7.36  | 6.56  | 6.4   | 8.09  | 7.48  | 7.64  | 7     |
| 6.27  | 5.03  | 5.87  | 5.19  | 5.54  | 5.36  | 5.63  | 4.76  | 6.37  |
| 5.32  | 5.16  | 5.71  | 4.45  | 4.67  | 4.54  | 4.48  | 4.34  | 2.89  |
| 10.58 | 10.14 | 7.75  | 8.66  | 8.35  | 6.36  | 9.73  | 10.2  | 8.32  |
| 2.03  | 5.83  | 4.67  | 3.02  | 2.95  | 3.37  | 5.24  | 3.31  | 4.88  |
| 3.74  | 3.29  | 3.3   | 2.57  | 2.3   | 2.92  | 2.32  | 2.1   | 3.15  |
| 7.34  | 7.41  | 5.07  | 4.18  | 4.11  | 6.1   | 3.12  | 4.1   | 3.81  |
| 2.28  | 5.5   | 4.89  | 2.5   | 4     | 3.89  | 6.05  | 4.8   | 5.99  |
| 2.2   | 1.4   | 1.42  | 1.37  | 1.8   | 1.49  | 1.81  | 1.88  | 2.14  |
| 6.53  | 3.52  | 4.48  | 3.27  | 3.17  | 4.33  | 4.25  | 3.28  | 6.46  |
| 4.06  | 4.69  | 3.76  | 4.98  | 6.54  | 5.42  | 4.98  | 4.93  | 3.91  |
| 2.79  | 2.23  | 2.72  | 3.54  | 2.64  | 4.03  | 2.97  | 2.89  | 3.04  |
| 7.84  | 6.16  | 7.94  | 6.63  | 4.64  | 7.53  | 5.01  | 7.25  | 7.37  |
| 2.24  | 5.53  | 3.39  | 2.33  | 2.29  | 2.74  | 4.08  | 3.33  | 2.55  |
| 5.16  | 3.37  | 4.16  | 3.71  | 2.95  | 3.71  | 3.01  | 2.77  | 3.16  |
| 6.01  | 5.12  | 4.42  | 6.68  | 6.47  | 7.36  | 5.94  | 6.11  | 4.55  |
| 3.36  | 4.36  | 4.03  | 3.68  | 5.85  | 7.93  | 3.69  | 4.44  | 4.74  |
| 10.2  | 10.22 | 9.96  | 7.25  | 10.95 | 9.07  | 9.17  | 8.91  | 9.65  |
| 5     | 4.44  | 4.69  | 4.29  | 5.72  | 3.95  | 4.18  | 4.09  | 4.19  |
| 11.83 | 11.76 | 10.92 | 11.53 | 12.46 | 12.01 | 11.69 | 11.69 | 12.6  |
| 6.8   | 4.89  | 5.84  | 6.57  | 6.47  | 5.37  | 4.58  | 5.6   | 5.44  |
| 3.41  | 3.19  | 2.14  | 2.94  | 3.8   | 3.28  | 2.95  | 2.52  | 4.14  |
| 4.28  | 5.36  | 5.07  | 5.04  | 4.43  | 6.4   | 4.3   | 4.35  | 4.49  |
| 9.29  | 9.23  | 8.91  | 9.87  | 9.61  | 8.13  | 9.78  | 8.13  | 10.65 |
| 3.63  | 2.9   | 2.61  | 2.48  | 2.29  | 2.58  | 2.58  | 2.39  | 2.04  |
| 3.23  | 2.32  | 2.7   | 2.38  | 2.14  | 2.44  | 2.53  | 2.55  | 2.57  |
| 3.49  | 2.13  | 2.5   | 2.88  | 4.45  | 2.09  | 2.65  | 2.25  | 3.87  |
| 7.64  | 7.02  | 6.74  | 7.81  | 7.52  | 5.2   | 8.52  | 6.06  | 8.88  |
| 10.52 | 10.88 | 10.95 | 11.58 | 11.73 | 13.59 | 11.65 | 11.89 | 10.52 |
| 2.87  | 2.02  | 3.18  | 2.32  | 2     | 2.21  | 2.19  | 2.16  | 3.02  |
| 2.08  | 1.76  | 2.51  | 2.06  | 2.13  | 2.14  | 2.22  | 2.75  | 1.84  |
| 2.18  | 3.13  | 1.9   | 2.65  | 2.27  | 2.54  | 2.49  | 2.87  | 2.44  |
| 2.94  | 4.82  | 5.32  | 6.87  | 4.96  | 3.82  | 4.61  | 3.85  | 6.05  |
| 8.34  | 7.65  | 8.08  | 8.34  | 8.63  | 9.52  | 7.56  | 7.86  | 6.58  |
| 2.14  | 2.23  | 2.21  | 2.4   | 2.31  | 1.99  | 2.53  | 2.26  | 2.29  |
| 2.09  | 2.84  | 2.62  | 2.8   | 2.6   | 2.76  | 3.11  | 2.32  | 2.77  |
| 4.03  | 5.6   | 3.77  | 5.81  | 4.72  | 5.13  | 4.32  | 4.1   | 4.68  |
| 2.65  | 2.32  | 2.44  | 3     | 3.59  | 2.35  | 3.03  | 3.27  | 2.99  |
| 5.79  | 5.81  | 5.37  | 5.66  | 5.26  | 5.08  | 5.17  | 4.86  | 6.81  |
| 2.9   | 2.04  | 2.83  | 3.34  | 2.74  | 2.57  | 2.76  | 3.17  | 2.24  |
| 3.78  | 3.6   | 3.54  | 3.87  | 4.23  | 3.23  | 2.71  | 2.71  | 3.74  |
| 7.84  | 3.63  | 9.17  | 6.82  | 1.51  | 6.37  | 2.6   | 2.16  | 7.22  |

|      |      |       |      |       |       |      |      |       |
|------|------|-------|------|-------|-------|------|------|-------|
| 2.14 | 2.62 | 1.89  | 2.27 | 1.67  | 1.81  | 1.81 | 2.11 | 2.09  |
| 3.81 | 2.76 | 3.6   | 3.4  | 2.93  | 1.94  | 2.91 | 3.5  | 6.55  |
| 6.69 | 4.68 | 7.25  | 2.28 | 4.02  | 5.12  | 3.36 | 3.7  | 5.74  |
| 5.27 | 6.77 | 4.06  | 5.65 | 5.17  | 4.18  | 4.11 | 3.35 | 7.57  |
| 4.69 | 3.86 | 4.69  | 5.04 | 3.09  | 2.14  | 4.01 | 4.16 | 5.53  |
| 1.9  | 1.64 | 1.87  | 1.79 | 1.58  | 1.74  | 1.95 | 1.88 | 1.75  |
| 6.31 | 6.66 | 6.35  | 5.81 | 6.75  | 7.06  | 5.78 | 5.72 | 6.71  |
| 7.21 | 5.83 | 5.37  | 5.42 | 5.09  | 6.32  | 4.89 | 4.4  | 5.32  |
| 3.68 | 4.71 | 4.71  | 3.12 | 3.62  | 3.69  | 3.31 | 3.38 | 3.27  |
| 7.41 | 9.03 | 8.86  | 8.72 | 8.92  | 8.29  | 7.66 | 8.39 | 8.99  |
| 8.47 | 9.06 | 7.28  | 7.7  | 7.96  | 7.36  | 6.89 | 6.48 | 9.3   |
| 2.28 | 5.51 | 2.67  | 6.07 | 7.56  | 8.43  | 4.4  | 3.27 | 2.05  |
| 1.19 | 6.9  | 1.35  | 2.52 | 8.83  | 2.75  | 5.62 | 6.99 | 2.99  |
| 8.7  | 9.07 | 9.71  | 8.58 | 7.94  | 8.26  | 9.06 | 8.73 | 6.13  |
| 5.33 | 5.73 | 4.43  | 6.3  | 5.17  | 7.17  | 5.47 | 4.61 | 5.74  |
| 2.5  | 2.64 | 2.42  | 2.38 | 2.11  | 2.28  | 2.41 | 2.66 | 2.33  |
| 6.93 | 3.68 | 7.3   | 7.5  | 6.96  | 6.23  | 7.58 | 7.4  | 7.4   |
| 5.53 | 7.37 | 6.1   | 7.65 | 7.59  | 9.06  | 8.03 | 7.13 | 3.44  |
| 1.74 | 1.82 | 1.99  | 1.7  | 1.7   | 1.58  | 1.92 | 1.6  | 2.04  |
| 4.45 | 3.3  | 5.72  | 3.76 | 5.01  | 3     | 4.11 | 3.77 | 4.77  |
| 1.7  | 1.88 | 1.74  | 1.66 | 1.77  | 1.75  | 1.85 | 1.91 | 1.79  |
| 1.77 | 1.78 | 1.71  | 1.59 | 1.72  | 1.63  | 1.86 | 1.78 | 1.6   |
| 2.07 | 2.29 | 2.55  | 4.78 | 3.03  | 2.96  | 2.25 | 2.59 | 1.78  |
| 3.32 | 3.72 | 4.15  | 5.18 | 4.03  | 2.94  | 4.08 | 5.42 | 5.25  |
| 4.94 | 4.09 | 3.85  | 3.48 | 2.93  | 3.29  | 3.46 | 3.84 | 3.4   |
| 1.58 | 1.56 | 1.6   | 1.62 | 1.96  | 1.58  | 1.86 | 1.58 | 1.5   |
| 2.85 | 2.76 | 3.34  | 2.6  | 2.54  | 2.8   | 2.7  | 2.59 | 2.36  |
| 7.72 | 8.91 | 8.03  | 7.33 | 7.25  | 8.01  | 8.17 | 7.72 | 8.55  |
| 4.53 | 4.3  | 4.08  | 3.88 | 4.03  | 4.16  | 4.28 | 4.18 | 4.17  |
| 2.25 | 2.22 | 3.41  | 2.5  | 2.34  | 2.79  | 2.52 | 2.56 | 2.38  |
| 2.54 | 2.05 | 2.32  | 2.99 | 2.13  | 3.13  | 2.48 | 2.57 | 1.91  |
| 7.24 | 8.63 | 9.79  | 5.93 | 6.12  | 5.01  | 4.51 | 3.09 | 10.39 |
| 7.14 | 6.62 | 9.54  | 6.04 | 6.89  | 7.4   | 5.14 | 6.2  | 7.7   |
| 2.3  | 1.76 | 1.72  | 1.66 | 1.98  | 2.01  | 1.84 | 1.77 | 1.85  |
| 2.4  | 2.73 | 4.17  | 3.15 | 4.71  | 2.27  | 2.71 | 2.45 | 2.28  |
| 9.37 | 9.96 | 10.64 | 9.76 | 10.42 | 11.26 | 9.39 | 9.89 | 10.98 |
| 4.61 | 4.84 | 4.88  | 5.12 | 5.26  | 8.25  | 5.2  | 5.67 | 5.11  |
| 9.92 | 9.53 | 9.71  | 9.11 | 9.18  | 9.27  | 8.64 | 9.09 | 8.93  |
| 9.81 | 2.66 | 7.93  | 2.01 | 1.41  | 1.53  | 1.57 | 1.74 | 7.46  |
| 1.86 | 1.26 | 1.79  | 1.65 | 1.69  | 1.62  | 1.64 | 1.67 | 1.62  |
| 4.93 | 4.58 | 5.06  | 7.62 | 8.08  | 8.04  | 5.46 | 5.36 | 5.95  |
| 7.31 | 8.91 | 7.02  | 7.92 | 8.43  | 8.86  | 7.65 | 8.35 | 7.76  |
| 3.76 | 2.51 | 2.18  | 2.06 | 2.35  | 2.06  | 2.11 | 2.06 | 2.37  |
| 2.54 | 3.04 | 3.36  | 2.71 | 2.68  | 2.68  | 2.68 | 2.45 | 3.99  |
| 5.95 | 4.04 | 3.97  | 6.7  | 4.49  | 4.67  | 4.84 | 4.62 | 5.07  |
| 5.61 | 3.97 | 5.21  | 3.23 | 3.42  | 5.37  | 4.09 | 3.36 | 6.12  |
| 1.87 | 1.6  | 1.74  | 1.99 | 1.62  | 1.74  | 1.57 | 1.87 | 1.86  |
| 3.89 | 2.45 | 2.66  | 3.34 | 2.91  | 3.32  | 3.2  | 2.52 | 3.26  |
| 8.78 | 7.36 | 7.98  | 7.74 | 8.59  | 7.33  | 8.9  | 6.87 | 7.31  |
| 2.59 | 4.34 | 2.64  | 3.08 | 2.4   | 3.59  | 2.66 | 2.23 | 2.25  |
| 5.69 | 4.8  | 5.31  | 5.38 | 6.21  | 5.53  | 3.65 | 4.34 | 5.4   |
| 2.1  | 1.81 | 1.82  | 2.86 | 2.11  | 2.38  | 1.73 | 1.54 | 1.23  |

|      |      |      |      |      |      |      |      |       |
|------|------|------|------|------|------|------|------|-------|
| 7.11 | 3.47 | 4.35 | 5.3  | 2.99 | 2.17 | 4.01 | 3.82 | 3.98  |
| 2.24 | 2.11 | 2.7  | 2.51 | 2.6  | 3.33 | 2.27 | 2.17 | 3.02  |
| 1.69 | 1.76 | 4.79 | 4.56 | 3.25 | 2.4  | 2.02 | 2.18 | 1.99  |
| 2.21 | 4.65 | 2.99 | 2.58 | 1.87 | 4.14 | 2.36 | 2.69 | 1.97  |
| 1.88 | 2.17 | 1.6  | 1.96 | 1.76 | 5.21 | 1.65 | 2.04 | 1.58  |
| 1.91 | 2.11 | 2.06 | 1.74 | 1.85 | 2.55 | 2.23 | 2.03 | 2.02  |
| 6.15 | 4.88 | 4.8  | 2.1  | 6.78 | 3.47 | 3.61 | 3.43 | 2.87  |
| 2.26 | 2.01 | 2.71 | 2.36 | 2.62 | 3.54 | 3.19 | 2.42 | 1.75  |
| 5.7  | 6.83 | 5.75 | 4.59 | 5.17 | 6.12 | 5.31 | 4.67 | 4.74  |
| 3.73 | 2.26 | 3.44 | 2.26 | 2.67 | 2.19 | 2.19 | 2.11 | 3.09  |
| 7.47 | 5.42 | 6.84 | 7.23 | 7.06 | 8.62 | 7.27 | 7.42 | 4.37  |
| 1.39 | 1.45 | 2.66 | 1.53 | 1.39 | 1.56 | 1.65 | 1.65 | 1.4   |
| 6.07 | 4.28 | 4.04 | 3.1  | 3.14 | 3.26 | 2.27 | 2.17 | 8.05  |
| 4.82 | 4    | 5.73 | 7.9  | 8.48 | 8.3  | 5.93 | 4.67 | 6.37  |
| 6.88 | 6.86 | 6.65 | 7.41 | 6.07 | 5.95 | 6.28 | 5.85 | 6.99  |
| 5.5  | 7.3  | 3.62 | 5.57 | 5.45 | 4.83 | 5.15 | 3.95 | 6.17  |
| 8.97 | 5.44 | 6.72 | 6.42 | 8.76 | 6.12 | 8.34 | 8.18 | 3.87  |
| 4.8  | 4.16 | 4.35 | 7.52 | 8.14 | 7.9  | 5.52 | 6.1  | 4.98  |
| 2.56 | 2.18 | 3.54 | 4.43 | 3.49 | 3.24 | 2.83 | 2.48 | 1.97  |
| 3.51 | 2.14 | 3.79 | 2.12 | 4.02 | 2.65 | 3.06 | 3.34 | 1.53  |
| 9.44 | 9.84 | 9.21 | 9.19 | 9.21 | 9.48 | 9.65 | 9.61 | 11.38 |
| 7.25 | 6.87 | 5.12 | 6.2  | 6.22 | 4.32 | 4.46 | 5.24 | 6.29  |
| 7.94 | 7.28 | 5.49 | 5.68 | 6.08 | 4.77 | 6.66 | 8.03 | 7.73  |
| 2.91 | 2.3  | 3.44 | 4.15 | 4.22 | 3.9  | 2.17 | 1.78 | 1.69  |
| 6.56 | 4.18 | 6.35 | 5.34 | 5.01 | 1.46 | 4.32 | 3.47 | 6.2   |
| 3.3  | 3.17 | 3.07 | 3.43 | 3.26 | 3.17 | 3.17 | 2.96 | 2.95  |
| 5.85 | 6.2  | 6.75 | 5.68 | 6.53 | 7.43 | 6.57 | 5.44 | 3.65  |
| 1.69 | 1.85 | 1.82 | 1.72 | 2.16 | 1.51 | 1.7  | 1.94 | 1.51  |
| 7.62 | 8.79 | 7.19 | 7.9  | 6.79 | 7.89 | 7.02 | 8.1  | 9.33  |
| 4.39 | 3.69 | 3.39 | 4.35 | 4.46 | 4.44 | 4.52 | 4.15 | 3.5   |
| 4.15 | 4.75 | 4.95 | 4.58 | 4.41 | 5.7  | 4.97 | 5.07 | 4.09  |
| 4.11 | 3.77 | 3.94 | 4.54 | 5.14 | 4.09 | 4.23 | 4.63 | 4.2   |
| 2.45 | 2.25 | 2.3  | 2.63 | 2.25 | 2.94 | 2.18 | 2.14 | 2     |
| 5.04 | 4.02 | 3.89 | 4.83 | 5.27 | 4.47 | 3.99 | 4.54 | 4.37  |
| 7.87 | 7.38 | 7.06 | 7    | 6.74 | 6.36 | 6.88 | 6.85 | 5.54  |
| 2.86 | 2.68 | 2.35 | 1.72 | 2.7  | 1.97 | 2.34 | 2.42 | 2.21  |
| 4.55 | 3.6  | 4.48 | 3.4  | 3.6  | 3.99 | 5.08 | 4.93 | 3.98  |
| 6.72 | 7.82 | 8.14 | 7.38 | 6.15 | 7.68 | 8.17 | 8.01 | 8.93  |
| 3.93 | 3.3  | 3.39 | 4.22 | 4.25 | 4.57 | 3.84 | 3.47 | 3.85  |
| 2.21 | 2.85 | 2.44 | 2.4  | 2.32 | 3.62 | 2.51 | 2.56 | 2.11  |
| 2.04 | 2.42 | 1.97 | 2.1  | 1.97 | 1.88 | 2.28 | 2.23 | 1.96  |
| 2.27 | 2.58 | 2.63 | 2.18 | 2.64 | 2.03 | 1.95 | 2.14 | 2.05  |
| 3.72 | 4.28 | 4.27 | 4.76 | 4.96 | 6.47 | 4.83 | 5.07 | 3.86  |
| 5.53 | 3.67 | 3.75 | 5.7  | 5.45 | 5.43 | 3.75 | 4.54 | 4.81  |
| 1.89 | 1.82 | 1.74 | 1.96 | 1.9  | 1.76 | 2.27 | 2.13 | 2.06  |
| 2.39 | 2.7  | 2.67 | 8.13 | 7.42 | 4.08 | 8.56 | 7.95 | 2.66  |
| 3.19 | 3.31 | 3.07 | 2.48 | 3.34 | 3.2  | 3.46 | 3.52 | 3.14  |
| 3.24 | 2.74 | 3.08 | 3.03 | 2.87 | 2.05 | 2.35 | 2.4  | 2.45  |
| 5.4  | 7.74 | 5.37 | 6.32 | 6.05 | 5.87 | 6.38 | 6.14 | 9.95  |
| 5.13 | 6.65 | 4.98 | 4.58 | 4.02 | 4.62 | 3.1  | 3.39 | 3.27  |
| 3    | 1.76 | 1.77 | 2.5  | 2.39 | 2.45 | 2.25 | 2.63 | 2.47  |
| 2.24 | 2.56 | 2.84 | 2.33 | 2.23 | 2.69 | 1.91 | 1.95 | 2.11  |

|      |      |      |      |      |      |      |      |      |
|------|------|------|------|------|------|------|------|------|
| 2.26 | 2.21 | 2.18 | 2.84 | 2.2  | 1.97 | 2.39 | 2.34 | 1.86 |
| 1.5  | 1.58 | 1.32 | 1.71 | 1.67 | 1.52 | 1.53 | 1.72 | 1.53 |
| 2.59 | 2.53 | 2.48 | 3.26 | 2.01 | 2.12 | 2.55 | 2.46 | 2.24 |
| 7.82 | 7.62 | 8.23 | 6.86 | 7.21 | 8.09 | 8.15 | 8.19 | 9.53 |
| 3.51 | 3.29 | 3.47 | 3.26 | 2.58 | 2.31 | 2.36 | 2.49 | 5.6  |
| 8.61 | 7.24 | 8.26 | 8.56 | 8.29 | 9.27 | 7    | 7.45 | 5.87 |
| 2.77 | 3.16 | 2.8  | 3.72 | 3    | 3.17 | 3.05 | 3.12 | 3.95 |
| 2.74 | 5.02 | 4.14 | 2.47 | 6.67 | 3.66 | 2.85 | 3.19 | 5.29 |
| 9.63 | 8.9  | 9.17 | 9.71 | 9.79 | 9.95 | 9.22 | 9.35 | 7.37 |
| 2.74 | 2.21 | 1.72 | 1.83 | 2.38 | 1.71 | 2.3  | 1.85 | 1.63 |
| 2.43 | 2.37 | 2.41 | 2.31 | 2.25 | 2.35 | 2.01 | 2.14 | 2.28 |
| 2.42 | 2.81 | 2.48 | 2.53 | 2.26 | 2.43 | 3.09 | 2.29 | 2.31 |
| 3.56 | 2.09 | 1.79 | 2.03 | 1.8  | 2.05 | 1.6  | 1.65 | 1.6  |
| 6.25 | 6.12 | 5.92 | 6.07 | 5.8  | 6.45 | 5.64 | 4.71 | 7.83 |
| 1.92 | 1.61 | 4.1  | 2.09 | 1.74 | 1.92 | 1.93 | 1.81 | 2.35 |
| 2.95 | 5.41 | 3.8  | 2.93 | 3.78 | 3.53 | 3.44 | 4.4  | 1.87 |
| 7.14 | 6.57 | 3.38 | 3.87 | 5.54 | 7.08 | 4.37 | 4.37 | 9.68 |
| 1.52 | 1.65 | 2.09 | 1.54 | 1.57 | 1.54 | 1.74 | 1.61 | 1.56 |
| 2.92 | 2.38 | 4.37 | 3.56 | 4.49 | 3.57 | 3.63 | 3.43 | 2.92 |
| 1.78 | 1.67 | 2.57 | 1.36 | 1.24 | 1.36 | 1.27 | 1.37 | 1.33 |
| 2.54 | 2.2  | 2.08 | 2.08 | 1.84 | 2.15 | 2.45 | 2.19 | 1.87 |
| 1.95 | 1.46 | 2.11 | 2.02 | 2.57 | 1.67 | 1.76 | 1.87 | 1.91 |
| 6.42 | 7.86 | 4.19 | 7.9  | 6.13 | 8.25 | 3.96 | 5.46 | 5.71 |
| 3.05 | 3.12 | 4.07 | 2.78 | 3.1  | 2.36 | 2.63 | 2.64 | 6.01 |

| X348  | X350  | X351  | X409  | X410  | X418  | X419  | X436  | X441  |
|-------|-------|-------|-------|-------|-------|-------|-------|-------|
| 4     | 4     | 4     | 4     | 4     | 4     | 4     | 4     | 4     |
| 6.96  | 4.96  | 1.89  | 7.55  | 5.73  | 2.48  | 1.58  | 5.16  | 3.17  |
| 7.46  | 7.46  | 7.23  | 7.83  | 7.85  | 7.51  | 7.37  | 7.2   | 7.39  |
| 1.85  | 2.35  | 2.45  | 2.24  | 2.26  | 1.9   | 2.02  | 2.04  | 2.48  |
| 9     | 9.23  | 8.88  | 8.28  | 9.16  | 8.23  | 8.5   | 8.54  | 9.38  |
| 6.65  | 7.33  | 6.87  | 7.82  | 8.05  | 7.19  | 7.93  | 7.91  | 7.54  |
| 7.7   | 5.68  | 4.8   | 4.74  | 7.02  | 5.13  | 4.2   | 3.34  | 5.63  |
| 6.83  | 7.42  | 5.99  | 6.86  | 7.02  | 6.56  | 7.26  | 7.97  | 7.07  |
| 1.73  | 1.46  | 1.71  | 1.51  | 1.31  | 1.65  | 1.69  | 1.84  | 1.53  |
| 8.19  | 7.24  | 7.05  | 8.18  | 7.69  | 7.54  | 7.98  | 8.45  | 9.92  |
| 8.16  | 5.92  | 5.93  | 5.83  | 6.32  | 5.91  | 5.99  | 6.66  | 6.15  |
| 4.53  | 4.76  | 6.6   | 3.96  | 5.12  | 3.52  | 3.26  | 3.59  | 3.34  |
| 10.4  | 5.05  | 9.06  | 9.35  | 8.71  | 9.49  | 8.18  | 9.16  | 9.5   |
| 2.91  | 2.21  | 4.47  | 5.41  | 3.21  | 6.98  | 4.29  | 3.69  | 4.78  |
| 2.58  | 2.53  | 2.21  | 3.07  | 3.05  | 2.41  | 2.23  | 2.16  | 3.07  |
| 4.6   | 3.24  | 3.14  | 4.26  | 4.35  | 4.18  | 4.31  | 4.56  | 7.73  |
| 3.09  | 2.79  | 5.13  | 5.26  | 3.47  | 7.72  | 6.07  | 4.54  | 4.72  |
| 2.25  | 1.74  | 2.82  | 1.55  | 1.95  | 1.78  | 1.82  | 1.76  | 2.38  |
| 2.3   | 7.92  | 6.46  | 4.23  | 5.82  | 4.44  | 3.09  | 5     | 4.79  |
| 6.41  | 4.34  | 4.99  | 4.19  | 4.75  | 5.1   | 6.48  | 6.09  | 5.8   |
| 3.16  | 2.96  | 2.87  | 2.4   | 2.87  | 2.56  | 2.36  | 3.5   | 3.21  |
| 7.61  | 10.37 | 3.34  | 9.71  | 9.57  | 7.21  | 5.41  | 5.49  | 7.74  |
| 3.68  | 3.18  | 2.6   | 2.6   | 3.56  | 2.44  | 2.96  | 3.07  | 2.85  |
| 4.14  | 3.09  | 3.82  | 4     | 3.3   | 3.34  | 3.44  | 4.04  | 3.64  |
| 3.79  | 3.82  | 5.13  | 4.35  | 4.14  | 5.5   | 6.1   | 4.6   | 4.12  |
| 6.88  | 4.25  | 5.15  | 5.22  | 4.57  | 5.18  | 4.8   | 4.95  | 4.95  |
| 8.64  | 10.42 | 9.89  | 9.55  | 9.04  | 10.24 | 9.91  | 10.01 | 9.98  |
| 3.61  | 3.76  | 3.56  | 5.4   | 3.69  | 3.99  | 3.93  | 3.99  | 3.4   |
| 12.51 | 10.32 | 11.24 | 11.52 | 10.76 | 12.15 | 10.94 | 12.68 | 12.41 |
| 4.37  | 8.46  | 8.17  | 5.03  | 9.97  | 7.16  | 8.92  | 5.94  | 6.72  |
| 3.27  | 2.46  | 3.1   | 2.7   | 2.36  | 3.31  | 3.11  | 3.3   | 3.32  |
| 4.56  | 4.99  | 4.57  | 4.3   | 5.14  | 4.97  | 5.18  | 6.33  | 5.03  |
| 10.33 | 9.46  | 8.8   | 9.2   | 9.63  | 8.76  | 8.83  | 9.06  | 8.27  |
| 2.71  | 2.71  | 2.57  | 3.05  | 2.85  | 2.57  | 2.6   | 2.99  | 2.18  |
| 2.33  | 2.38  | 2.74  | 3.48  | 3.65  | 3.16  | 3.44  | 3.65  | 3     |
| 4.33  | 2     | 2.48  | 2.14  | 1.94  | 1.75  | 2.73  | 2.36  | 2.02  |
| 8.99  | 7.75  | 7.26  | 7.5   | 7.6   | 6.95  | 6.8   | 6.94  | 6.13  |
| 10.49 | 11.71 | 11.07 | 11.29 | 12.09 | 12.16 | 12.64 | 12.53 | 12.31 |
| 2.33  | 3.82  | 2.44  | 2.41  | 2.06  | 2.53  | 2.08  | 2.4   | 2.1   |
| 2.19  | 1.93  | 2.35  | 2.05  | 1.75  | 2.44  | 2.52  | 1.97  | 1.8   |
| 1.72  | 2.61  | 3.27  | 2.03  | 3.15  | 2.93  | 2.88  | 2.14  | 4.91  |
| 5.78  | 4.35  | 3.83  | 4.57  | 4.52  | 3.44  | 3.91  | 4     | 4.06  |
| 6.73  | 6.73  | 6.82  | 7.59  | 7.14  | 7.54  | 8.17  | 7.42  | 7.19  |
| 2.81  | 2.17  | 2.54  | 2.7   | 2.33  | 2.17  | 2.55  | 2.3   | 2.61  |
| 2.2   | 2.43  | 2.93  | 2.09  | 2.55  | 2.53  | 2.83  | 2.87  | 2.46  |
| 5.6   | 4.52  | 6.06  | 3.82  | 4.02  | 5.14  | 4.45  | 6.59  | 3.78  |
| 4.22  | 3.12  | 3.07  | 2.24  | 2.81  | 2.99  | 2.72  | 2.21  | 3.14  |
| 6.54  | 5.74  | 5.32  | 5.75  | 5.68  | 5.3   | 4.68  | 4.62  | 5.21  |
| 2.36  | 2.48  | 2.37  | 2.47  | 2.51  | 2.58  | 2.14  | 3.81  | 2.36  |
| 4.42  | 2.66  | 3.35  | 4.12  | 4.09  | 3.49  | 2.79  | 4.19  | 4.09  |
| 3.06  | 2.39  | 2.46  | 6.46  | 7.16  | 3.29  | 3.36  | 3.45  | 2.81  |

|      |       |       |      |      |      |       |       |       |
|------|-------|-------|------|------|------|-------|-------|-------|
| 2.12 | 2.08  | 1.69  | 2.49 | 2.01 | 2.05 | 2.02  | 1.88  | 1.93  |
| 3.18 | 6.99  | 3.23  | 4.92 | 4.49 | 3.04 | 2.91  | 2.99  | 3.07  |
| 7.33 | 3.88  | 3.4   | 4.74 | 3.87 | 3.08 | 3     | 4.12  | 5.27  |
| 3.28 | 4.81  | 3.13  | 5.43 | 4.4  | 4.26 | 2.62  | 3.03  | 3.31  |
| 6.1  | 3.49  | 4.39  | 3.4  | 4.04 | 4.4  | 4.59  | 3.47  | 3.61  |
| 1.85 | 2.04  | 1.69  | 1.79 | 1.89 | 1.83 | 1.8   | 1.96  | 1.68  |
| 7.28 | 5.09  | 6.03  | 3.87 | 5.12 | 5.34 | 7.41  | 7.03  | 6.13  |
| 4.97 | 5.54  | 4.86  | 6.04 | 5.72 | 5.23 | 4.97  | 6.26  | 4.84  |
| 2.98 | 3.25  | 3.02  | 3.46 | 3.57 | 2.76 | 3.09  | 3.27  | 3.25  |
| 8.19 | 7.44  | 8.66  | 7.31 | 6.98 | 9.01 | 7.08  | 7.94  | 8.4   |
| 8.52 | 8.04  | 7.82  | 8.66 | 6.46 | 7.47 | 7.14  | 6.98  | 8.14  |
| 3.68 | 2.25  | 10.04 | 3.25 | 2.24 | 3.08 | 11.08 | 4.07  | 2.17  |
| 3.73 | 1.97  | 7.29  | 2.47 | 2.28 | 3.11 | 4.87  | 1.7   | 6.18  |
| 7    | 6.26  | 9.08  | 8.38 | 7.83 | 9.72 | 9.64  | 9.72  | 9.28  |
| 6.44 | 3.94  | 5.1   | 5.53 | 5.5  | 6.04 | 6.99  | 6.05  | 6.02  |
| 2.57 | 2.82  | 2.36  | 2.32 | 2.46 | 2.53 | 2.34  | 2.28  | 2.37  |
| 7.62 | 8.26  | 8.32  | 6.17 | 7.77 | 7.67 | 8.12  | 7.16  | 3.86  |
| 6.45 | 4.55  | 7.44  | 6.43 | 4.22 | 6.14 | 7.66  | 7.31  | 5.78  |
| 1.59 | 2.01  | 1.64  | 1.97 | 1.97 | 1.66 | 1.69  | 1.8   | 1.69  |
| 4.98 | 4.46  | 5.39  | 4.81 | 4.32 | 4.31 | 4.31  | 4.75  | 4.91  |
| 1.79 | 1.53  | 1.56  | 1.78 | 1.84 | 1.94 | 2     | 1.79  | 1.93  |
| 1.76 | 1.86  | 1.39  | 1.63 | 1.61 | 1.98 | 1.84  | 1.62  | 1.55  |
| 2.36 | 2.44  | 2.12  | 2.43 | 2.91 | 2.21 | 2.8   | 2.03  | 2.33  |
| 4.15 | 3.49  | 3.53  | 3.56 | 3.49 | 3.23 | 3.23  | 4.29  | 2.97  |
| 3.26 | 3.71  | 3.71  | 3.06 | 3.7  | 3.24 | 3.33  | 3.59  | 3.38  |
| 1.69 | 1.68  | 1.52  | 1.65 | 1.62 | 1.7  | 1.61  | 1.5   | 1.69  |
| 2.46 | 2.77  | 2.63  | 2.44 | 2.72 | 2.33 | 2.56  | 2.73  | 2.46  |
| 8.52 | 8.16  | 8.33  | 8.18 | 8.44 | 7.9  | 7.61  | 7.29  | 8.04  |
| 4.04 | 4.36  | 4.2   | 4.51 | 4.47 | 4.34 | 4.04  | 4.15  | 4.37  |
| 2.4  | 2.66  | 2.39  | 2.7  | 2.92 | 2.42 | 2.92  | 2.84  | 2.46  |
| 2.13 | 2.56  | 2.88  | 2.24 | 2.15 | 2.32 | 2.55  | 2.25  | 2.08  |
| 10.1 | 6.91  | 4.29  | 8.66 | 8.73 | 4.86 | 5.73  | 7.8   | 8.72  |
| 7.44 | 10.33 | 6.56  | 9.87 | 9.76 | 6.78 | 7.39  | 6.84  | 6.33  |
| 1.8  | 2     | 1.97  | 2.16 | 2.02 | 2.04 | 2.06  | 2.01  | 1.93  |
| 2.16 | 2.3   | 2.78  | 2.96 | 2.31 | 2.15 | 2.53  | 2.18  | 2.15  |
| 11.1 | 9.59  | 9.59  | 8.76 | 9.58 | 9.6  | 11.38 | 10.66 | 10.33 |
| 5.2  | 4.29  | 6.15  | 4.87 | 4.9  | 5.8  | 6.67  | 6.25  | 4.83  |
| 8.92 | 7.24  | 8.34  | 9.03 | 7.71 | 8.83 | 9.15  | 8.72  | 8.31  |
| 9.96 | 3.27  | 1.61  | 7.26 | 2.87 | 2.03 | 1.77  | 6.86  | 3.1   |
| 1.85 | 1.68  | 1.47  | 1.72 | 1.92 | 1.95 | 1.73  | 2.1   | 1.79  |
| 6.69 | 3.51  | 5.85  | 3.52 | 6.16 | 6.75 | 8.44  | 7.86  | 7.96  |
| 7.35 | 7.74  | 8.66  | 7.59 | 8.24 | 9.14 | 9.78  | 8.87  | 8.92  |
| 2.6  | 1.97  | 2.21  | 2.25 | 2.27 | 2.17 | 2.04  | 2.09  | 2.16  |
| 3.21 | 2.72  | 2.8   | 2.93 | 3.19 | 2.67 | 2.97  | 3.17  | 2.83  |
| 4.03 | 2.78  | 3.67  | 3.55 | 2.87 | 3.07 | 3.68  | 4.45  | 3.1   |
| 7.13 | 4.12  | 5.56  | 4.99 | 5    | 4.45 | 4.24  | 3.95  | 4.44  |
| 1.59 | 1.69  | 1.78  | 1.81 | 1.6  | 1.85 | 1.64  | 1.86  | 1.68  |
| 3.78 | 2.84  | 2.88  | 2.91 | 2.7  | 3.31 | 3.16  | 3     | 2.38  |
| 7.91 | 9.14  | 9.36  | 9.67 | 8.08 | 9.16 | 8.8   | 8.88  | 8.47  |
| 2.79 | 3.53  | 3.07  | 2.56 | 2.03 | 2.46 | 2.83  | 2.79  | 2.48  |
| 4.92 | 3.65  | 4.61  | 3.59 | 4.09 | 4.5  | 6.07  | 3.55  | 3.9   |
| 2.05 | 1.56  | 1.91  | 1.72 | 1.83 | 2.17 | 1.94  | 1.8   | 2.33  |

|       |       |       |      |      |      |      |      |       |
|-------|-------|-------|------|------|------|------|------|-------|
| 4.98  | 3.27  | 3.29  | 4.51 | 4.04 | 3.51 | 2.98 | 3.68 | 4     |
| 3.26  | 2.07  | 1.97  | 1.98 | 1.99 | 1.62 | 1.69 | 2.12 | 2.03  |
| 1.82  | 2.58  | 1.9   | 2.27 | 2.85 | 2.21 | 2.76 | 2.17 | 2.41  |
| 2.06  | 2.11  | 3.06  | 2.29 | 2.28 | 2.31 | 2.62 | 2.65 | 2.38  |
| 2.33  | 1.7   | 1.65  | 2.43 | 1.56 | 1.99 | 1.94 | 3.7  | 2.24  |
| 2.02  | 2.38  | 2.24  | 2.34 | 2.05 | 1.98 | 2.07 | 2.35 | 2.12  |
| 2.04  | 5.49  | 5.26  | 3.14 | 2.86 | 3.84 | 3.07 | 3.41 | 4.02  |
| 2.36  | 2.14  | 2.93  | 2    | 2.56 | 2.69 | 2.64 | 2.69 | 2.36  |
| 5.11  | 6.21  | 4.97  | 5.51 | 4.99 | 4.9  | 4.44 | 4.93 | 5.18  |
| 3.94  | 2.06  | 2.63  | 2.43 | 1.91 | 2.55 | 2.05 | 2.35 | 2.06  |
| 5.72  | 6.14  | 7.5   | 6.1  | 6.78 | 7.33 | 7.85 | 7.46 | 7.76  |
| 1.55  | 1.49  | 1.33  | 2.17 | 1.55 | 1.74 | 1.6  | 1.53 | 1.7   |
| 3.64  | 2.22  | 2.6   | 2.88 | 2.65 | 2.99 | 2.22 | 3.13 | 2.88  |
| 6.56  | 3.61  | 5.36  | 4.07 | 4.82 | 6.3  | 8.14 | 7.97 | 8.03  |
| 7.38  | 7.08  | 7.06  | 6.69 | 6.73 | 6.58 | 6.84 | 6.34 | 6.24  |
| 3.94  | 6.17  | 4.84  | 6.54 | 5.13 | 5.32 | 3.85 | 3.5  | 4.58  |
| 4.49  | 8.12  | 7.98  | 9.01 | 8.05 | 6.03 | 7.85 | 6.35 | 5.13  |
| 5.87  | 4.05  | 5.88  | 3.64 | 6    | 6.81 | 8.73 | 8.04 | 8.32  |
| 3.02  | 2.62  | 2.33  | 2.15 | 2.24 | 3.02 | 3.56 | 6.69 | 2.65  |
| 1.72  | 1.64  | 1.63  | 5.23 | 1.6  | 3.09 | 3.17 | 3.99 | 1.77  |
| 10.74 | 10.17 | 10.03 | 9.08 | 10.3 | 9.71 | 9.99 | 9.44 | 10.27 |
| 5.69  | 6.04  | 6.17  | 5.45 | 6.92 | 6.54 | 6.1  | 5.45 | 7.52  |
| 7.09  | 6.86  | 7.2   | 6.73 | 6.96 | 6.47 | 6.72 | 6.06 | 7.84  |
| 1.73  | 1.98  | 1.69  | 2.39 | 1.94 | 1.9  | 1.96 | 2.95 | 1.58  |
| 5.66  | 5.91  | 5.03  | 5.18 | 6.64 | 3.25 | 5.07 | 4.41 | 6.12  |
| 2.77  | 2.85  | 3.33  | 3.33 | 3.04 | 2.77 | 3.09 | 3.34 | 2.82  |
| 4.66  | 6.99  | 6.48  | 6.32 | 6.15 | 5.7  | 6.63 | 6.55 | 5.2   |
| 1.78  | 1.71  | 1.76  | 1.72 | 1.57 | 1.68 | 1.85 | 1.7  | 1.92  |
| 9.36  | 6.53  | 5.94  | 7.27 | 7.87 | 5.29 | 7.75 | 7.92 | 8.31  |
| 3.4   | 4.79  | 5.33  | 4.69 | 5.15 | 4.38 | 4.82 | 3.54 | 5.07  |
| 4.49  | 6.22  | 5.58  | 4.94 | 5.22 | 4.74 | 5.27 | 5.15 | 5.55  |
| 3.82  | 4.33  | 3.98  | 3.22 | 4.86 | 4.16 | 4.24 | 4.24 | 4.04  |
| 1.99  | 2.27  | 2     | 2.26 | 2.31 | 2.53 | 2.36 | 1.93 | 2.19  |
| 4.03  | 4.01  | 3.78  | 4.04 | 3.68 | 4.29 | 4.03 | 5    | 4.01  |
| 7.2   | 7.97  | 6.77  | 7.3  | 6.68 | 7.02 | 7.09 | 6.31 | 7.81  |
| 3.19  | 2.15  | 2.02  | 3.01 | 2.72 | 2.36 | 3.76 | 3.32 | 5.61  |
| 4.43  | 6.32  | 4.19  | 4.9  | 4.66 | 4.4  | 4.28 | 4.42 | 4.87  |
| 8.9   | 8.19  | 7.79  | 6.76 | 7.14 | 7.54 | 8.03 | 6.7  | 7.4   |
| 4.04  | 3.49  | 3.87  | 3.32 | 3.17 | 3.41 | 3.94 | 3.72 | 3     |
| 2.65  | 2.59  | 3.5   | 2.67 | 2.27 | 2.51 | 2.43 | 2.81 | 2.31  |
| 2.05  | 2.05  | 2.17  | 2.28 | 2.41 | 2.18 | 2.29 | 2.17 | 2.24  |
| 1.97  | 2.05  | 1.98  | 2.38 | 2.22 | 2.19 | 2.1  | 2.08 | 2.13  |
| 3.39  | 5.12  | 4.14  | 3.64 | 5.08 | 5.33 | 6.15 | 4.84 | 5.44  |
| 4.07  | 4.41  | 4.03  | 4.11 | 3.17 | 4.6  | 3.95 | 4.8  | 3.69  |
| 1.85  | 1.96  | 1.87  | 1.78 | 1.96 | 2.12 | 2.14 | 1.92 | 1.97  |
| 2.62  | 3.28  | 2.86  | 2.4  | 7.5  | 3.27 | 6.43 | 3.13 | 7.51  |
| 3.32  | 3.61  | 3.45  | 3.18 | 3.8  | 3.64 | 3.13 | 3.52 | 3.59  |
| 2.09  | 2.27  | 2.26  | 2.25 | 2.24 | 1.95 | 2.63 | 2.22 | 2.46  |
| 9.59  | 6.89  | 6.47  | 5.49 | 7.5  | 6.37 | 6.65 | 5.9  | 6.83  |
| 2.85  | 3.96  | 3.68  | 4.39 | 5.11 | 4.14 | 3.91 | 3.89 | 5.76  |
| 2.36  | 2.16  | 2.19  | 2.23 | 2.14 | 2.08 | 2.04 | 2.17 | 2.22  |
| 1.8   | 2.09  | 2.29  | 2.03 | 2.27 | 1.9  | 2.42 | 2.53 | 1.71  |

|      |      |      |      |      |      |      |      |      |
|------|------|------|------|------|------|------|------|------|
| 2    | 2.03 | 2.29 | 2.13 | 1.96 | 2.03 | 1.89 | 2.18 | 2.38 |
| 1.45 | 1.45 | 1.71 | 1.59 | 1.55 | 1.56 | 1.61 | 1.63 | 1.52 |
| 2.74 | 2.29 | 2.49 | 2.73 | 2.56 | 2.46 | 1.98 | 2.19 | 2.7  |
| 9.79 | 7.15 | 7.73 | 6.81 | 7.64 | 7.24 | 6.8  | 7.34 | 8.41 |
| 5.65 | 2.24 | 2.6  | 3.67 | 2.78 | 2.64 | 2.61 | 3.31 | 2.39 |
| 5.92 | 6.56 | 6.23 | 7.25 | 6.76 | 7.15 | 7.63 | 6.39 | 7.05 |
| 3.94 | 2.79 | 3.9  | 2.83 | 3.36 | 3.77 | 3.05 | 3.18 | 3.59 |
| 6.28 | 3.24 | 3.46 | 3.92 | 6.87 | 4.18 | 3.09 | 3.62 | 7.49 |
| 7.91 | 8.41 | 8.64 | 9.39 | 8.69 | 9.15 | 9.53 | 8.62 | 8.75 |
| 1.88 | 1.85 | 2.35 | 1.72 | 1.81 | 2.08 | 1.98 | 1.6  | 2.1  |
| 1.9  | 1.68 | 1.87 | 1.81 | 1.62 | 1.79 | 1.72 | 1.77 | 1.8  |
| 2.68 | 2.02 | 1.75 | 2.12 | 2.11 | 1.95 | 3.14 | 1.92 | 1.93 |
| 1.83 | 1.75 | 1.73 | 1.82 | 1.86 | 2.03 | 1.81 | 2    | 1.83 |
| 8.24 | 5.16 | 5.67 | 6.56 | 6.91 | 6.18 | 5.55 | 5.37 | 7.3  |
| 2.82 | 1.92 | 1.97 | 2.51 | 1.65 | 1.91 | 1.8  | 1.86 | 1.83 |
| 3.48 | 3.52 | 5.93 | 3.67 | 5.53 | 3.54 | 3.77 | 4.69 | 5.61 |
| 6.89 | 4.25 | 6.15 | 3.47 | 5.63 | 6.32 | 6.49 | 7.16 | 4.92 |
| 1.72 | 1.56 | 1.39 | 1.66 | 1.64 | 1.53 | 1.64 | 1.55 | 1.56 |
| 4    | 2.43 | 4.63 | 2.43 | 2.95 | 3.65 | 4.61 | 3.63 | 3.4  |
| 2.08 | 1.58 | 1.53 | 3.76 | 3.79 | 1.36 | 1.34 | 2.08 | 1.25 |
| 2.03 | 2.57 | 1.96 | 2.12 | 2.02 | 1.87 | 1.84 | 1.98 | 2.11 |
| 1.64 | 1.61 | 1.45 | 1.91 | 1.43 | 2.16 | 1.48 | 1.83 | 1.35 |
| 5.45 | 4.02 | 2.78 | 2.77 | 2.66 | 3.93 | 4.68 | 4.97 | 4.66 |
| 5.39 | 3.14 | 2.48 | 3.77 | 3.43 | 2.38 | 2.35 | 2.39 | 2.55 |



| X446  | X449  | X184  | X185  | X186  | X187  | X188  | X189  | X190  |
|-------|-------|-------|-------|-------|-------|-------|-------|-------|
| 4     | 4     | 5     | 5     | 5     | 5     | 5     | 5     | 5     |
| 2.06  | 3.03  | 2.35  | 1.98  | 4.04  | 1.74  | 1.47  | 2.76  | 2.31  |
| 7.89  | 7.18  | 7.17  | 7.03  | 6.03  | 7.3   | 7.1   | 6.09  | 7.39  |
| 1.8   | 2.13  | 2.08  | 1.96  | 2.47  | 1.87  | 2.1   | 2.65  | 2.12  |
| 8.16  | 8.39  | 5.75  | 6.21  | 7.24  | 7.04  | 8.17  | 7.95  | 6.88  |
| 6.66  | 7.13  | 6.71  | 8.04  | 7.05  | 7.86  | 6.13  | 5.72  | 6.92  |
| 5.5   | 6.05  | 6.71  | 5.53  | 6.06  | 5.6   | 5.55  | 5.91  | 5.83  |
| 7.07  | 6.81  | 7.62  | 7.29  | 7.54  | 7.01  | 6.46  | 7.23  | 7.88  |
| 2.22  | 1.55  | 2.27  | 1.6   | 1.79  | 1.66  | 2.86  | 1.9   | 2.77  |
| 6.99  | 7.82  | 6.3   | 6.51  | 6.66  | 6.97  | 6.09  | 8.21  | 7.89  |
| 5.98  | 5.44  | 6.26  | 4.7   | 3.35  | 5.38  | 6.09  | 4.38  | 4.78  |
| 3.43  | 3.06  | 3.77  | 5.65  | 3.17  | 4.22  | 4.19  | 2.91  | 4.04  |
| 7.94  | 8.86  | 8.99  | 8.9   | 4.23  | 7.94  | 8.38  | 5.56  | 9.52  |
| 4.68  | 3.14  | 2.98  | 2.31  | 2.38  | 5.33  | 3.1   | 3.39  | 3.3   |
| 2.26  | 2.04  | 2.43  | 2.22  | 2.44  | 2.57  | 2.64  | 2.29  | 2.17  |
| 3.04  | 3.77  | 2.44  | 3.4   | 3.49  | 3.69  | 2.52  | 4.38  | 4.3   |
| 5.35  | 4.16  | 3.3   | 3.48  | 2.54  | 5.91  | 3.75  | 4.18  | 3.82  |
| 1.84  | 1.61  | 1.64  | 1.72  | 1.36  | 1.71  | 1.69  | 1.26  | 1.86  |
| 4.72  | 4.49  | 2.55  | 4.77  | 5.98  | 3.84  | 3.45  | 4.29  | 5.16  |
| 5.2   | 5.37  | 4.31  | 4.6   | 6.8   | 5.23  | 6     | 7.1   | 6.26  |
| 2.53  | 2.84  | 3.05  | 2.39  | 2.16  | 2.94  | 3.28  | 2.57  | 2.47  |
| 5.22  | 6.78  | 6.24  | 6.42  | 8.1   | 7.54  | 7.07  | 6.98  | 7.8   |
| 2.52  | 3.21  | 2.98  | 2.84  | 2.5   | 2.44  | 3.62  | 2.85  | 2.33  |
| 3.79  | 2.96  | 2.53  | 2.69  | 3.2   | 3.79  | 3.81  | 3.13  | 4.87  |
| 5.33  | 5.16  | 7.75  | 6.58  | 4.67  | 6.17  | 4.73  | 6.34  | 6.88  |
| 4.49  | 3.79  | 4.54  | 7.07  | 6.42  | 4.58  | 3.76  | 7.98  | 6.09  |
| 10.07 | 6.35  | 5.42  | 9.77  | 7.37  | 9.24  | 9.62  | 7.87  | 8.1   |
| 5.38  | 3.59  | 4.41  | 6.15  | 2.45  | 4.48  | 4.18  | 4.72  | 5.89  |
| 12.48 | 11.28 | 12.07 | 11.83 | 11.21 | 11.89 | 12.04 | 11.23 | 13.05 |
| 6.15  | 5.88  | 4.75  | 6.52  | 4.77  | 7.77  | 7.65  | 5.6   | 4.47  |
| 3.43  | 2.63  | 3.15  | 3.36  | 3.57  | 3.95  | 3.18  | 3.25  | 3.71  |
| 5.12  | 5.82  | 6.06  | 4.54  | 6.48  | 5.75  | 4.96  | 7.27  | 6.28  |
| 10.26 | 9.42  | 9.66  | 9.81  | 8.13  | 8.4   | 10.73 | 8.48  | 8.34  |
| 2.56  | 2.43  | 2.56  | 2.73  | 2.4   | 2.38  | 2.71  | 3.52  | 2.62  |
| 3.26  | 3.25  | 2.69  | 3.16  | 2.37  | 2.69  | 2.55  | 2.49  | 2.58  |
| 2.43  | 2.35  | 2.15  | 2.35  | 2.73  | 2.08  | 3.06  | 2.11  | 2.36  |
| 8.46  | 7.92  | 7.93  | 7.83  | 6.05  | 5.47  | 9.09  | 6.48  | 6.22  |
| 12.37 | 12.42 | 11.12 | 10.58 | 12.09 | 13.2  | 12.02 | 13.05 | 12.51 |
| 2.06  | 2.28  | 2.65  | 2.68  | 2.48  | 2.03  | 2.15  | 2.17  | 2.57  |
| 2.06  | 2.18  | 3.86  | 2.21  | 2.08  | 2.01  | 2.35  | 2.34  | 1.81  |
| 2.72  | 2.73  | 3.13  | 2.16  | 2.88  | 2.75  | 2.45  | 3.8   | 2.42  |
| 4.58  | 3.49  | 5.2   | 3.59  | 4.97  | 3.87  | 5.19  | 4.74  | 6.31  |
| 7.9   | 7.96  | 9.01  | 7.99  | 8.68  | 8.69  | 8.03  | 8.54  | 8.97  |
| 2.08  | 2.3   | 1.95  | 2.01  | 2.08  | 2.13  | 2.08  | 2.38  | 1.83  |
| 2.43  | 2.6   | 3.55  | 3.46  | 2.25  | 3.72  | 2.83  | 2.87  | 2.4   |
| 5.16  | 6.2   | 4.51  | 3.4   | 3.95  | 3.94  | 5.88  | 3.02  | 4.5   |
| 2.79  | 2.6   | 4.09  | 4.07  | 3.15  | 3.05  | 2.91  | 2.17  | 3.65  |
| 5.32  | 5.23  | 5.02  | 4.62  | 5.44  | 4.94  | 5.08  | 4.49  | 5.08  |
| 2.37  | 1.87  | 2.19  | 3.3   | 2.49  | 2.64  | 2.84  | 2.65  | 2.53  |
| 3.56  | 3.25  | 2.19  | 2.8   | 2.85  | 3.1   | 3.64  | 2.12  | 3.14  |
| 2.75  | 2.33  | 2.03  | 3.5   | 2.57  | 3.52  | 2.6   | 6.73  | 5.84  |

|      |      |       |      |       |       |       |       |       |
|------|------|-------|------|-------|-------|-------|-------|-------|
| 2.09 | 2.18 | 2.17  | 1.98 | 2.01  | 2.38  | 1.57  | 1.67  | 1.73  |
| 4.88 | 2.95 | 3.03  | 3.97 | 2.71  | 2.27  | 2.46  | 2.46  | 2.55  |
| 3.07 | 3.22 | 4.64  | 2.57 | 3.28  | 2.93  | 3.33  | 3.75  | 2.05  |
| 5.44 | 3.91 | 3.19  | 4.6  | 4.55  | 3.46  | 5.2   | 2.27  | 5.1   |
| 2.81 | 2.98 | 3.03  | 3.46 | 3.52  | 2.3   | 1.74  | 2.91  | 3.8   |
| 1.84 | 1.76 | 1.88  | 1.71 | 1.74  | 1.8   | 1.66  | 1.83  | 1.8   |
| 5.49 | 6.26 | 6     | 4.41 | 7.3   | 5.12  | 7     | 8.32  | 6.49  |
| 5.73 | 4.53 | 5.46  | 6.38 | 5.37  | 6.1   | 5.91  | 6.08  | 5.74  |
| 3.07 | 2.88 | 3.15  | 3.7  | 3.11  | 2.85  | 3.45  | 3.1   | 2.77  |
| 9.07 | 8.71 | 8.11  | 9.72 | 11.42 | 9.14  | 8.76  | 8.24  | 9.29  |
| 7.87 | 6.94 | 8.62  | 7.85 | 8.08  | 8.87  | 8.67  | 8.06  | 8.35  |
| 2.6  | 2.58 | 2.88  | 3.03 | 6.93  | 5.85  | 1.96  | 5.41  | 4.14  |
| 3.41 | 3.21 | 6.55  | 5.3  | 3.37  | 6.22  | 5.84  | 3.05  | 2.59  |
| 8.53 | 8.74 | 9.14  | 7.4  | 7     | 8.37  | 9.11  | 6.95  | 8.03  |
| 5.42 | 5.94 | 5.65  | 5.73 | 6.8   | 5.36  | 6.08  | 6.5   | 5.75  |
| 2.29 | 2.26 | 2.31  | 2.31 | 1.84  | 2.2   | 2.13  | 2.28  | 2.1   |
| 7.01 | 7.73 | 7.66  | 7.31 | 7.08  | 7.5   | 7.72  | 7.46  | 7.42  |
| 7.62 | 7.11 | 8.76  | 7.16 | 6.89  | 7.23  | 8.39  | 7.8   | 5.94  |
| 1.6  | 1.75 | 1.97  | 1.7  | 1.54  | 1.84  | 1.86  | 1.56  | 1.72  |
| 5.53 | 4.37 | 4     | 4.88 | 3.47  | 4.74  | 4.57  | 4.51  | 4.19  |
| 1.9  | 2.01 | 1.88  | 1.52 | 1.75  | 1.8   | 1.7   | 1.73  | 1.55  |
| 1.69 | 1.85 | 1.73  | 1.65 | 1.64  | 1.76  | 1.52  | 1.44  | 1.53  |
| 2.51 | 2.63 | 1.87  | 3.83 | 5.73  | 2.19  | 3.12  | 3.36  | 2.98  |
| 3.66 | 3.11 | 2.57  | 3.54 | 3.95  | 2.83  | 3.89  | 2.98  | 2.48  |
| 2.77 | 4.15 | 3.89  | 2.9  | 3.86  | 4.26  | 2.96  | 4.21  | 3.32  |
| 1.57 | 1.71 | 1.55  | 1.59 | 1.59  | 1.43  | 1.62  | 1.42  | 1.54  |
| 2.56 | 2.68 | 2.3   | 2.46 | 2.47  | 2.91  | 2.39  | 2.48  | 2.7   |
| 7.91 | 7.41 | 8.87  | 7.43 | 8.06  | 7.8   | 8.22  | 8.4   | 8.23  |
| 4.42 | 4.47 | 4.8   | 4.13 | 4.33  | 4.52  | 4.3   | 4.04  | 3.88  |
| 2.58 | 2.39 | 2.3   | 2.31 | 2.28  | 2.61  | 2.46  | 2.14  | 2.58  |
| 2.11 | 2.08 | 4.15  | 2.12 | 2.19  | 2.23  | 3.06  | 2.06  | 2.61  |
| 5.63 | 5.97 | 5.11  | 5.47 | 6.83  | 4.62  | 5.13  | 4.3   | 5.45  |
| 7.41 | 7.44 | 7.07  | 7.98 | 7.85  | 7.17  | 7.4   | 7.48  | 7.7   |
| 1.89 | 2.25 | 1.96  | 2.26 | 2.15  | 2.83  | 2.48  | 1.87  | 2.32  |
| 2.51 | 2.06 | 2.34  | 2.34 | 1.87  | 2.19  | 4.65  | 2.35  | 2.13  |
| 9.87 | 9.96 | 10.05 | 9.39 | 10.19 | 10.34 | 10.01 | 11.49 | 11.02 |
| 5.31 | 5.72 | 4.72  | 5.45 | 6.16  | 6.43  | 4.67  | 5.3   | 5.59  |
| 8.45 | 8.27 | 10.05 | 8.76 | 7.76  | 9.57  | 8.5   | 8.47  | 8.44  |
| 1.53 | 1.44 | 1.72  | 1.7  | 1.33  | 1.78  | 1.69  | 3.76  | 1.32  |
| 1.56 | 1.39 | 1.71  | 1.87 | 1.6   | 1.78  | 1.99  | 1.66  | 1.97  |
| 8.97 | 6.85 | 7.47  | 7.75 | 10.08 | 9.03  | 8.76  | 10.09 | 9.51  |
| 8.61 | 9.16 | 9.23  | 9.37 | 7.84  | 9.3   | 8.39  | 7.87  | 8.22  |
| 2.07 | 1.94 | 2.34  | 1.99 | 2.91  | 1.81  | 2.27  | 1.69  | 1.76  |
| 2.89 | 2.68 | 2.74  | 3.77 | 3.77  | 2.82  | 3.1   | 2.37  | 3.18  |
| 2.57 | 3.22 | 4     | 4.21 | 3.44  | 3.15  | 3.4   | 3.15  | 2.6   |
| 5.81 | 4.51 | 5.57  | 3.9  | 6.89  | 4.5   | 5.86  | 5.65  | 4.89  |
| 1.7  | 1.67 | 1.72  | 1.66 | 1.64  | 1.75  | 2.01  | 1.87  | 1.62  |
| 2.2  | 2.97 | 2.49  | 3.49 | 2.4   | 2.75  | 2.1   | 3.07  | 2.76  |
| 9.03 | 8.76 | 6.95  | 8.16 | 5.58  | 6.57  | 8.11  | 7.5   | 7     |
| 2.86 | 2.69 | 3.48  | 3.57 | 3.09  | 4.11  | 4     | 3.97  | 3.6   |
| 4.75 | 5.46 | 5.68  | 5.14 | 5.21  | 4.98  | 5.29  | 3.12  | 4.58  |
| 1.87 | 1.71 | 2.07  | 1.83 | 1.33  | 1.63  | 1.9   | 1.8   | 2.19  |

|      |      |       |      |       |      |      |       |      |
|------|------|-------|------|-------|------|------|-------|------|
| 3.34 | 3.45 | 4.37  | 3.83 | 2.69  | 2.96 | 3.17 | 2.57  | 3.61 |
| 1.64 | 2.65 | 2.87  | 1.93 | 2.1   | 2.08 | 2.48 | 1.58  | 1.5  |
| 2.21 | 3.02 | 2.61  | 3.35 | 4.98  | 2.08 | 2.59 | 2.66  | 2.84 |
| 2.31 | 2.84 | 1.89  | 3.03 | 4.3   | 2.67 | 2.73 | 2.36  | 2.65 |
| 1.83 | 1.62 | 2.5   | 1.27 | 1.51  | 1.63 | 1.79 | 1.42  | 1.8  |
| 2.17 | 2.08 | 2.11  | 1.89 | 1.62  | 1.83 | 1.66 | 1.69  | 1.8  |
| 3.81 | 2.16 | 2.34  | 4.74 | 2.1   | 3.9  | 4.24 | 2.4   | 2.04 |
| 2.31 | 2.27 | 2.22  | 2.33 | 2.16  | 2.56 | 2.55 | 3.11  | 2.17 |
| 5.07 | 4.97 | 5.56  | 6    | 6.2   | 4.83 | 4.71 | 5.42  | 5.35 |
| 2.15 | 2.07 | 2.68  | 3.27 | 2.25  | 2.78 | 2.62 | 2.08  | 2.63 |
| 7.01 | 7.56 | 6.96  | 6.68 | 7.35  | 7.82 | 7.57 | 8.11  | 8.22 |
| 1.39 | 1.45 | 1.61  | 1.49 | 1.44  | 1.63 | 1.99 | 2.64  | 1.4  |
| 4    | 3.55 | 2.63  | 4.15 | 2.91  | 3.83 | 3.8  | 4.64  | 5.43 |
| 8.88 | 7.18 | 6.34  | 6.57 | 9.6   | 7.65 | 8.05 | 9.49  | 9.28 |
| 5.32 | 7.07 | 5.23  | 7.07 | 6.91  | 7.05 | 7.23 | 7.04  | 6.97 |
| 6.84 | 4.68 | 4.4   | 6.26 | 5.69  | 4.59 | 7.36 | 4.65  | 6.51 |
| 7.55 | 5.3  | 3.34  | 7.2  | 5.73  | 6.67 | 5.39 | 7.6   | 7.42 |
| 9.47 | 6.95 | 6.02  | 7.56 | 10.01 | 8.23 | 8.16 | 9.72  | 9.1  |
| 3.86 | 3.4  | 3.37  | 4.14 | 2.57  | 2.47 | 3.55 | 3.88  | 5.8  |
| 1.59 | 2.14 | 2.52  | 1.88 | 1.85  | 1.67 | 2.38 | 2.74  | 1.91 |
| 9.9  | 9.88 | 10.12 | 9.63 | 10.17 | 9.49 | 9.69 | 10.21 | 9.3  |
| 7.16 | 7.25 | 7.04  | 6.39 | 6.61  | 6.37 | 7.17 | 5.95  | 6.07 |
| 6.23 | 6.12 | 6.95  | 7.06 | 6.83  | 6.81 | 6.54 | 6.71  | 6.37 |
| 2.65 | 1.9  | 2.48  | 3.33 | 1.68  | 3.29 | 2.04 | 2.94  | 3.82 |
| 4.95 | 4.06 | 5.79  | 5.95 | 5.15  | 5.08 | 6.28 | 6.81  | 5.7  |
| 3.43 | 2.78 | 2.81  | 2.68 | 3.17  | 3.15 | 3.03 | 2.93  | 3.01 |
| 6.18 | 6.48 | 4.52  | 6.71 | 6.14  | 5.78 | 6.14 | 6.48  | 4.96 |
| 1.74 | 1.74 | 1.88  | 1.58 | 1.83  | 2.02 | 1.57 | 1.48  | 1.96 |
| 7.29 | 7.04 | 7.86  | 4.74 | 7.73  | 8.16 | 8.31 | 7.7   | 6.86 |
| 3.29 | 4.94 | 6.12  | 4.53 | 5.81  | 5.43 | 4.89 | 5.16  | 4.88 |
| 4.63 | 4.6  | 4.52  | 4.41 | 5.12  | 4.1  | 4.62 | 5.04  | 4.64 |
| 4.13 | 4.24 | 3.77  | 3.84 | 3.3   | 4.18 | 4.61 | 4.79  | 4.99 |
| 2.04 | 2.21 | 2.15  | 2.08 | 1.82  | 1.75 | 1.77 | 1.99  | 1.78 |
| 3.72 | 3.58 | 4.6   | 4.03 | 3.47  | 4.43 | 3.54 | 3.76  | 4.1  |
| 6.65 | 6.56 | 7.6   | 6.16 | 6.38  | 7.03 | 6.64 | 6.29  | 6.15 |
| 3.19 | 2.16 | 1.98  | 2.8  | 2.15  | 2.39 | 2.37 | 2.27  | 2.83 |
| 4.31 | 4.1  | 3.61  | 4.6  | 3.79  | 4    | 4.35 | 3.9   | 3.93 |
| 7.28 | 7.9  | 8.55  | 6.9  | 7.22  | 7.16 | 7.44 | 6.28  | 7.8  |
| 3.25 | 4.21 | 3.81  | 4.68 | 3.16  | 3.36 | 3.29 | 3.94  | 3.29 |
| 2.59 | 2.77 | 2.13  | 3.19 | 2.98  | 2.47 | 3.16 | 2.17  | 2.55 |
| 2.19 | 2.35 | 1.62  | 2.27 | 1.93  | 2.02 | 2.23 | 2.28  | 1.97 |
| 1.87 | 2.13 | 1.97  | 2.59 | 1.87  | 2    | 2.02 | 2.41  | 1.98 |
| 5.33 | 5.7  | 4.7   | 5.4  | 6.41  | 6.24 | 4.75 | 6.01  | 5.07 |
| 3.56 | 3.16 | 4.15  | 3.62 | 2.75  | 5.65 | 3.63 | 3.06  | 4.61 |
| 1.93 | 2.07 | 1.98  | 1.89 | 1.91  | 1.97 | 2.29 | 1.7   | 1.83 |
| 2.98 | 7.76 | 2.9   | 2.77 | 6.46  | 3.46 | 7.22 | 5.88  | 4.57 |
| 3.52 | 3.52 | 3.22  | 2.77 | 2.98  | 3.3  | 2.91 | 3.11  | 3.39 |
| 2.57 | 2.01 | 3.61  | 3.57 | 1.93  | 2.56 | 5.68 | 3.83  | 3.4  |
| 7.15 | 7.23 | 6.57  | 6.88 | 7.46  | 7.43 | 7.29 | 6.66  | 6.53 |
| 3.4  | 4.11 | 3.59  | 2.63 | 5.23  | 4.33 | 4.15 | 4.38  | 3.27 |
| 1.99 | 2.1  | 2.08  | 2.98 | 2.29  | 1.9  | 2.19 | 2.14  | 1.66 |
| 1.96 | 2.16 | 1.89  | 2.19 | 2.73  | 2.71 | 2.2  | 2.18  | 2.45 |

|      |      |      |      |      |      |      |      |      |
|------|------|------|------|------|------|------|------|------|
| 2.34 | 2.52 | 1.9  | 2.16 | 1.96 | 1.91 | 2.05 | 2    | 1.7  |
| 1.7  | 1.6  | 1.56 | 1.7  | 1.58 | 1.41 | 1.41 | 1.41 | 1.34 |
| 2.1  | 2.36 | 2.33 | 2.58 | 2.29 | 2.29 | 2.34 | 2.38 | 2.02 |
| 7.4  | 6.98 | 8.61 | 7.94 | 7.95 | 7.89 | 8.22 | 6.87 | 8.15 |
| 2.24 | 3.01 | 2.94 | 3.3  | 4.38 | 6.72 | 2.47 | 2.05 | 2.35 |
| 7.03 | 7.53 | 8.09 | 6.92 | 7.97 | 7.79 | 7.55 | 7.85 | 8.28 |
| 2.87 | 3.46 | 2.82 | 2.82 | 3.46 | 3.46 | 3.07 | 3.48 | 2.94 |
| 5.32 | 3.59 | 2.99 | 3.62 | 4.44 | 3.44 | 5.36 | 3.78 | 3.04 |
| 9.39 | 9.64 | 8.81 | 8.3  | 8.79 | 9.23 | 8.9  | 8.6  | 8.92 |
| 1.71 | 1.86 | 2.65 | 2.18 | 3.13 | 2.64 | 1.91 | 2.47 | 1.97 |
| 1.76 | 1.79 | 2.12 | 1.75 | 1.34 | 1.99 | 1.49 | 1.59 | 1.66 |
| 2.47 | 2.09 | 2.64 | 2.24 | 1.99 | 2.87 | 2.19 | 2.33 | 2.16 |
| 1.92 | 1.62 | 2.4  | 1.84 | 2.24 | 1.76 | 1.79 | 1.87 | 2.4  |
| 6.18 | 7.01 | 6.71 | 5.66 | 7.44 | 5.59 | 6.43 | 6.44 | 5.91 |
| 1.93 | 2.82 | 2.45 | 2.06 | 1.74 | 1.89 | 1.84 | 2.19 | 2.15 |
| 3.69 | 4.49 | 4.9  | 2.79 | 5.91 | 4.77 | 4.1  | 4.7  | 4.78 |
| 4.87 | 6.78 | 7.38 | 7.92 | 6.51 | 6.6  | 6.71 | 7.39 | 5.69 |
| 1.6  | 1.47 | 1.7  | 1.66 | 1.67 | 1.63 | 1.5  | 1.56 | 1.54 |
| 2.65 | 4.3  | 3.21 | 3.45 | 2.91 | 3.01 | 2.66 | 3.22 | 3.14 |
| 1.73 | 1.48 | 1.52 | 1.58 | 1.29 | 1.79 | 1.57 | 3.68 | 1.61 |
| 1.96 | 2.02 | 2.15 | 1.8  | 1.69 | 1.83 | 1.84 | 1.8  | 2.06 |
| 1.99 | 1.64 | 1.66 | 2.29 | 1.16 | 1.76 | 1.56 | 1.52 | 1.95 |
| 6.54 | 4.55 | 5.73 | 6.48 | 4.63 | 7.56 | 6.62 | 6.53 | 8.37 |
| 2.84 | 2.63 | 2.84 | 2.35 | 2.26 | 2.28 | 2.6  | 2.12 | 2.19 |

| X191  | X287  | X288  | X192  | X193  | X194 | X335  | X347  | X411  |
|-------|-------|-------|-------|-------|------|-------|-------|-------|
| 5     | 5     | 5     | 6     | 6     | 6    | 6     | 6     | 6     |
| 2.27  | 3.28  | 1.41  | 1.29  | 1.43  | 1.85 | 1.87  | 1.64  | 1.57  |
| 5.56  | 7.1   | 7.17  | 7.77  | 6.93  | 6.72 | 6.64  | 6.8   | 6.9   |
| 1.58  | 1.84  | 1.71  | 1.85  | 1.62  | 1.59 | 1.84  | 1.87  | 1.82  |
| 6.25  | 5.87  | 6.07  | 7.5   | 4.87  | 6.41 | 6.04  | 7.38  | 7.34  |
| 7.36  | 6.76  | 7.66  | 7.66  | 8.07  | 8.08 | 5.68  | 6.63  | 6.99  |
| 6.35  | 4.49  | 3.71  | 5.39  | 4.57  | 6.43 | 4.84  | 4.64  | 3.18  |
| 7.1   | 6.87  | 7.02  | 7.41  | 7.18  | 7.63 | 7.91  | 7.86  | 6.98  |
| 2.71  | 1.96  | 1.97  | 3.02  | 1.96  | 2.91 | 1.66  | 1.38  | 2.16  |
| 8.39  | 7.78  | 6.75  | 6.42  | 7.12  | 7.92 | 6.07  | 6.81  | 6.74  |
| 5.2   | 7.32  | 7.38  | 5.25  | 5.36  | 4.52 | 5.31  | 5.27  | 5.19  |
| 3.88  | 3.54  | 4.08  | 3.7   | 3.18  | 3.88 | 5     | 4.74  | 3.08  |
| 4.91  | 7.19  | 9.67  | 9.08  | 5.9   | 8.79 | 9.48  | 9.67  | 6.53  |
| 2.2   | 2.71  | 4.5   | 3.7   | 3.25  | 2.82 | 3.1   | 3.93  | 2.96  |
| 2.41  | 2.17  | 2.36  | 2.38  | 2.36  | 2.41 | 1.99  | 2.3   | 2.11  |
| 3.75  | 4.9   | 3.4   | 2.97  | 3.38  | 3.54 | 3.57  | 3.07  | 3.44  |
| 2.57  | 3.34  | 4.65  | 4.34  | 4.21  | 2.52 | 3.47  | 4.34  | 4.54  |
| 1.58  | 1.66  | 2.23  | 1.6   | 1.98  | 1.43 | 1.86  | 1.75  | 1.82  |
| 3.1   | 5.31  | 2.29  | 2.33  | 3.73  | 2.37 | 3.38  | 3.14  | 3.66  |
| 5.71  | 6.34  | 5.26  | 5.78  | 5.91  | 5.65 | 6.32  | 3.74  | 6.93  |
| 2.4   | 3.29  | 2.42  | 2.45  | 2.95  | 2.35 | 2.61  | 2.11  | 2.4   |
| 5.48  | 5.89  | 4.32  | 6.78  | 6.11  | 6.45 | 5.82  | 7.06  | 6.66  |
| 2.96  | 3.19  | 2.18  | 2.13  | 2.15  | 2.19 | 2.13  | 2.37  | 2.21  |
| 3.74  | 4.74  | 2.36  | 3.43  | 4.79  | 3.83 | 2.65  | 2.22  | 3.13  |
| 7.04  | 7     | 7.69  | 6.65  | 7.14  | 7.35 | 6.27  | 4.1   | 6.22  |
| 4.57  | 5.42  | 4.36  | 4.51  | 4.37  | 4.86 | 5     | 4.8   | 7.2   |
| 8.77  | 7.51  | 8.13  | 10.79 | 4.62  | 7.51 | 7.53  | 8.33  | 7.4   |
| 4.03  | 4.11  | 5.95  | 4.94  | 2.64  | 3.99 | 3.54  | 3.22  | 3.74  |
| 12.01 | 13.15 | 11.73 | 13.03 | 12.67 | 11.5 | 12    | 11.83 | 11.87 |
| 4.96  | 3.89  | 5.54  | 5.91  | 3.73  | 3.91 | 3.01  | 4.02  | 4.68  |
| 2.79  | 3.73  | 3.69  | 3.62  | 2.67  | 2.99 | 2.77  | 2.82  | 3.75  |
| 6.2   | 3.44  | 3.97  | 5.76  | 6.67  | 5.85 | 6.73  | 5.02  | 7.4   |
| 9.47  | 8.27  | 10.61 | 10.33 | 8.17  | 8.38 | 9.3   | 6.73  | 9.05  |
| 2.54  | 2.64  | 2.34  | 2.7   | 2.66  | 2.3  | 2.21  | 1.92  | 2.57  |
| 2.89  | 2.4   | 2.24  | 2.36  | 2.24  | 2.9  | 2.2   | 2.69  | 3.15  |
| 2.83  | 2.53  | 5.13  | 3.2   | 5.65  | 2.94 | 2.02  | 2.29  | 3.21  |
| 7.45  | 5.66  | 8.48  | 8.4   | 6.31  | 5.7  | 7.95  | 5.05  | 6.96  |
| 12.05 | 11.25 | 10.65 | 12.54 | 10.79 | 11   | 11.04 | 12.07 | 11.04 |
| 2.46  | 1.86  | 2.37  | 1.97  | 2.51  | 2.1  | 2.31  | 2.29  | 2.09  |
| 3.63  | 2.69  | 2.28  | 2.14  | 2.49  | 2.12 | 2.62  | 2.42  | 1.9   |
| 2.85  | 2.11  | 2.84  | 2.65  | 1.93  | 2.8  | 2.3   | 2.39  | 2.57  |
| 6.66  | 3.19  | 4.02  | 4.5   | 3.39  | 5.88 | 3.06  | 4.83  | 2.88  |
| 8.82  | 7.97  | 8.5   | 7.9   | 7.96  | 9.01 | 7.92  | 7.54  | 7.43  |
| 2.06  | 2.95  | 1.92  | 1.8   | 1.83  | 1.99 | 2.34  | 2.35  | 2.34  |
| 2.74  | 3.25  | 2.72  | 3.2   | 3.67  | 2.84 | 3.38  | 2.15  | 3.22  |
| 4.64  | 6.13  | 6.12  | 4.58  | 3.08  | 3.39 | 3.93  | 6.32  | 4.43  |
| 4.12  | 2.45  | 4.17  | 3.29  | 3.94  | 4.32 | 3.33  | 2.93  | 3.65  |
| 4.9   | 4.97  | 4.5   | 4.55  | 5.14  | 5.13 | 5.26  | 6.6   | 4.75  |
| 2.45  | 3.61  | 2.45  | 2.01  | 3.42  | 2.16 | 2.56  | 2.47  | 2.28  |
| 2.81  | 3.05  | 4.22  | 3.2   | 2.3   | 3.74 | 2.75  | 2.93  | 2.08  |
| 1.91  | 4.53  | 6.74  | 2.42  | 2.98  | 1.72 | 1.73  | 1.61  | 2.67  |

|       |      |      |      |      |       |      |      |      |
|-------|------|------|------|------|-------|------|------|------|
| 1.97  | 2.27 | 2.2  | 1.9  | 1.63 | 1.83  | 2.18 | 1.95 | 1.88 |
| 2.54  | 3.06 | 4.25 | 2.46 | 2.74 | 2.37  | 2.91 | 2.49 | 2.69 |
| 3.9   | 3.72 | 3.5  | 3.66 | 3.02 | 2.24  | 2.77 | 3.35 | 2.85 |
| 3.36  | 4.25 | 3.46 | 5.31 | 4.15 | 4.05  | 3.51 | 3.4  | 3.77 |
| 3.24  | 3.22 | 3.11 | 2.86 | 2.73 | 4.26  | 4.05 | 2.7  | 3.86 |
| 1.77  | 1.68 | 1.72 | 1.73 | 1.51 | 1.77  | 1.85 | 1.74 | 1.83 |
| 5.56  | 6.03 | 5.16 | 4.63 | 4.52 | 6.52  | 4.92 | 2.95 | 3.81 |
| 5.97  | 6.38 | 5.15 | 6.03 | 5.05 | 4.94  | 4.45 | 3.45 | 5.68 |
| 2.95  | 3.25 | 3.4  | 3.53 | 2.77 | 2.7   | 2.91 | 2.98 | 2.88 |
| 8.52  | 7.77 | 9.72 | 8.53 | 8.15 | 9.08  | 9.4  | 7.99 | 8.3  |
| 8.28  | 8.81 | 8.07 | 8.16 | 6.69 | 8.33  | 6    | 4.09 | 7.71 |
| 2.85  | 7.8  | 6.16 | 3.42 | 5.15 | 4.42  | 3.61 | 4.29 | 2.41 |
| 5.91  | 1.19 | 3.52 | 8.05 | 2.73 | 4.75  | 6.11 | 6.94 | 7.45 |
| 7.96  | 8.67 | 9.39 | 8.23 | 9.1  | 8.41  | 8.41 | 8.82 | 8.85 |
| 5.79  | 5.67 | 6.86 | 6.28 | 6.17 | 6.4   | 5.57 | 6.07 | 7.42 |
| 2.36  | 2.32 | 2.09 | 2.15 | 2.2  | 2.27  | 2.38 | 2.67 | 2.35 |
| 7.43  | 6.33 | 7.66 | 7.62 | 3.81 | 8.51  | 7.57 | 7.07 | 6.64 |
| 7.8   | 8.53 | 5.89 | 7.69 | 7.32 | 7.57  | 8    | 8.23 | 7.47 |
| 1.89  | 1.48 | 2.07 | 1.64 | 1.76 | 1.84  | 1.66 | 2.3  | 1.52 |
| 4.25  | 4.01 | 4.3  | 5.67 | 4.85 | 5.36  | 3.34 | 3.83 | 3.72 |
| 1.78  | 1.83 | 1.66 | 1.94 | 1.96 | 1.76  | 1.87 | 2.19 | 1.77 |
| 1.62  | 1.7  | 1.78 | 1.56 | 1.35 | 1.47  | 1.71 | 1.55 | 1.81 |
| 4.01  | 1.8  | 1.89 | 2.34 | 1.71 | 2.8   | 2.07 | 1.51 | 1.72 |
| 3.34  | 3.43 | 4.7  | 3.75 | 4.85 | 3.09  | 4.46 | 4.01 | 3.98 |
| 3.65  | 2.72 | 2.63 | 3.11 | 3.78 | 3.63  | 4.06 | 3.47 | 3.7  |
| 1.73  | 1.45 | 1.74 | 1.43 | 1.77 | 1.45  | 1.5  | 1.48 | 1.69 |
| 2.81  | 2.51 | 2.76 | 2.35 | 2.17 | 2.3   | 2.58 | 2.65 | 2.67 |
| 7.74  | 8.02 | 7.64 | 8.05 | 8.27 | 7.95  | 7.96 | 7.14 | 7.73 |
| 4.4   | 4.21 | 4.02 | 4.31 | 3.85 | 3.99  | 4.31 | 4.18 | 4.73 |
| 2.43  | 2.49 | 2.4  | 2.25 | 2.35 | 2.36  | 2.4  | 2.75 | 2.86 |
| 3.06  | 2.83 | 2.44 | 2.14 | 2.27 | 2.19  | 2.81 | 3.33 | 2.73 |
| 7.03  | 6.51 | 7.24 | 6.35 | 5.5  | 7.04  | 2.92 | 2.56 | 4.2  |
| 6.94  | 5.41 | 6.4  | 7.62 | 5.8  | 7.9   | 5.66 | 5.93 | 6.96 |
| 1.98  | 2.18 | 1.9  | 2.61 | 2.13 | 2.04  | 1.89 | 2.1  | 2.24 |
| 2.56  | 2.66 | 3.57 | 2.92 | 2.23 | 2.39  | 2    | 2.03 | 2.47 |
| 10.83 | 9.93 | 9.39 | 8.71 | 8.51 | 10.29 | 8.99 | 7.89 | 8.69 |
| 5     | 5.83 | 5.25 | 6.38 | 5.36 | 4.13  | 4.32 | 3.75 | 5.25 |
| 9     | 9.69 | 9.33 | 9.09 | 8.55 | 9.31  | 8.64 | 7.75 | 8.61 |
| 1.46  | 2.22 | 1.63 | 1.39 | 1.4  | 1.64  | 1.64 | 1.56 | 1.46 |
| 1.68  | 1.7  | 1.91 | 1.74 | 1.52 | 1.54  | 1.54 | 1.81 | 1.75 |
| 9.75  | 7.89 | 5.98 | 7.25 | 5.52 | 7.31  | 6.03 | 4.52 | 9.01 |
| 8.03  | 7.4  | 8.23 | 8.4  | 8.74 | 6.59  | 8.73 | 9.87 | 7.82 |
| 2.09  | 2.26 | 2.34 | 1.98 | 1.91 | 1.93  | 1.86 | 2.2  | 2.04 |
| 2.54  | 3.05 | 2.43 | 3.89 | 3.32 | 3.15  | 2.66 | 2.77 | 2.88 |
| 4.31  | 3.3  | 8.56 | 5.77 | 7.05 | 6.02  | 3.55 | 2.69 | 3.34 |
| 5.11  | 4.49 | 5.38 | 4.23 | 6.05 | 5.98  | 3.76 | 4.22 | 5.05 |
| 1.6   | 1.72 | 1.56 | 1.49 | 1.58 | 1.69  | 1.74 | 1.6  | 1.66 |
| 2.64  | 4.43 | 4.85 | 2.54 | 2.68 | 2.6   | 2.22 | 3.07 | 4.56 |
| 7.6   | 8.68 | 7.82 | 8.23 | 6.51 | 6.4   | 8.74 | 8.62 | 9.46 |
| 2.44  | 2.77 | 3    | 2.29 | 5.24 | 1.95  | 2.33 | 2.49 | 2.61 |
| 4.8   | 5.57 | 5.12 | 5.75 | 5.03 | 5.37  | 4.23 | 3.93 | 4.7  |
| 1.81  | 3.26 | 3.19 | 1.64 | 1.53 | 1.79  | 1.55 | 1.74 | 1.79 |

|      |      |      |      |       |      |      |       |      |
|------|------|------|------|-------|------|------|-------|------|
| 2.53 | 4.48 | 5.28 | 3.27 | 3.64  | 2.85 | 3.04 | 4.51  | 3    |
| 2.17 | 2.48 | 2.81 | 2.46 | 5.16  | 2.17 | 2.03 | 1.68  | 1.77 |
| 4.34 | 1.79 | 1.55 | 2.17 | 1.75  | 2.73 | 1.94 | 2.05  | 1.98 |
| 2.49 | 6.54 | 2.93 | 2.38 | 2.3   | 2.2  | 2.27 | 2.53  | 2.27 |
| 1.66 | 2.03 | 1.69 | 1.23 | 1.33  | 1.46 | 1.64 | 1.73  | 1.43 |
| 1.69 | 2.02 | 1.8  | 1.75 | 2.01  | 1.63 | 2.24 | 3.02  | 1.82 |
| 3.04 | 2.15 | 2.18 | 6.35 | 2.42  | 1.9  | 2.81 | 2.75  | 1.92 |
| 1.93 | 2.38 | 2.4  | 2.3  | 1.88  | 1.68 | 2.11 | 2.25  | 2.13 |
| 5.46 | 4.96 | 4.28 | 4.52 | 6.72  | 5.38 | 4.71 | 5.93  | 4.21 |
| 2.35 | 1.96 | 2.21 | 2.79 | 2.51  | 3.79 | 1.9  | 2     | 1.92 |
| 7.41 | 6.43 | 6.3  | 7.69 | 7.07  | 7.1  | 7.67 | 5.15  | 6.82 |
| 1.55 | 1.68 | 1.46 | 1.84 | 1.6   | 1.64 | 1.56 | 1.52  | 1.51 |
| 2.81 | 4.19 | 3.38 | 3.03 | 5.56  | 2.22 | 2.79 | 2.26  | 1.96 |
| 9.37 | 8.31 | 6.85 | 6.24 | 5.74  | 4.77 | 5.35 | 4.68  | 8.88 |
| 6.48 | 6.16 | 6.67 | 7.17 | 6.48  | 7.11 | 6.69 | 6.97  | 6.48 |
| 4.78 | 2.74 | 3.17 | 7.29 | 6.07  | 5.34 | 4.74 | 4.23  | 5.07 |
| 3.37 | 4.56 | 6.96 | 8.4  | 6.29  | 4.56 | 7.08 | 9.09  | 5.46 |
| 9.36 | 7.72 | 5.19 | 6.41 | 4.48  | 5.64 | 5.86 | 4.66  | 9.28 |
| 2.87 | 3.32 | 1.96 | 2.6  | 2.07  | 2.66 | 3.44 | 2.47  | 3.49 |
| 3.03 | 3.15 | 2.89 | 3.7  | 4.82  | 1.97 | 1.66 | 1.5   | 2.37 |
| 9.7  | 9.22 | 8.88 | 9.71 | 10.23 | 10.1 | 9.7  | 10.31 | 9.86 |
| 7.11 | 4.29 | 5.6  | 7.69 | 5.86  | 7.5  | 5.62 | 4.45  | 5.56 |
| 6.43 | 4.93 | 5.93 | 6.92 | 6.88  | 7.63 | 8.62 | 7.12  | 6.57 |
| 3.48 | 4.05 | 5.58 | 3.67 | 1.57  | 2.18 | 2.29 | 2.01  | 2.64 |
| 5.2  | 6.28 | 4.83 | 6.62 | 4.38  | 7.18 | 3.98 | 3.67  | 4.83 |
| 2.64 | 2.93 | 3.25 | 3.05 | 3.28  | 3.04 | 3.21 | 3.06  | 2.95 |
| 6.57 | 4.51 | 5.43 | 5.42 | 5.53  | 6.68 | 6.67 | 6.27  | 5.34 |
| 1.57 | 1.46 | 2.23 | 1.74 | 1.59  | 1.45 | 1.89 | 1.68  | 1.6  |
| 7.99 | 7.05 | 6.01 | 5.15 | 6.13  | 7.24 | 7.24 | 6.74  | 6.46 |
| 5.07 | 4.12 | 4.54 | 5.04 | 4.8   | 5.4  | 4.03 | 4.26  | 4.83 |
| 4.33 | 4.63 | 4.22 | 3.9  | 4.27  | 4.2  | 5.12 | 4.85  | 5.91 |
| 4.41 | 3.12 | 4.67 | 4.94 | 3.96  | 3.73 | 4.49 | 4.48  | 4.35 |
| 2.3  | 2.4  | 3    | 1.96 | 2.18  | 2.22 | 2.21 | 2.51  | 2.14 |
| 3.96 | 4.47 | 5.6  | 3.9  | 4.27  | 4.58 | 3.99 | 4.43  | 3.53 |
| 6.47 | 6.76 | 5.84 | 6.45 | 7.43  | 6.66 | 6.78 | 6.64  | 6.7  |
| 2.16 | 2.91 | 3.51 | 2.71 | 3.81  | 1.7  | 2.5  | 2.91  | 2.75 |
| 3.55 | 4.5  | 4.09 | 3.86 | 4.4   | 3.24 | 4.47 | 7.3   | 4.02 |
| 7.45 | 7.36 | 7.66 | 6.69 | 7.97  | 7.38 | 7.97 | 8.55  | 6.34 |
| 3.47 | 3.92 | 4.07 | 3.97 | 4.21  | 4.41 | 2.91 | 3.54  | 3.52 |
| 2.59 | 3.33 | 2.44 | 2.61 | 2.31  | 2.01 | 2.12 | 2.29  | 2.57 |
| 2.05 | 1.85 | 2.09 | 2.32 | 2.19  | 2.1  | 2.39 | 2.04  | 2.56 |
| 1.99 | 2.56 | 2.14 | 1.95 | 2.08  | 2.08 | 2.26 | 2.2   | 1.88 |
| 5.2  | 4.06 | 4.19 | 3.86 | 4.86  | 4.7  | 6.41 | 4.77  | 5.45 |
| 3.73 | 3.86 | 7.06 | 3.83 | 4.75  | 5.45 | 3.74 | 4.76  | 3.1  |
| 1.7  | 1.8  | 1.86 | 2.07 | 2.18  | 2.01 | 2.06 | 2.14  | 1.97 |
| 7.67 | 7.76 | 2.65 | 7.87 | 8.61  | 8.49 | 7.89 | 6.56  | 7.87 |
| 3.13 | 3.32 | 2.89 | 3.58 | 3.18  | 3.3  | 3.52 | 3.79  | 3.44 |
| 3.57 | 3.17 | 2.73 | 3.75 | 2.39  | 3.1  | 2.29 | 2.29  | 2.3  |
| 6.62 | 6.23 | 5.23 | 7.33 | 7.08  | 6.89 | 6.65 | 7.31  | 7.25 |
| 4.21 | 3.16 | 2.9  | 4.4  | 2.99  | 4.59 | 3.24 | 3.38  | 4.84 |
| 2.38 | 2.47 | 2.93 | 1.97 | 2.71  | 2.29 | 2.29 | 1.93  | 2.62 |
| 2.32 | 3.99 | 2.11 | 2.22 | 1.9   | 1.69 | 2.11 | 2.15  | 2.02 |

|      |      |      |      |      |      |      |      |      |
|------|------|------|------|------|------|------|------|------|
| 1.88 | 2.4  | 2.7  | 2.01 | 2.21 | 1.62 | 2.4  | 2.54 | 1.86 |
| 1.3  | 1.5  | 1.45 | 1.39 | 1.78 | 1.45 | 1.79 | 1.63 | 1.53 |
| 2.15 | 2.6  | 2.32 | 2.07 | 3.1  | 2.31 | 2.32 | 2.27 | 2.51 |
| 8.12 | 8.01 | 8.21 | 7.52 | 6.68 | 8.38 | 7.29 | 7.79 | 6.6  |
| 3.39 | 2.86 | 4.81 | 2.62 | 2.88 | 3.09 | 1.94 | 1.64 | 2.54 |
| 7.81 | 7.35 | 8.14 | 6.92 | 6.87 | 7.54 | 7.21 | 7.61 | 7.2  |
| 2.8  | 2.98 | 4.04 | 3.11 | 3.06 | 3.35 | 3.08 | 3.39 | 3.56 |
| 2.73 | 2.93 | 4.76 | 5.29 | 3.91 | 3.53 | 2.95 | 2.95 | 3.09 |
| 8.75 | 9.27 | 9.73 | 8.5  | 8.17 | 8.58 | 9.41 | 9.08 | 9.32 |
| 2.54 | 2.13 | 1.79 | 2.83 | 2.34 | 3.16 | 1.65 | 1.58 | 1.72 |
| 2.27 | 2    | 2.44 | 1.83 | 2.03 | 1.89 | 1.73 | 1.57 | 1.7  |
| 2.49 | 2.7  | 2.64 | 1.71 | 2.47 | 2.56 | 2.34 | 2.19 | 1.99 |
| 2.1  | 2.33 | 2.02 | 2.28 | 2.35 | 2.1  | 1.77 | 1.68 | 1.81 |
| 6.96 | 5.77 | 5.49 | 6.77 | 7.22 | 7.65 | 4.94 | 4.26 | 6.66 |
| 2.06 | 1.7  | 2.2  | 2.69 | 2.16 | 2.41 | 1.87 | 1.75 | 2.01 |
| 3.09 | 3.32 | 1.93 | 4.22 | 6.08 | 3.29 | 4.2  | 4.25 | 3.64 |
| 5.53 | 4.39 | 3.29 | 6.58 | 6.48 | 6.48 | 8.57 | 4.09 | 7.2  |
| 1.7  | 1.54 | 2.05 | 1.53 | 1.56 | 1.53 | 1.85 | 1.57 | 1.54 |
| 3.58 | 3.75 | 4.87 | 3.85 | 2.35 | 3.36 | 4.32 | 3.71 | 2.63 |
| 1.39 | 1.53 | 1.58 | 1.45 | 1.63 | 1.54 | 1.4  | 1.28 | 1.38 |
| 1.91 | 2.35 | 2.04 | 1.86 | 2.21 | 1.82 | 2.28 | 2.37 | 1.95 |
| 1.9  | 2.34 | 2.22 | 2.27 | 1.96 | 1.72 | 1.89 | 2.09 | 1.92 |
| 5.15 | 8.35 | 6.96 | 5.45 | 8.16 | 3.5  | 6.87 | 4.04 | 5.28 |
| 2.77 | 2.37 | 2.9  | 2.04 | 4.23 | 2.62 | 2.76 | 2.25 | 2.61 |



X447

6  
2.15  
6.61  
2.25  
5.3  
6.88  
4.22  
7.29  
1.83  
6.71  
4.8  
3.46  
8.01  
3.61  
2.18  
2.99  
3.95  
1.44  
2.76  
7.32  
2.36  
5.7  
2.21  
3.18  
5.26  
4.77  
6.8  
3.84  
11.74  
3.43  
2.6  
8.2  
9.64  
1.98  
3.04  
1.89  
7.76  
10.04  
2.41  
1.95  
2.82  
4.01  
7.95  
2.42  
2.19  
3.96  
2.47  
5.02  
2.48  
3.49  
2.07

1.77  
2.65  
3.21  
2.9  
3.03  
1.85  
2.69  
4.5  
2.92  
8.14  
6.07  
2.18  
2.91  
8.84  
7.79  
2.3  
5.4  
7.04  
1.57  
4.24  
2.15  
1.75  
1.8  
3.17  
4.05  
1.44  
2.4  
8.85  
4.45  
2.46  
2.3  
4.84  
7.13  
2.04  
2.29  
4.76  
4.82  
7.65  
1.58  
1.43  
8.44  
8.26  
2.03  
3.35  
2.96  
6.21  
1.63  
2.49  
8.2  
2.75  
3.6  
1.64

2.67  
1.98  
1.69  
2.67  
1.47  
2  
2.48  
2.04  
4.72  
1.72  
6.06  
1.44  
2.85  
8.58  
6.61  
4.84  
4.01  
8.53  
3.83  
2.46  
10.22  
7.2  
4.87  
1.85  
4.81  
3.31  
5.94  
1.47  
6.47  
5.79  
6.12  
3.96  
2.03  
3.3  
5.78  
2.83  
3.76  
7.36  
3.13  
2.64  
2.86  
1.8  
5.07  
2.69  
1.94  
7.1  
3.47  
2.44  
8.38  
5.76  
2.32  
1.79

2.02  
1.43  
2.38  
7.18  
1.97  
7.42  
3.9  
3.75  
9.88  
2.06  
1.55  
2.32  
1.83  
6.37  
1.8  
3.31  
6.32  
1.62  
2.38  
1.59  
2.14  
1.42  
5.12  
2.33
