# Supplementary material
Source: PubMed Central journal article supplement (PMC3077061)
Supplement: NIHMS265571-supplement-18.pdf [file NIHMS265571-supplement-18.pdf]

| <b>Clinical Characteristics of 56 patients for which follow-up is available</b> |                       |                    |                 |         |
|---------------------------------------------------------------------------------|-----------------------|--------------------|-----------------|---------|
|                                                                                 | No PSA fail<br>(N=41) | PSA Fail<br>(N=15) | Total<br>(N=56) | p value |
| <b>Age</b>                                                                      |                       |                    |                 | 0.6701  |
| N                                                                               | 41                    | 15                 | 56              |         |
| Mean (SD)                                                                       | 61.8 (7.56)           | 60.5 (8.05)        | 61.4 (7.64)     |         |
| Median                                                                          | 62.0                  | 62.0               | 62.0            |         |
| Q1, Q3                                                                          | 57.0, 68.0            | 50.0, 68.0         | 56.5, 68.0      |         |
| Range                                                                           | (47.0-74.0)           | (48.0-71.0)        | (47.0-74.0)     |         |
| <b>Fail or follow-up<br/>(months)</b>                                           |                       |                    |                 | <0.0001 |
| N                                                                               | 41                    | 15                 | 56              |         |
| Mean (SD)                                                                       | 51.6 (17.49)          | 17.6 (13.88)       | 42.5 (22.42)    |         |
| Median                                                                          | 49.1                  | 14.1               | 45.2            |         |
| Q1, Q3                                                                          | 43.6, 61.6            | 5.9, 23.0          | 25.5, 55.7      |         |
| Range                                                                           | (0.6-91.5)            | (3.6-45.8)         | (0.6-91.5)      |         |
| <b>Gleason score</b>                                                            |                       |                    |                 | 0.0710  |
| 6                                                                               | 20 (48.8%)            | 4 (26.7%)          | 24 (42.9%)      |         |
| 7                                                                               | 14 (34.1%)            | 4 (26.7%)          | 18 (32.1%)      |         |
| 8_9_10                                                                          | 7 (17.1%)             | 7 (46.7%)          | 14 (25%)        |         |
| <b>Gleason Pattern</b>                                                          |                       |                    |                 | 0.0353  |
| CaGP3                                                                           | 25 (61%)              | 4 (26.7%)          | 29 (51.8%)      |         |
| CaGP4                                                                           | 12 (29.3%)            | 6 (40%)            | 18 (32.1%)      |         |
| CaGP5                                                                           | 4 (9.8%)              | 5 (33.3%)          | 9 (16.1%)       |         |
| <b>p_stage_T</b>                                                                |                       |                    |                 | 0.0636  |
| T2                                                                              | 30 (73.2%)            | 7 (46.7%)          | 37 (66.1%)      |         |
| T3                                                                              | 11 (26.8%)            | 8 (53.3%)          | 19 (33.9%)      |         |
