# Supplementary material
Source: PubMed Central journal article supplement (PMC3077061)
Supplement: NIHMS265571-supplement-19.pdf [file NIHMS265571-supplement-19.pdf]

| ProbeID      | Coeff     | HRatio    | p-value     | UniGene_ID | Gene_Symbol |
|--------------|-----------|-----------|-------------|------------|-------------|
| 1554348_s_at | 1.18562   | 3.27271   | 0.000677987 | Hs.156506  | CDKN2AIPNL  |
| 238853_at    | -0.864418 | 0.421297  | 0.00324631  | Hs.258209  | RAB3IP      |
| 219301_s_at  | -0.597849 | 0.549993  | 0.00422864  | Hs.655684  | CNTNAP2     |
| 222315_at    | -0.803976 | 0.447546  | 0.00802433  | Hs.575983  | ---         |
| 239242_at    | 0.788088  | 2.19919   | 0.00916054  | Hs.632282  | ---         |
| 239045_at    | 1.80313   | 6.06862   | 0.00977344  | Hs.657858  | ---         |
| 217013_at    | -2.30945  | 0.0993154 | 0.0114877   | Hs.568109  | LOC646282   |
| 226064_s_at  | 0.732468  | 2.08021   | 0.0167116   | Hs.334305  | DGAT2       |
| 204942_s_at  | -0.381038 | 0.683152  | 0.0227885   | Hs.87539   | ALDH3B2     |
| 232176_at    | -1.59097  | 0.203727  | 0.0235984   | Hs.525105  | SLITRK6     |
| 242722_at    | -0.51027  | 0.600333  | 0.029724    | Hs.207631  | LMO7        |
| 205968_at    | 0.572348  | 1.77242   | 0.0315015   | Hs.414489  | KCNS3       |
| 205776_at    | -0.309881 | 0.733534  | 0.0365018   | Hs.642706  | FMO5        |
| 217099_s_at  | -0.684686 | 0.504249  | 0.0372802   | Hs.499620  | GEMIN4      |
| 229899_s_at  | -0.550919 | 0.57642   | 0.0413814   | Hs.356766  | C20orf199   |
