# Supplementary material
Source: PubMed Central journal article supplement (PMC3077061)

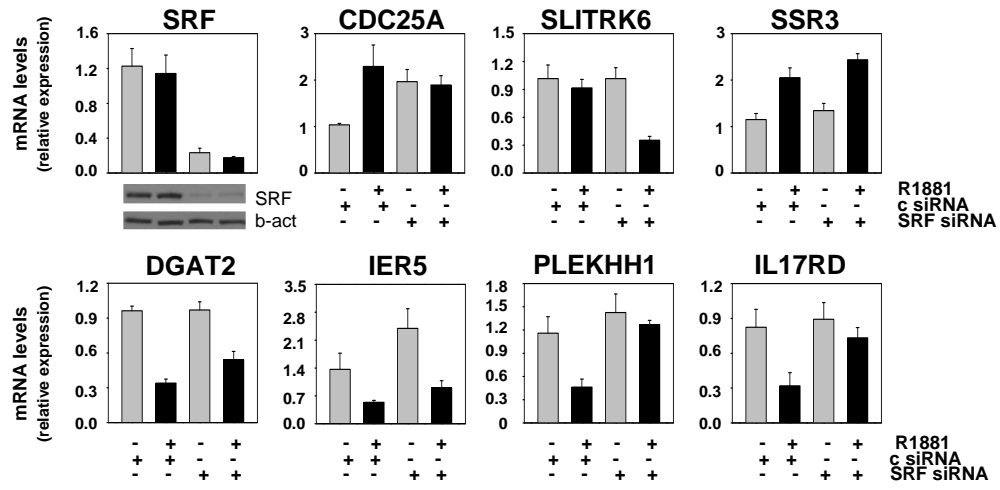

Supplement: NIHMS265571-supplement-5.pdf [file NIHMS265571-supplement-5.pdf]

**A**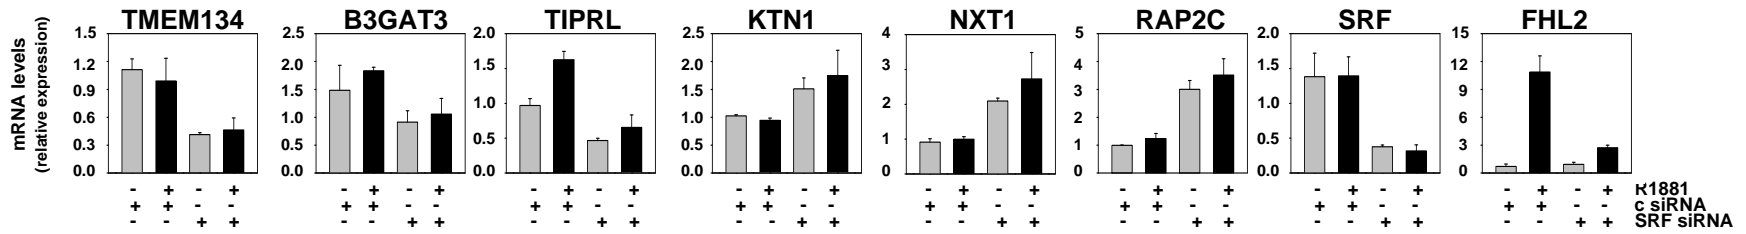**B**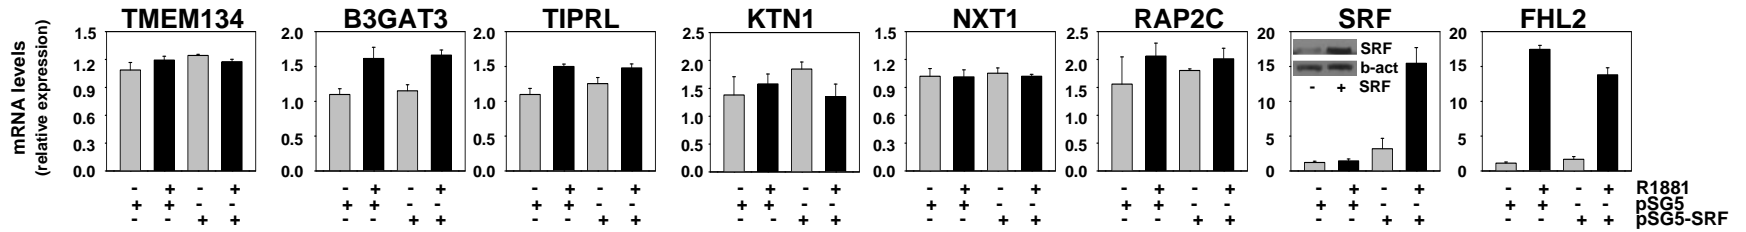

Supplement: NIHMS265571-supplement-6.pdf [file NIHMS265571-supplement-6.pdf]

# Heemers – Supplemental Figure 1

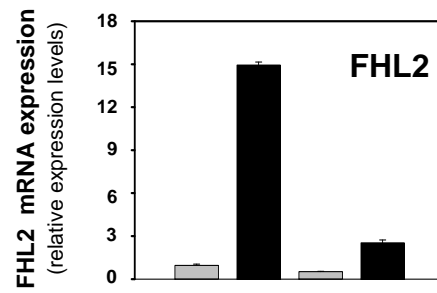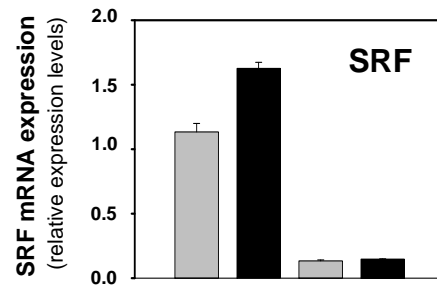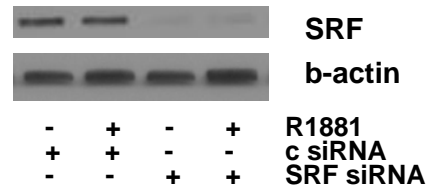

Supplement: NIHMS265571-supplement-7.pdf [file NIHMS265571-supplement-7.pdf]

## Heemers – Supplemental Figure 2

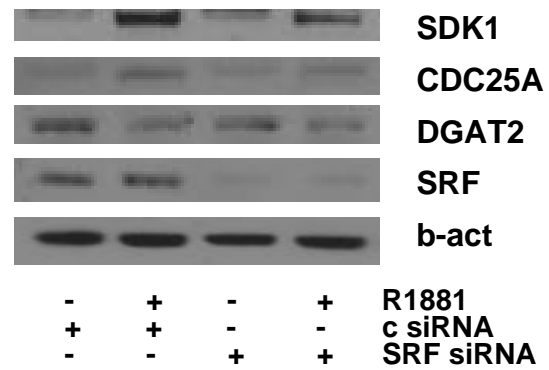

Supplement: NIHMS265571-supplement-8.pdf [file NIHMS265571-supplement-8.pdf]
